# Supplementary material for: Comparison of patient exit interviews with unannounced standardised patients for assessing HIV service delivery in Zambia: a study nested within a cluster randomised trial
Source: PubMed Central journal article supplement (PMC10335575; doi:10.1136/bmjopen-2022-069086), 2023-07-05

## Supplementary Figure 1.

**Impact of Training on Identifying Care Lapses Stratified by Subgroups for 10 questions.** We observed some level of interaction for care status, age category, education category and facility size. Panel **a)** Greet you in a way that made you feel comfortable **b)** Listen to what you said **c)** Give you as much information about your health as you wanted **d)** Allowed you to ask questions, responded, happy q456 **e)** spend the right amount of time with you **f)** feel about the care you received today **g)** satisfied with all your HIV care providers today **h)** witnessed HIV care providers behaving rudely during my visit today **i)** lost lab results **j)** pick up meds

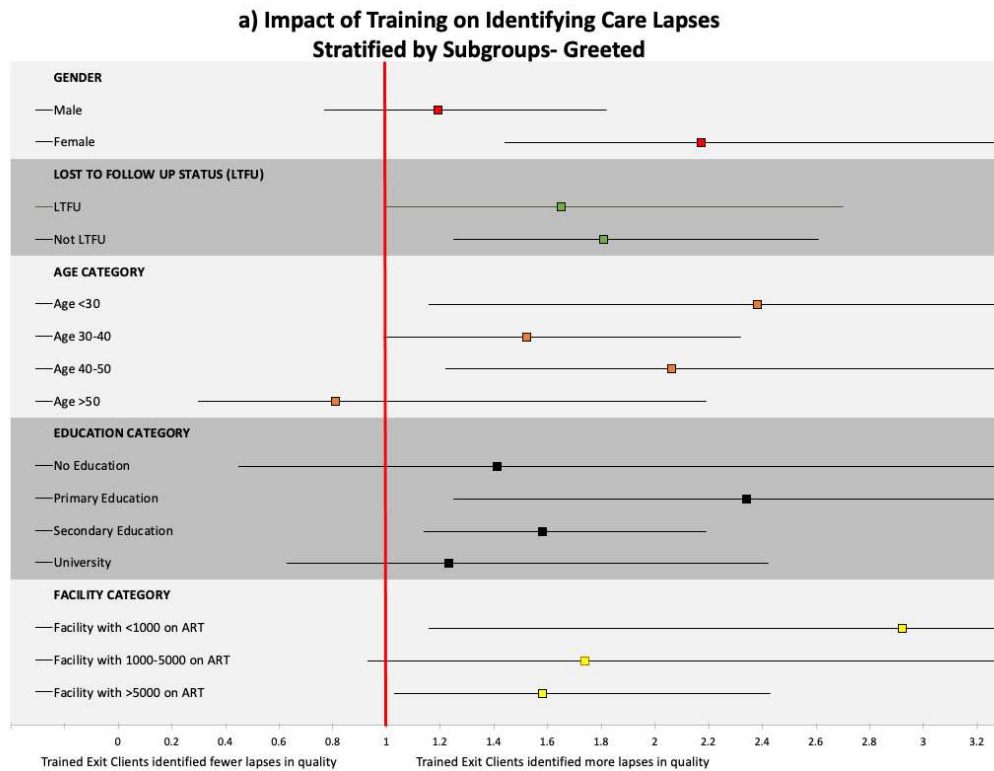

**b) Impact of Training on Identifying Care Lapses  
Stratified by Subgroups- Listened**

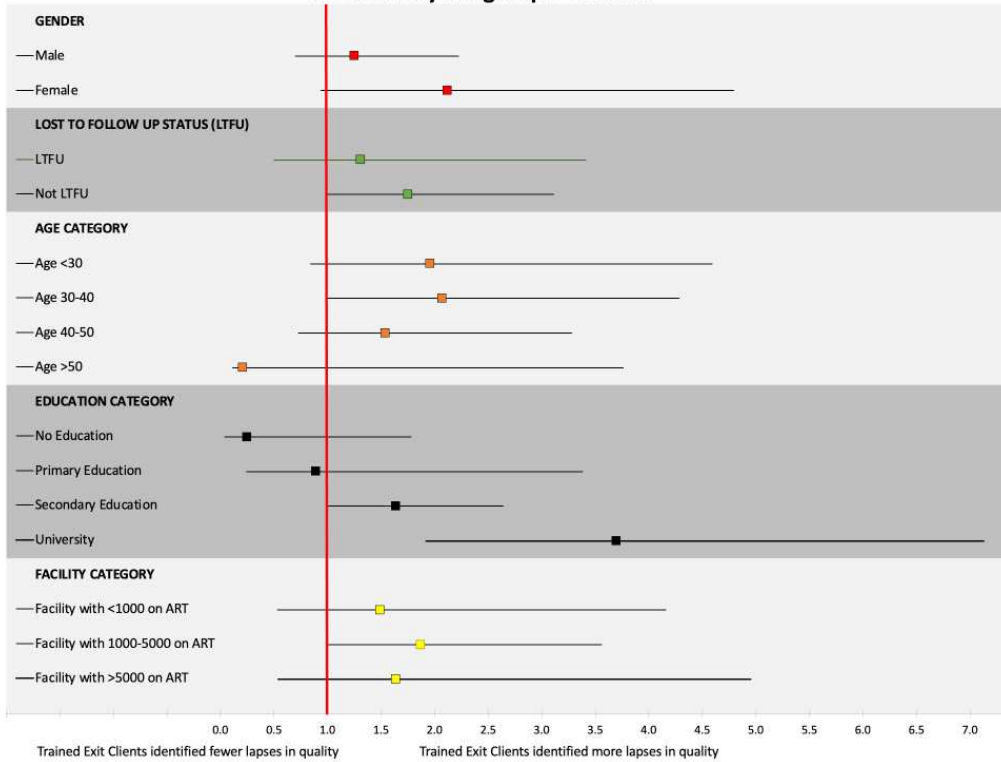

**c) Impact of Training on Identifying Care Lapses  
Stratified by Subgroups- Information**

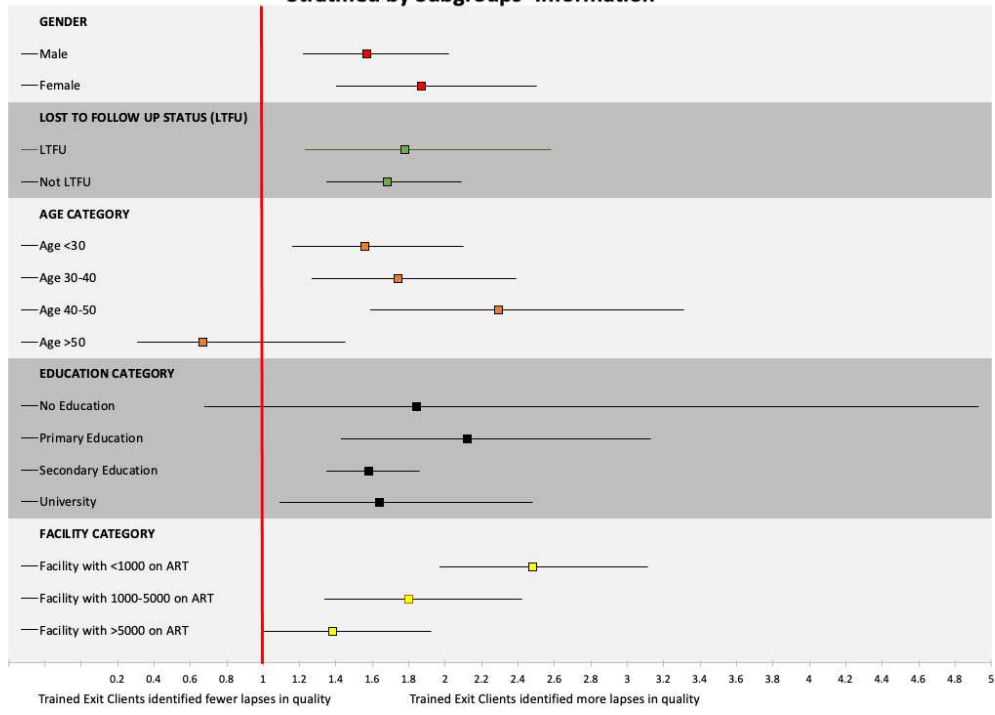

**d) Impact of Training on Identifying Care Lapses  
Stratified by Subgroups- Question\_456**

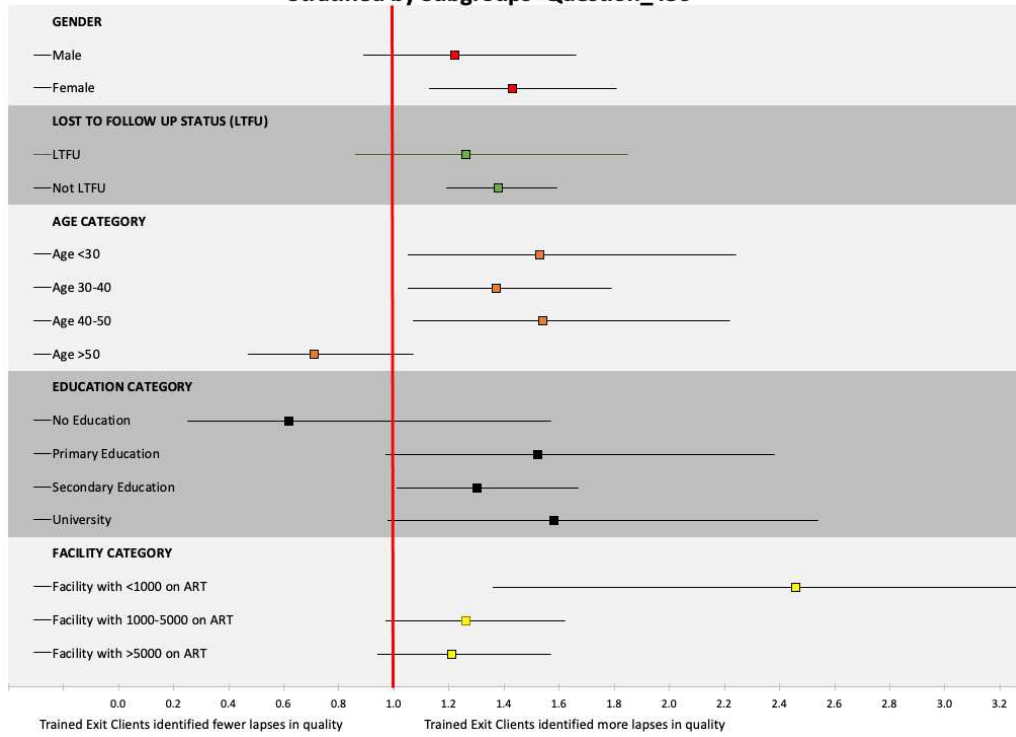

**e) Impact of Training on Identifying Care Lapses  
Stratified by Subgroups- Spend time**

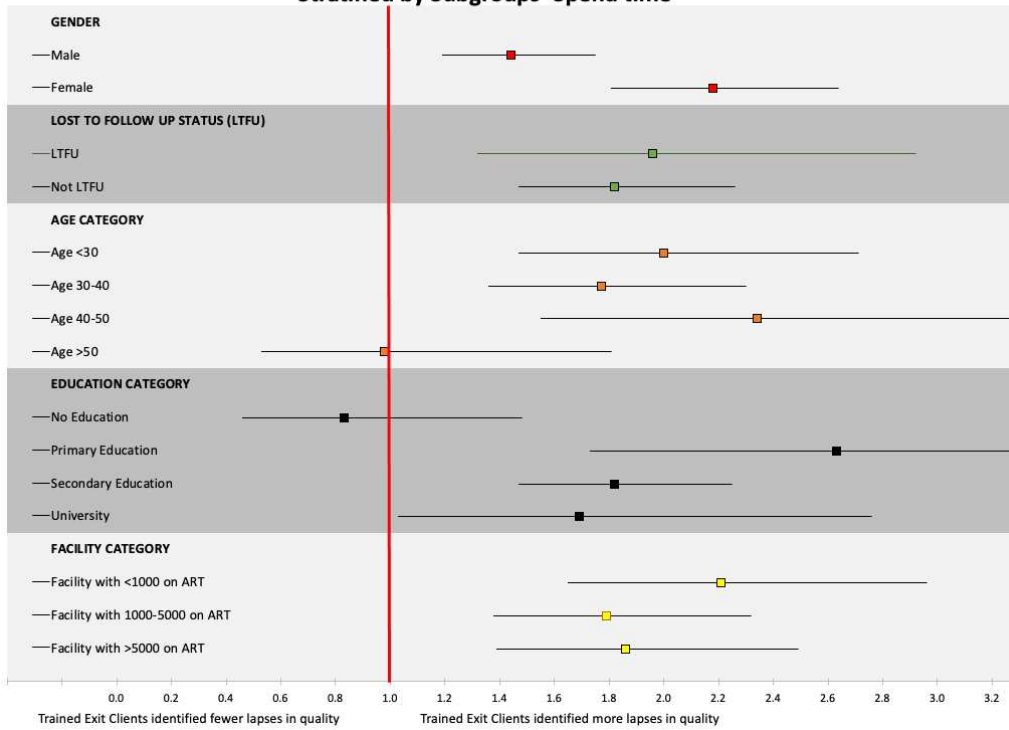

**f) Impact of Training on Identifying Care Lapses  
Stratified by Subgroups- Feel about care**

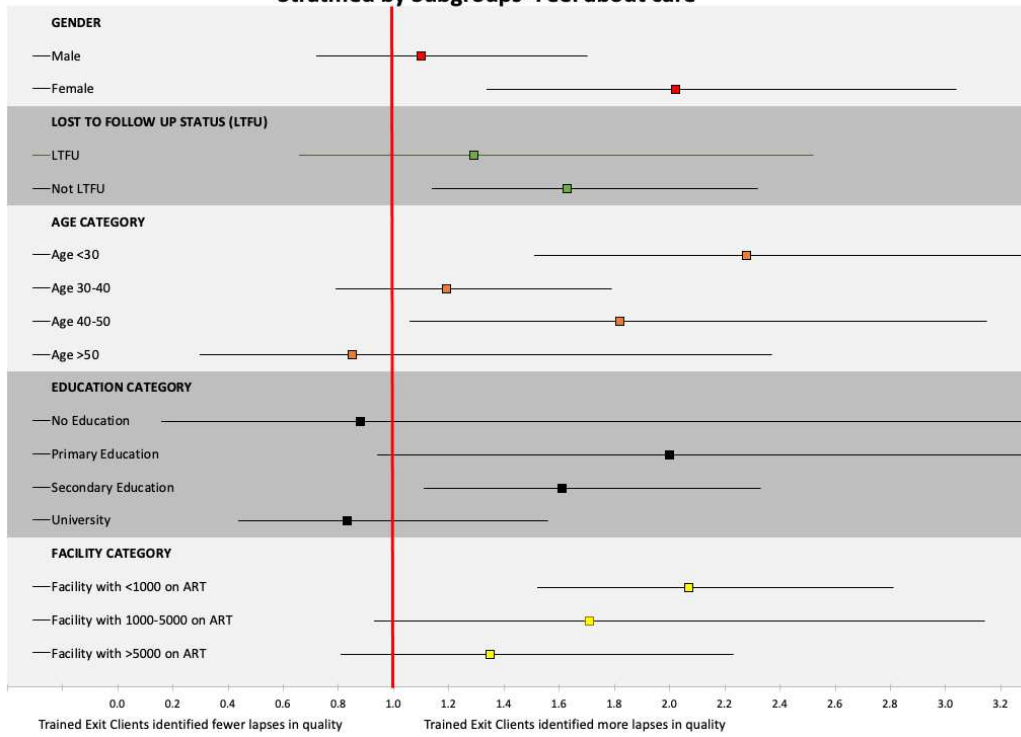

**g) Impact of Training on Identifying Care Lapses  
Stratified by Subgroups- Satisfied**

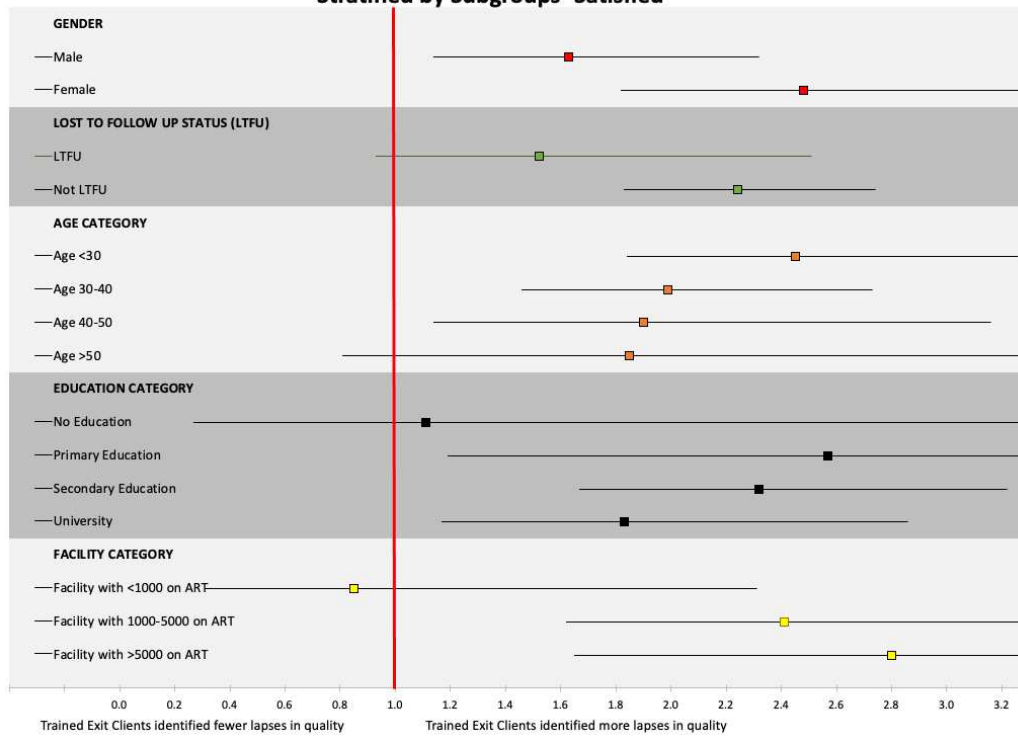

### h) Impact of Training on Identifying Care Lapses Stratified by Subgroups- Rude

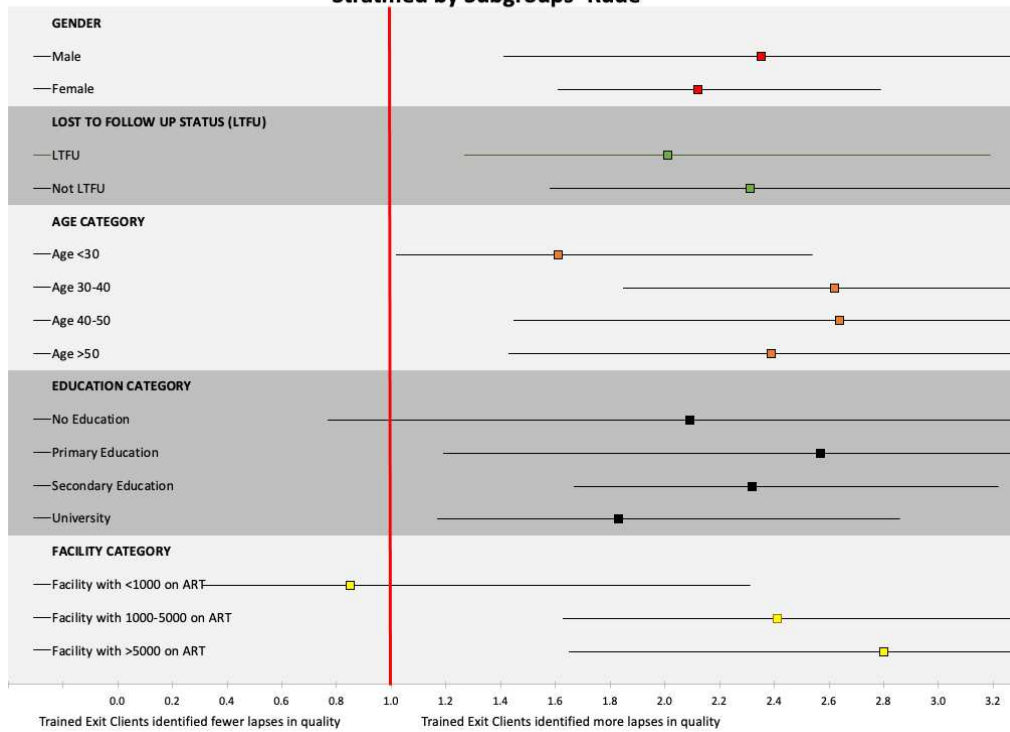



**i) Impact of Training on Identifying Care Lapses  
Stratified by Subgroups- Lab results**

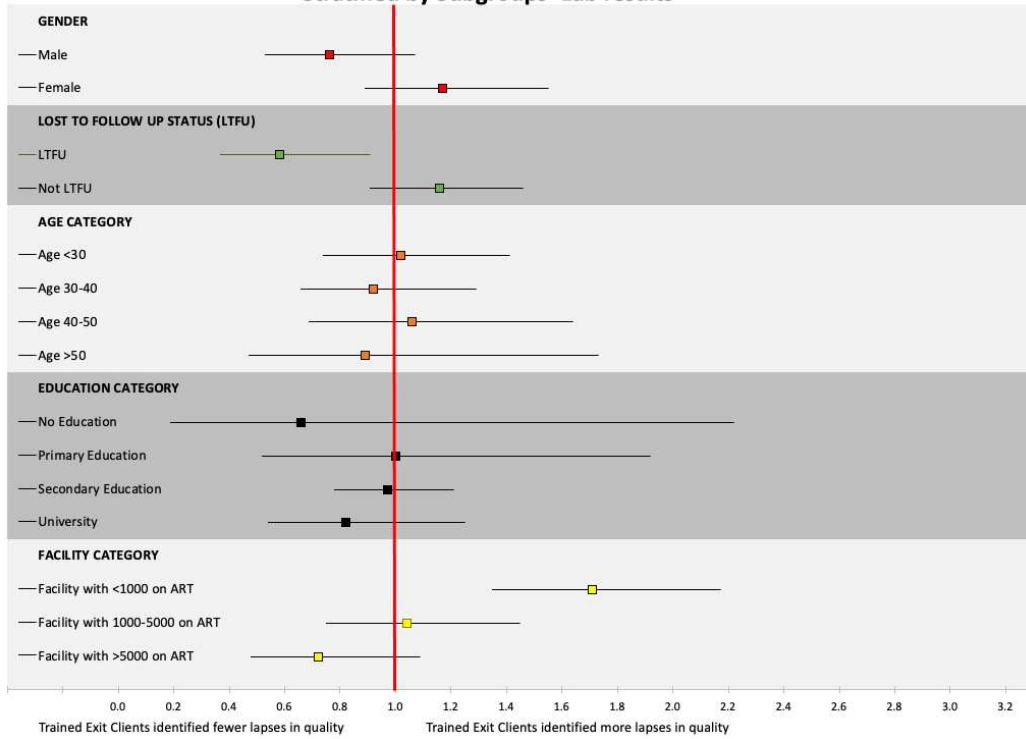

**j) Impact of Training on Identifying Care Lapses Stratified by Subgroups- Pick up meds**

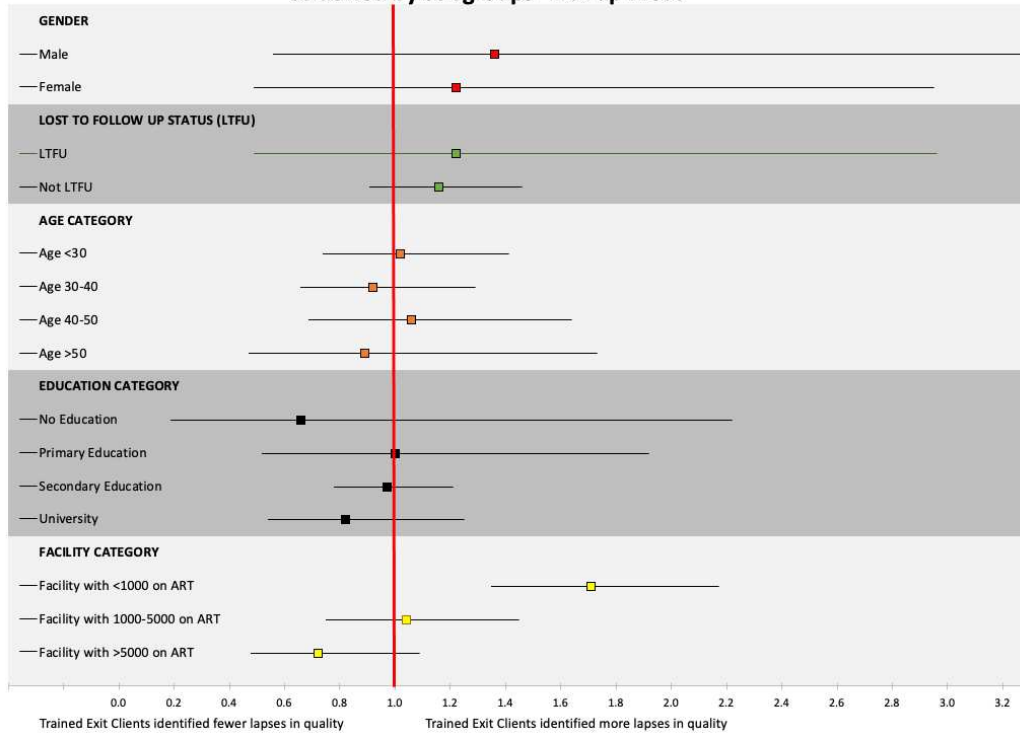

Supplement: bmjopen-2022-069086supp001.pdf [file bmjopen-2022-069086supp001.pdf]
