# Supplementary material for: Comparison of patient exit interviews with unannounced standardised patients for assessing HIV service delivery in Zambia: a study nested within a cluster randomised trial
Source: PubMed Central journal article supplement (PMC10335575; doi:10.1136/bmjopen-2022-069086), 2023-07-05
Supplement: bmjopen-2022-069086.draft_revisions.pdf [file bmjopen-2022-069086.draft_revisions.pdf]

# BMJ Open

BMJ Open is committed to open peer review. As part of this commitment we make the peer review history of every article we publish publicly available.

When an article is published we post the peer reviewers' comments and the authors' responses online. We also post the versions of the paper that were used during peer review. These are the versions that the peer review comments apply to.

The versions of the paper that follow are the versions that were submitted during the peer review process. They are not the versions of record or the final published versions. They should not be cited or distributed as the published version of this manuscript.

BMJ Open is an open access journal and the full, final, typeset and author-corrected version of record of the manuscript is available on our site with no access controls, subscription charges or pay-per-view fees (<http://bmjopen.bmj.com>).

If you have any questions on BMJ Open's open peer review process please email [info.bmjopen@bmj.com](mailto:info.bmjopen@bmj.com)

# BMJ Open

## Understanding the patient experience to improve HIV service delivery using an adapted standardised patient approach in 16 facilities in Zambia

|                               |                                                                                                                                                                                                                                                                                                                                                                                                                                                                                                                                                                                                                                                                                                                                                                                                                                                                                                                                                                                                                                                                                                                                                                                                                                                                                                                                                                                                                                                                                                                                                                                                                                                                                                                                                                                                                                                                                                                                                                                                                                                                                                                                                                                                        |
|-------------------------------|--------------------------------------------------------------------------------------------------------------------------------------------------------------------------------------------------------------------------------------------------------------------------------------------------------------------------------------------------------------------------------------------------------------------------------------------------------------------------------------------------------------------------------------------------------------------------------------------------------------------------------------------------------------------------------------------------------------------------------------------------------------------------------------------------------------------------------------------------------------------------------------------------------------------------------------------------------------------------------------------------------------------------------------------------------------------------------------------------------------------------------------------------------------------------------------------------------------------------------------------------------------------------------------------------------------------------------------------------------------------------------------------------------------------------------------------------------------------------------------------------------------------------------------------------------------------------------------------------------------------------------------------------------------------------------------------------------------------------------------------------------------------------------------------------------------------------------------------------------------------------------------------------------------------------------------------------------------------------------------------------------------------------------------------------------------------------------------------------------------------------------------------------------------------------------------------------------|
| Journal:                      | <i>BMJ Open</i>                                                                                                                                                                                                                                                                                                                                                                                                                                                                                                                                                                                                                                                                                                                                                                                                                                                                                                                                                                                                                                                                                                                                                                                                                                                                                                                                                                                                                                                                                                                                                                                                                                                                                                                                                                                                                                                                                                                                                                                                                                                                                                                                                                                        |
| Manuscript ID                 | bmjopen-2022-069086                                                                                                                                                                                                                                                                                                                                                                                                                                                                                                                                                                                                                                                                                                                                                                                                                                                                                                                                                                                                                                                                                                                                                                                                                                                                                                                                                                                                                                                                                                                                                                                                                                                                                                                                                                                                                                                                                                                                                                                                                                                                                                                                                                                    |
| Article Type:                 | Original research                                                                                                                                                                                                                                                                                                                                                                                                                                                                                                                                                                                                                                                                                                                                                                                                                                                                                                                                                                                                                                                                                                                                                                                                                                                                                                                                                                                                                                                                                                                                                                                                                                                                                                                                                                                                                                                                                                                                                                                                                                                                                                                                                                                      |
| Date Submitted by the Author: | 19-Oct-2022                                                                                                                                                                                                                                                                                                                                                                                                                                                                                                                                                                                                                                                                                                                                                                                                                                                                                                                                                                                                                                                                                                                                                                                                                                                                                                                                                                                                                                                                                                                                                                                                                                                                                                                                                                                                                                                                                                                                                                                                                                                                                                                                                                                            |
| Complete List of Authors:     | <p>Sikombe, Kombatende; Center for Infectious Disease Research in Zambia, Implementation Science Unit; London School of Hygiene and Tropical Medicine Faculty of Public Health and Policy, Department of Public Health, Environments and Society</p> <p>Pry, Jake; Center for Infectious Disease Research in Zambia, Implementation Science Unit</p> <p>Mody, Aaloke; Washington University in St Louis School of Medicine, Internal Medicine</p> <p>Rice, Brian ; London School of Hygiene and Tropical Medicine Faculty of Public Health and Policy, Department of Public Health, Environments and Society</p> <p>Bukankala, Chama; Center for Infectious Disease Research in Zambia, Research</p> <p>Eshun-Wilson, Ingrid ; Washington University in St Louis School of Medicine, Internal Medicine</p> <p>Mutale, Jacob; Center for Infectious Disease Research in Zambia, Implementation Science Unit</p> <p>Simbeza, Sandra; Center for Infectious Disease Research in Zambia, Implementation Science Unit</p> <p>Beres, Laura K ; Johns Hopkins University Bloomberg School of Public Health, Department of International Health</p> <p>Mukamba, Njekwa; Center for Infectious Disease Research in Zambia, Social and Behavioural Science Research Group</p> <p>Mukumbwa-Mwenechanya, Mpande; Center for Infectious Disease Research in Zambia, Implementation Science Unit</p> <p>Mwamba, Daniel; Center for Infectious Disease Research in Zambia, Clinical Care Services</p> <p>Sharma, Anjali; Center for Infectious Disease Research in Zambia, Social and Behavioural Science Research Group</p> <p>Wringe, Alison; London School of Hygiene and Tropical Medicine Faculty of Epidemiology and Population Health</p> <p>Hargreaves, James; London School of Hygiene and Tropical Medicine Faculty of Public Health and Policy, Department of Public Health, Environments and Society</p> <p>Bolton-Moore, Carolyn; Center for Infectious Disease Research in Zambia, Clinical Care Services ; The University of Alabama at Birmingham Department of Medicine, Infectious Disease</p> <p>Holmes, Charles; Georgetown University Medical Center, Center for Innovation in Global Health</p> |

1  
2  
3  
4  
5  
6  
7  
8  
9  
10  
11  
12  
13  
14  
15  
16  
17  
18  
19  
20  
21  
22  
23  
24  
25  
26  
27  
28  
29  
30  
31  
32  
33  
34  
35  
36  
37  
38  
39  
40  
41  
42  
43  
44  
45  
46  
47  
48  
49  
50  
51  
52  
53  
54  
55  
56  
57  
58  
59  
60

|           |                                                                                                                                                                                                                                           |
|-----------|-------------------------------------------------------------------------------------------------------------------------------------------------------------------------------------------------------------------------------------------|
|           | Sikazwe, Izukanji; Center for Infectious Disease Research in Zambia, Implementation Science Unit<br>Geng, Elvin; Washington University in St Louis School of Medicine, Internal Medicine                                                  |
| Keywords: | Public health < INFECTIOUS DISEASES, Organisation of health services < HEALTH SERVICES ADMINISTRATION & MANAGEMENT, Quality in health care < HEALTH SERVICES ADMINISTRATION & MANAGEMENT, HIV & AIDS < INFECTIOUS DISEASES, PUBLIC HEALTH |
|           |                                                                                                                                                                                                                                           |

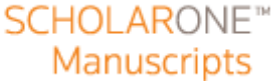

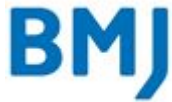

I, the Submitting Author has the right to grant and does grant on behalf of all authors of the Work (as defined in the below author licence), an exclusive licence and/or a non-exclusive licence for contributions from authors who are: i) UK Crown employees; ii) where BMJ has agreed a CC-BY licence shall apply, and/or iii) in accordance with the terms applicable for US Federal Government officers or employees acting as part of their official duties; on a worldwide, perpetual, irrevocable, royalty-free basis to BMJ Publishing Group Ltd ("BMJ") its licensees and where the relevant Journal is co-owned by BMJ to the co-owners of the Journal, to publish the Work in this journal and any other BMJ products and to exploit all rights, as set out in our [licence](#).

The Submitting Author accepts and understands that any supply made under these terms is made by BMJ to the Submitting Author unless you are acting as an employee on behalf of your employer or a postgraduate student of an affiliated institution which is paying any applicable article publishing charge ("APC") for Open Access articles. Where the Submitting Author wishes to make the Work available on an Open Access basis (and intends to pay the relevant APC), the terms of reuse of such Open Access shall be governed by a Creative Commons licence – details of these licences and which [Creative Commons](#) licence will apply to this Work are set out in our licence referred to above.

Other than as permitted in any relevant BMJ Author's Self Archiving Policies, I confirm this Work has not been accepted for publication elsewhere, is not being considered for publication elsewhere and does not duplicate material already published. I confirm all authors consent to publication of this Work and authorise the granting of this licence.

# Understanding the patient experience to improve HIV service delivery using an adapted standardised patient approach in 16 facilities in Zambia

Kombatende Sikombe<sup>1,2</sup>, Jake M Pry<sup>1,3</sup>, Aaloke Mody<sup>4</sup>, Brian Rice, Chama Bukankala<sup>1</sup>, Ingrid Eshun-Wilson<sup>4</sup>, Jacob Mutale<sup>1</sup>, Sandra Simbeza<sup>1</sup>, Laura K Beres<sup>5</sup>, Njekwa Mukamba<sup>1</sup>, Mpande Mukumbwa-Mwenechanya<sup>1</sup>, Daniel Mwamba<sup>1</sup>, Anjali Sharma<sup>1</sup>, Alison Wringe<sup>6</sup>, James Hargreaves<sup>1</sup>, Carolyn Bolton Moore<sup>1,7</sup>, Charles B Holmes<sup>8</sup>, Izukanji Sikazwe<sup>1</sup>, Elvin Geng<sup>4</sup>

<sup>1</sup>Centre for Infectious Disease Research in Zambia, Lusaka, Zambia, <sup>2</sup>Faculty of Public Health and Policy, London School of Hygiene & Tropical Medicine, London, UK, <sup>3</sup>Department of Public Health Sciences, University of California, Davis, CA, USA, <sup>4</sup>Division of Infectious Diseases, Washington University in St Louis, St. Louis, MO, USA, <sup>5</sup>Department of International Health, Johns Hopkins Bloomberg School of Public Health, Baltimore, MD, USA, <sup>6</sup>Faculty of Epidemiology and Population Health, London School of Hygiene and Tropical Medicine, London, UK, <sup>7</sup>Department of Medicine, School of Medicine, University of Alabama at Birmingham, Birmingham, AL, USA, <sup>8</sup>Center for Innovation in Global Health, Georgetown University, Washington, DC, USA.

Corresponding Author: Kombatende Sikombe

Affiliations: Centre for Infectious Disease Research in Zambia, Lusaka, Zambia, Faculty of Public Health and Policy, London School of Hygiene & Tropical Medicine, London, UK

Email Address: [kombatende.sikombe@cidrz.org](mailto:kombatende.sikombe@cidrz.org)

## ABSTRACT

**Objectives:** To evaluate sub-optimal patient experiences in HIV care (e.g., unfriendly interactions with health care workers [HCW], long-waiting times, and lost laboratory results) using an adapted standardised patient approach “mystery-clients” that addresses information and social desirability biases.

**Setting:** Cross-sectional surveys in 16 government-operated HIV primary care clinics in Lusaka, Zambia providing antiretroviral-therapy (ART).

**Participants:** 3526 participants  $\geq 18$  years of age receiving ART participated in the exit surveys between August 2019 and November 2021.

**Intervention:** Patients systematically sampled from the clinic waiting area willing to be trained received pre-visit training and post-visit interviews. HCWs were unaware of trained patients.

**Outcome measures:** We assessed patient experience among patients that received a brief training prior to their care visit (explaining each patient experience construct in the exit survey, being anonymous, not altering behaviour or manipulating interactions) with those who did not undergo training on the instrument prior to their visit.

**Results:** Among 3526 participants who participated in the exit surveys, 2415 were untrained (56% female, median age 40 (IQR:32-47)) and 1111 were trained (50% female, median age 37 (IQR:31-45)). Compared to untrained, trained patients were more likely to report a negative care experience overall (adjusted Prevalence Ratio aPR for aggregate sum score: 1.64 [95% CI:1.39-1.94]), with a greater proportion reporting feeling unwelcomed by providers ([aPR]: 1.71 [95% CI:1.20-2.44]) and witnessing providers behaving rudely (aPR: 2.28 [95% CI:1.63-3.19]).

**Conclusion:** Trained patients were more likely to identify instances of sub-optimal care. They may have had a better understanding of the items solicited or felt empowered to be more critical. Unlike studies where “standardised patients” are drawn from outside of the patient population, we trained existing patients. This low-cost strategy might be used in other settings to improve patient-centred service delivery.

**Trial registration:** Assessment was nested within a parent study. [www.pactr.org](http://www.pactr.org) registered the parent study (PACTR202101847907585).

## STRENGTHS AND LIMITATIONS OF THIS STUDY

- Patient experience is hard to measure rigorously and pragmatically. Approaches to assessing patient experience such as standardised patient (SP) surveys are often referred to as the golden standard. However, these methods are not feasible in HIV care settings with limited resources because they frequently require highly skilled personnel and are typically utilised for episodic care. The current procedure for SP calls for a trained individual to make one visit to many locations while acting as a simulated patient.
- We present a novel approach to measuring patient experience using an adapted version of the standardised patient approach. In our method, we trained actual patients to look out for certain facility characteristics, to evaluate key components of quality of care such as waiting times, communication, respectfulness of providers, and privacy and compared their responses to traditional exit survey responses in 16 health facilities in Zambia.
- Recipients of care who received a brief training provided more critical appraisal of care either because they were more alert to the items solicited or felt empowered to be more critical. Patient-centred care can be institutionalised further through the evaluation of what occurs at the point of contact between the patient, the healthcare facility, and the healthcare professional using this low-cost method.

## BACKGROUND

Retention in care remains a major obstacle to improving Human Immunodeficiency Virus (HIV) treatment outcomes, and health systems in low-income settings like Zambia, have sought to shift their public health response by designing and delivering high quality and patient-centred HIV care [1–6]. Efforts to improve service quality and patient experience require systematic measurement of the patient experience to guide facility responses as poor patient experience has been shown to lead to disengagement from care [7–11]. Health policymakers and donors, such as the President's Emergency Plan for AIDS Relief (PEPFAR), have invested in clinical metrics to assess care quality in Zambia and the wider region, but to a lesser extent in non-clinical metrics like patient experience [12]. These metrics can be critical for guiding efforts to improve retention in care by ensuring an informed response to improving quality of care and patient centredness.

Accurate and pragmatic measurement of the patient experience poses a range of challenges. Patient experience exit surveys are prone to social desirability bias because of power dynamics in health care. Empirical studies of satisfaction, for example, are widely believed to over-estimate patient satisfaction [13]. This may be particularly true where provider-patient relationships are traditional and hierarchical. Delaying surveys for some time after the encounter is theorised to ameliorate social desirability bias, but in turn may exacerbate bias due to simple inability to remember — thus creating recall bias [6]. Other methods such as direct clinical observations of care pose practical difficulties [13,14]. For example, direct observations may be intrusive and therefore may not reflect everyday functionality of a health facility. Care provided under direct observations may be of higher quality as behaviour may be influenced by observation, a phenomenon often known as the “Hawthorne effect” [13,14].



1  
2  
3 161 Standardised patients (SP), also known as “mystery clients” or “simulated patients” have  
4  
5  
6 162 largely been used to assess quality of care in developed countries, as well as in assessing customer  
7  
8 163 service in the retail industry[15]. SP can be resource-intensive and require training, but reduce  
9  
10 164 potential for recall bias, social desirability, bias, and Hawthorne effects, providing an opportunity  
11  
12 165 for optimal assessment of patient satisfaction among people receiving HIV care [6,16]. They have  
13  
14  
15 166 largely been used for episodic care where a highly skilled and well-trained person poses as a client  
16  
17 167 by making one visit to multiple facilities. This approach holds promise for assessing the patient  
18  
19 168 experience in HIV care but poses pragmatic challenges when assessing the quality of chronic care  
20  
21  
22 169 in which a patient makes multiple visits and may compromise efficiency at, already overburdened,  
23  
24 170 facilities [17–22]. In this study, we report on the development and evaluation of a modified SP  
25  
26 171 approach in which we trained real patients (trained exit clients - TEC) to report on certain  
27  
28  
29 172 characteristics of encounters, and rate key components of care such as waiting times, communication,  
30  
31 173 respectfulness of providers, and privacy.  
32  
33

## 34 35 174 **METHODS**

### 36 37 175 **Study design & setting**

38  
39  
40 176 This study seeks to compare two different methods for assessing patient experience: standard  
41  
42 177 exit survey and those reported by patients who had a brief training on the items before the clinical  
43  
44 178 encounter and to whom the clinic was blinded. The assessment was nested within a parent study:  
45  
46  
47 179 the Leveraging Person-Centred Public Health (PCPH) to improve HIV outcomes in Zambia study  
48  
49 180 ([www.pactr.org](http://www.pactr.org) PACTR202101847907585), a Stepped Wedge Cluster Randomised Trial that  
50  
51 181 occurred between August 2019 and November 2021. The aim of the PCPH study was to assess the  
52  
53  
54 182 impact of introducing health care workers (HCW) to a patient-centred care (PCC) curriculum and  
55  
56 183 mentoring them on PCC principles to improve retention and viral suppression in HIV care. The two  
57  
58  
59  
60

1  
2  
3 184 assessments we compare were conducted primarily to evaluate effects of the intervention. This  
4  
5  
6 185 comparative analysis is secondary analysis of the experience endpoints.  
7

## 8 186 9 10 187 **Population**

11  
12 188 The sub-study reported here included 16 health facilities in Lusaka, Zambia, operated by the  
13  
14  
15 189 Ministry of Health (MOH) and receiving technical assistance from the Centre for Infectious  
16  
17 190 Diseases Research in Zambia (CIDRZ) - a Zambian non-governmental organisation (NGO) as well  
18  
19 191 as a part of the larger parent study. We surveyed adults aged 18 years and over who were accessing  
20  
21  
22 192 antiretroviral therapy (ART) at study facilities. Exit survey patients were selected in a systematic  
23  
24 193 sample at the time of exit from the clinic. Trained patients were recruited in the waiting room for  
25  
26 194 their visit, underwent a brief training, and then answered survey questions on exit from their  
27  
28 195 encounter. Participants attending an HIV care visit on the day, able to recall events and comprehend  
29  
30  
31 196 study participant recruitment details (as assessed using the comprehension assessment tool) and able  
32  
33 197 to read and write (assessed using literacy tool) were eligible for inclusion.  
34

## 35 198 36 37 38 199 **Procedures and Measurements**

### 39 40 200 *Survey Instrument*

41  
42 201 For both survey methods, we developed a patient experience instrument based on a previously  
43  
44  
45 202 validated tool developed and used in Kenya: The Wachira Physician-Patient Communication  
46  
47 203 Behaviours Scale [23–25]. This survey assessed elements of patient experience including how they  
48  
49 204 were greeted, communicated to, and overall experience. We included additional questions to capture  
50  
51  
52 205 for example, patient reports of witnessing rude behaviour, receiving appropriate medications and  
53  
54 206 availability of lab results. Prior to use in this study, we performed cognitive interviews among  
55  
56 207 twenty participants to assess consistency in understanding questions in English, Bemba and Nyanja.  
57  
58  
59

1  
2  
3 208 Surveys were forward and back translated to ensure consistency across the three languages. The  
4  
5  
6 209 survey tools for trained and untrained clients were identical. For both trained and untrained clients,  
7  
8 210 all interviews and surveys were conducted in either English, Bemba or Nyanja depending on the  
9  
10 211 participant's preference.

11  
12 212 For the untrained exit surveys, among patients leaving the facility after attending the clinic on  
13  
14  
15 213 the survey day, we took a systematic (every  $k^{th}$ , varied by facility size) sample of patients. Patients  
16  
17 214 were approached by study staff after the visit using a recruitment script to determine their eligibility  
18  
19 215 and were administered the survey after granting consent. Participants received a snack during the  
20  
21  
22 216 survey administration, but no other financial incentive.

#### 23 24 217 Additional procedures for Trained Exit Client

25  
26 218 Efforts to “standardise” assessment of the quality and nature of care in HIV care differs from  
27  
28  
29 219 most previously standardised patient or mystery client work in that HIV care is longitudinal as  
30  
31 220 opposed to episodic or acute care. Under these circumstances, the more conventional standardised  
32  
33 221 patient where a single trained actor can present to multiple different care facilities as a simulated  
34  
35 222 patient with a defined set of symptoms or complaints to assess a single episode of care is not feasible.  
36  
37  
38 223 For example, a patient would have to either register as a new patient or have a false “file” introduced  
39  
40 224 into the paper and electronic medical records — which was deemed infeasible and undesirable.  
41

42 225 Instead of simulated patients, we recruited existing patients already receiving care at a particular  
43  
44  
45 226 facility and then subsequently trained them on the concepts of quality of care according to the MOH  
46  
47 227 manual on Quality Improvement for HCWs in Zambia. To avoid disclosing their trained status,  
48  
49 228 patients were recruited prior to them entering the triage area (i.e., the first point of contact with  
50  
51  
52 229 HCWs). Those who consented underwent a single training session for 40 to 60 minutes where they  
53  
54 230 were sensitised to the study instrument (which was the same for both TEC and untrained exit clients  
55  
56  
57  
58  
59  
60

1  
2  
3 231 (UEC)), the MOH care standards, and strategies on being natural yet observant during their clinic  
4  
5 232 visit for that day according to the standard SP approach. These procedures were meant to ensure  
6  
7  
8 233 patients had a clear and uniform understanding on what they should expect during a high-quality  
9  
10 234 patient visit and were attentive to these critical aspects relative to these standards. After this training,  
11  
12 235 the TEC presented themselves to their facility and completed their visit as they normally would.  
13  
14  
15 236 After their clinic encounter, participants then completed the exit survey. Given the extra time  
16  
17 237 commitments required for the training, TEC participants were given K100 (~\$5) for the time spent  
18  
19 238 during training. Research assistants were trained by the first author and were available for  
20  
21 239 recruitment, training and administering of the TEC and UEC survey in all 16 facilities. The  
22  
23  
24 240 provincial and district health management teams were informed about the unannounced TEC survey  
25  
26 241 as well as the UEC survey. The study team sensitised all facility staff at the start of the study, but  
27  
28 242 HCWs were not aware of who specific TECs were.  
29  
30

### 31 243 32 33 244 **Statistical Analysis**

34  
35 245 To assess the association between training and response for each question, we conducted  
36  
37  
38 246 unadjusted and adjusted poisson regression for each question separately [26]. We then assessed the  
39  
40 247 overall association between training and total sum score. We used descriptive statistics to  
41  
42 248 characterise patient characteristics and report survey responses. In these analyses, most of the survey  
43  
44  
45 249 responses were reverse coded to identify when respondents reported a negative experience. Results  
46  
47 250 for individual questions (binary response) represent prevalence ratios for reporting a lapse in care.  
48  
49 251 To assess the sum score (count data) we used Poisson regression, estimating the rate ratio for  
50  
51 252 reporting lapses in care. All models were adjusted, given potential differences in survey participants  
52  
53  
54 253 related to different recruitment strategies using mixed-effects regression, adjusted for age, sex,  
55  
56  
57  
58  
59

1  
2  
3 254 education, care status at the time (i.e., continuously retained in care versus returning to care after  
4  
5  
6 255 disengagement/ lost to follow up [LTFU]), secular time (using cubic splines), allowing random  
7  
8 256 effects at the facility level. We present these results for the overall population as well as stratified  
9  
10 257 by different patient subgroups. Lastly, we used bubble plots to compare summary assessments of  
11  
12 258 the patient experience at the facility-level using TECs versus UECs. All analyses were performed  
13  
14  
15 259 using STATA 14MP (StataCorp, College Station, TX, USA). This sub-study represents a secondary  
16  
17 260 analysis and no formal power calculations were performed for this outcome.  
18  
19 261

### 21 22 262 **Statement of Ethics Approval**

23 263  
24 264 Ethics approval to conduct this research was granted by the Zambian Ministry of Health,  
25  
26 265 National Health Research Authority, and the institutional review boards of the University of Zambia  
27  
28 266 (008-03-19), the University of Alabama at Birmingham (300003282) and the London School of  
29  
30  
31 267 Hygiene and Tropical Medicine (21384).  
32

### 33 268 34 35 36 269 **Patient and Public Involvement**

37  
38 270 Survey questions were developed through a cognitive process with recipients of care. Study  
39  
40 271 implementation guidance was conducted as part of routine CIDRZ partnership with the Zambian  
41  
42 272 MOH through a Human Centered Design workshop. CIDRZ engages with implementing partners  
43  
44  
45 273 and affected communities in health facilities, including people living with HIV often represented by  
46  
47 274 neighbourhood health representatives. Although patients were not directly involved in the design of  
48  
49 275 the parent study intervention or the analysis presented here, all study activities were guided by a  
50  
51  
52 276 Scientific Advisory Board with representation from the MOH and a representative of recipients of  
53  
54 277 HIV care. Dissemination of study results is ongoing.  
55  
56  
57  
58  
59  
60

## RESULTS

### Characteristics of health facilities and patients

We approached 4375 clients (2955 in the untrained and 1420 in the trained), and 3526 participated, of which 2415 (55.2%) completed experience surveys as untrained exit clients (UEC) (56% female, median age was 40 years (interquartile range [IQR]:32-47 years)) and 1111 (32%) completed experience surveys as trained exit clients (TEC) (50% female with a median age 37 years (IQR:31-45 years)). Reasons for non-participation included unavailability at the time due to other commitments. Sixteen percent (16%) of UECs and 40% of TECs who had been lost to care and were returning to care on the day of the survey. Education levels differed between UEC and TEC with 47% and 58% reporting completion of secondary level of education, respectively (Table 1). UEC and TEC were similar for HIV enrolment WHO stage with the largest proportion enrolling at WHO stage 1 and similar in terms of marital status.

**Table 1. Socio-demographic characteristics of untrained exit and trained exit clients**

| Characteristics            | Level               | Untrained Exit Clients<br>n=2415 (68%) | Trained Exit Clients<br>n=1111 (32%) |
|----------------------------|---------------------|----------------------------------------|--------------------------------------|
| <b>Sex, n (%)</b>          | <b>Female</b>       | 1355 (56)                              | 553 (50)                             |
|                            | <b>Male</b>         | 1060 (44)                              | 558 (50)                             |
| <b>Age, Median (IQR)</b>   |                     | 40 (32-47)                             | 37 (31-45)                           |
| <b>Age category, n (%)</b> | <b>&lt;30 years</b> | 453 (19)                               | 258 (23)                             |
|                            | <b>30-40 years</b>  | 828 (34)                               | 416 (37)                             |
|                            | <b>40-50 years</b>  | 815 (34)                               | 304 (27)                             |
|                            | <b>&gt;50 years</b> | 319 (13)                               | 133 (12)                             |
| <b>Education category</b>  | <b>None</b>         | 132 (5)                                | 36 (3)                               |
|                            | <b>Primary</b>      | 654 (27)                               | 166 (15)                             |
|                            | <b>Secondary</b>    | 1134 (47)                              | 645 (58)                             |
|                            | <b>University</b>   | 150 (6)                                | 100 (9)                              |
|                            | <b>Missing</b>      | 307 (13)                               | 151 (14)                             |

|                                    |                           |           |          |
|------------------------------------|---------------------------|-----------|----------|
| <b>HIV Enrollment Stage</b>        |                           |           |          |
|                                    | <b>WHO Stage 1</b>        | 1173 (49) | 533 (48) |
|                                    | <b>WHO Stage 2</b>        | 314 (13)  | 147 (13) |
|                                    | <b>WHO Stage 3</b>        | 355 (15)  | 162 (15) |
|                                    | <b>WHO Stage 4</b>        | 27 (1)    | 7 (1)    |
|                                    | <b>Missing</b>            | 546 (23)  | 262 (24) |
| <b>Care status at survey visit</b> |                           |           |          |
|                                    | <b>In care</b>            | 2038 (84) | 664 (60) |
|                                    | <b>Returning to care</b>  | 377 (16)  | 447 (40) |
| <b>Marital Status</b>              |                           |           |          |
|                                    | <b>Single</b>             | 257 (11)  | 167 (15) |
|                                    | <b>Married</b>            | 1361 (56) | 575 (52) |
|                                    | <b>Divorced</b>           | 248 (10)  | 108 (10) |
|                                    | <b>Widowed</b>            | 173 (7)   | 81 (7)   |
|                                    | <b>Unknown</b>            | 41 (2)    | 20 (2)   |
|                                    | <b>Missing</b>            | 335 (14)  | 160 (14) |
| <b>Facility size</b>               |                           |           |          |
|                                    | <b>&lt; 1000 patients</b> | 591 (25)  | 245 (22) |
|                                    | <b>1000-5000 patients</b> | 897 (37)  | 485 (44) |
|                                    | <b>&gt; 5000 patients</b> | 927 (38)  | 381 (34) |

Table 2 shows the absolute responses for TEC and UEC. Although most patients reported a good experience, across the questions between 5% and 25% of patients reported poor experiences in care. For example, when asked if their HIV care provider gave them as much information about their health as they wanted, 13.4% (UEC) vs 24.6% (TEC) of patients reported not being provided with sufficient information about their health. Similarly, between 9.6% vs 18.8% patients reported that their HIV care provider was not spending the right amount of time with them at their visit, and 6.8% vs 16.4% reported witnessing rude behaviour.

**Table 2. Survey responses by training status**

| Factor                                                                                          | Level               | Untrained<br>Exit Client<br>n (%) | Trained<br>Exit Client<br>n (%) |
|-------------------------------------------------------------------------------------------------|---------------------|-----------------------------------|---------------------------------|
| <b>Did your HIV care provider greet you in a way that made you feel comfortable?</b>            | Yes                 | 2249 (93.1)                       | 980 (88.2)                      |
|                                                                                                 | No                  | 166 (6.9)                         | 131 (11.8)                      |
| <b>Did your HIV care provider listen to what you said?</b>                                      | Yes                 | 2328 (96.4)                       | 1039 (93.5)                     |
|                                                                                                 | No                  | 79 (3.3)                          | 64 (5.8)                        |
|                                                                                                 | Refused             | 8 (0.3)                           | 8 (0.7)                         |
| <b>Did your HIV care provider give you as much information about your health as you wanted?</b> | Yes                 | 2092 (86.6)                       | 838 (75.4)                      |
|                                                                                                 | No                  | 323 (13.4)                        | 273 (24.6)                      |
| <b>Did your HIV care provider allow you to ask questions?</b>                                   | Yes                 | 2082 (86.2)                       | 887 (79.8)                      |
|                                                                                                 | No                  | 326 (13.5)                        | 222 (20)                        |
|                                                                                                 | Refused             | 7 (0.3)                           | 2 (0.2)                         |
| <b>Did your HIV care provider spend the right amount of time with you?</b>                      | Yes                 | 2179 (90.2)                       | 900 (81)                        |
|                                                                                                 | No                  | 232 (9.6)                         | 209 (18.8)                      |
|                                                                                                 | Refused             | 4 (0.2)                           | 2 (0.2)                         |
| <b>Overall, how did you feel about the care you received today?</b>                             | Happy               | 2231 (92.4)                       | 983 (88.5)                      |
|                                                                                                 | Unhappy             | 178 (7.4)                         | 123 (11.1)                      |
|                                                                                                 | Refused             | 6 (0.2)                           | 5 (0.4)                         |
| <b>Overall, were you satisfied with all your HIV care providers today?</b>                      | Yes                 | 2206 (91.4)                       | 906 (81.5)                      |
|                                                                                                 | No                  | 208 (8.6)                         | 202 (18.2)                      |
|                                                                                                 | Refused             | 1 (0.0)                           | 3 (0.3)                         |
| <b>I witnessed HIV care providers behaving rudely during my visit today</b>                     | No                  | 2251 (93.2)                       | 928 (83.5)                      |
|                                                                                                 | Yes                 | 163 (6.8)                         | 182 (16.4)                      |
|                                                                                                 | Refused             | 1 (0.0)                           | 1 (0.1)                         |
| <b>Were your lab results lost?</b>                                                              | No                  | 2143 (88.7)                       | 985 (88.7)                      |
|                                                                                                 | Yes                 | 268 (11.1)                        | 126 (11.3)                      |
|                                                                                                 | Not picking up      | 4 (0.2)                           | 0 (0)                           |
| <b>Were you able to pick up your medicine today?</b>                                            | Yes                 | 2366 (98.0)                       | 1087 (97.8)                     |
|                                                                                                 | No                  | 48 (2.0)                          | 24 (2.2)                        |
|                                                                                                 | Not Picking Up Meds | 1 (0.0)                           | 0 (0)                           |

**Effects of training on response patterns: sum score and prevalence ratios**

In adjusted models, TECs overall reported poor experiences in care: 1.64 times as frequently as UEC respondents (Sum Score Rate Ratio [RR]: 1.64 [95% CI: 1.39-1.94] (Fig 1, Supplementary Table S1), and reported an increased prevalence of poor experiences in care quality compared to



1  
2  
3 312 untrained across almost all questions. For example; among TECs compared to UECs, there was an  
4  
5 increased prevalence of reports of not being greeted in a way that made them feel welcome (adjusted  
6 313  
7  
8 314 Prevalence Ratio [aPR]: 1.71 [95% CI: 1.20-2.44]), reporting being dissatisfied with all their HIV  
9  
10 315 care providers during their HIV care visit (aPR: 2.06 [95% CI: 1.61-2.63]) and witnessing any  
11  
12 316 providers behaving rudely during their visit (aPR: 2.28 [95% CI: 1.63-3.19]) (Fig 1, Supplementary  
13  
14 Table S1).

### 18 319 **Impact of training across age, sex, and gender to differences in responses**

20  
21 320 In stratified analysis of the impact of training on the sum score, training was consistently  
22  
23 321 associated with increased identification of poor experiences in care across all subgroups apart from  
24  
25 322 those aged 50 years or older and those with no education. We also observed that training had a larger  
26  
27 323 impact among females compared to males, those with a primary education only, and among  
28  
29 324 individuals presenting at smaller facilities (Fig 2). We observed similarities in responses on the  
30  
31 impact of training on different age categories, sex, care status and different levels of education when  
32 325  
33 we looked at individual questions except for the question on providers spending the right amount of  
34 326  
35 time where we found that females were twice as likely to report lapses with care compared to males  
36  
37 327 (Supplementary Figure 1). Using TECs gave worse assessments of patient experience at the facility-  
38  
39 328 level regardless of facility size compared to UECs (Fig 3, Supplementary Figure 2).

## 43 330 **DISCUSSION**

44 331  
45  
46 332  
47  
48  
49 333 Disengaged patients often express a disconnect between their care expectations and the  
50  
51 provider's style, hence experience is bound to vary across facilities [7]. This disconnect can lead to  
52 334  
53 dissatisfaction with HIV services which can often lead to patients dropping out of care[7,10,27]. A  
54 335  
55

1  
2  
3 336 brief training for patients living with HIV on how to evaluate the quality and experience of routine  
4  
5  
6 337 care changed patient experience reports compared to untrained patients using the same instrument.  
7  
8 338 Patients who underwent a brief training identified more lapses in care across most questions. Women  
9  
10 339 and young people were more likely to report critical responses after training - consistent with the  
11  
12 340 idea that those who feel least empowered underwent the biggest change. Differences were also  
13  
14  
15 341 bigger for questions in which social desirability is likely to operate. For example, larger differences  
16  
17 342 were observed for witnessing rude behaviour, while no differences were observed for more objective  
18  
19 343 questions such as whether lab results were lost.  
20  
21  
22

23 344 Improving HIV health outcomes requires new strategies that minimise methodological biases  
24  
25 345 and includes everyone the patient encounters during their visit, including clinical officers, doctors,  
26  
27 346 nurses, data clerks, and lay HCWs. Our TEC approach could contribute to getting a true reflection  
28  
29  
30 347 of how much value patients place on things such as effective communication, being greeted  
31  
32 348 appropriately, or being treated with care and respect at all these different touch points. Involving  
33  
34 349 patients in their own care and design of health services has been linked to improved HIV care  
35  
36 350 retention and patient outcomes, such as higher viral suppression rates [28–30]. As progress is being  
37  
38  
39 351 made towards UNAIDS 95-95-95 targets, the global HIV sector is constantly reviewing priorities  
40  
41 352 and challenges for optimal engagement in care [31,32]. Patient experience is a key indicator of  
42  
43 353 healthcare quality for meeting the 95-95-95 targets: delivering services patients need, can access,  
44  
45  
46 354 and address wider determinants of poor health. Clinicians and health systems must address HIV  
47  
48 355 patients' needs from diagnosis to death to ensure healthy ageing and viral suppression. Other  
49  
50 356 outcomes in Zambia [10,33,34] show that lifelong needs vary by facility, highlighting the  
51  
52  
53 357 importance of metrics that measure patient experience accurately. We have shown that it is feasible  
54  
55  
56  
57  
58  
59  
60

1  
2  
3 358 to involve patients in assessing the quality of care and this could potentially lead to involvement of  
4  
5 359 patients in the redesign of healthcare services.

7  
8 360 Because HIV care is longitudinal, SP, who are often used to evaluate episodic care, require  
9  
10 361 highly skilled people to pose as a simulated patient making one visit to multiple clinics, posing  
11  
12 362 practical implementation challenges in our setting[17–22]. Contrary to SP, we evaluated care quality  
13  
14  
15 363 without using simulated patients and administered the survey once among people in long term care.  
16  
17 364 Using real patients instead of simulated ones drawn from outside the true patient population, we  
18  
19 365 would argue, made our TEC approach more applicable and reproducible in clinical settings. We  
20  
21  
22 366 were able to record HCW behaviour in a typical HIV context using this concealment method,  
23  
24 367 potentially reducing the impact of the Hawthorne effect. Our TECs also consistently identified more  
25  
26 368 lapses in care, potentially reducing social desirability bias and ability to identify issues at the facility.  
27  
28  
29 369 Even though training takes time, the increased quality of our measurement allows one to perform  
30  
31 370 fewer surveys. With traditional approaches like exit surveys, one would require a larger sample size,  
32  
33 371 but this does not address bias [35].

34  
35 372 Our findings are consistent with a study done in South Africa which found that non-clinical  
36  
37  
38 373 dimensions of care play a bigger role in determining an overall satisfactory experience for  
39  
40 374 standardised patients when compared to untrained patients[35]. However, our findings may  
41  
42 375 contradict previous suggestions that tailoring support to individuals to build skills and confidence  
43  
44  
45 376 through patient activation can lead to trained/informed patients reporting a better experience than  
46  
47 377 untrained/ uninformed [36]. TECs cared about the following non-clinical aspects of care: rude  
48  
49 378 providers, being satisfied with HIV care providers, and spending enough time with providers. This  
50  
51  
52 379 finding is consistent with a previous study in Zambia, where patients reported rude HCWs deterring  
53  
54 380 HIV care engagement [7,9,10]. This could mean that studies assessing patient experience with TEC  
55  
56  
57  
58  
59  
60

1  
2  
3 381 could focus on a few questions to save time and resources. Questions like, "Did you pick up your  
4  
5 382 medicine or lab results at your visit?" may not add much to a TEC survey because they are definitive,  
6  
7  
8 383 and training appears to influence subjective care dimensions.  
9

10 384 Women TECs were generally more critical about the care they received and would likely  
11  
12 385 provide a more accurate reflection of the health system, possibly because they have better health-  
13  
14  
15 386 seeking behaviour than men, which may be strongly influenced by local gender norms and health  
16  
17 387 service structures designed to engage women of reproductive age [37]. There is some consistency  
18  
19 388 with other findings that women may be more interested in their care than men, especially in facilities  
20  
21  
22 389 that provide integrated services for women and their children [8,38]. Despite longer wait times,  
23  
24 390 women were more satisfied with integrated facilities [39]. In addition, middle-aged people between  
25  
26 391 40-50 benefited the most from training. Compared to older people over 50, younger people under  
27  
28  
29 392 30 were less satisfied with the care they received and often felt they were not greeted by a HCW  
30  
31 393 during their visit. This finding is consistent with cultural norms where younger people are less  
32  
33 394 respected[40]. Given the current strategy of targeting young people, who account for most new  
34  
35 395 infections, these findings suggest an important new approach to identifying what young people value  
36  
37  
38 396 most. Education level was among the strongest predictors of patient experience feedback. Well-  
39  
40 397 educated patients were found to have a less critical/better HIV care visit experience compared to  
41  
42 398 participants with lower levels of educational attainment. This difference in care experience report  
43  
44  
45 399 may be associated, at least in part, with the HCW perception of the patient in the facility. Research  
46  
47 400 conducted in Nigeria discovered that people with higher levels of education are frequently given  
48  
49 401 better and more considerate treatment by HCW, hence limited by a form of discrimination/  
50  
51  
52 402 socioeconomic status bias [41,42].  
53  
54  
55  
56  
57  
58  
59  
60

1  
2  
3 403 The observed effect of training on patient experience is likely multifaceted potentially  
4  
5  
6 404 stemming from increased attention and recall to the exit survey items which solicited a feeling of  
7  
8 405 empowerment to be more critical of the care received. In future studies, patient activation should be  
9  
10 406 measured as an outcome to see how training changes the patient's engagement with their care over  
11  
12 407 time [36]. Further research is required into why women TECs reported poorer experiences with care  
13  
14  
15 408 than men. Other studies that have used SP to assess medical students' performance showed that  
16  
17 409 women were more critical on certain aspects of care. These studies also recommend matching of  
18  
19 410 SPs to clinicians by sex [43], something we were not able to do given the nature of our study in  
20  
21  
22 411 primary health facilities where we assessed interpersonal communication with HCWs at all levels.  
23  
24 412 Perhaps our findings call for more investigation into the integration of women's services, such as  
25  
26 413 family planning and children's services with HIV care given some studies have shown this can  
27  
28  
29 414 improve patient satisfaction.

### 30 31 415 **Limitations**

32  
33 416 Our findings should be interpreted with caution due to the following limitations. Because this  
34  
35 417 was the first time such a study was done, we recruited educated participants who were able to read  
36  
37  
38 418 and write, perceived to have good recall ability and were able to comprehend things. Our study was  
39  
40 419 only done in Lusaka province in facilities that were largely urban except for one facility which was  
41  
42 420 peri-urban hence it is hard to generalise these findings. Another limitation in our approach is the  
43  
44  
45 421 one-time cross-sectional nature of our measurements among people in long term HIV care. If more  
46  
47 422 measures were collected from each TEC, we may well see them being activated in a way that results  
48  
49 423 in an improvement in their experience based on the skills they develop to seek better care from  
50  
51  
52 424 providers which ultimately would improve their retention in care. Despite its limitations, the TEC  
53  
54 425 method provides valuable information about healthcare quality, even though it is limited to  
55  
56  
57  
58  
59  
60

1  
2  
3 426 situations where "walk-ins" are permitted. Our approach only focused on real patients accessing  
4  
5  
6 427 care and we did not manipulate any patient files, so it is possible that some TECs were known to the  
7  
8 428 facility as patients accessing chronic care. Our approach does require a trained interviewer to speak  
9  
10 429 with TECs after their visits, but this is not any different to what already exists. In future, it may be  
11  
12 430 worth using the domains in the national HIV guidelines as the gold standard, but we did not do this  
13  
14  
15 431 as our aim was to come up with a low-cost approach that can easily be rolled out. In addition, the  
16  
17 432 concept of patient centred care is still catching on in Zambia. Our TEC approach can be used to  
18  
19 433 further the knowledge in provider attitudes to other relatively new approaches to delivering quality  
20  
21  
22 434 HIV care such as differentiated service delivery (DSD) for stable patients by assessing whether  
23  
24 435 HCWs follow guidelines when offering this [32]. We also see an opportunity to assess provider  
25  
26 436 patient communication of viral load laboratory results by use of a universal script for each TEC to  
27  
28  
29 437 assess if they are communicated to and if unsuppressed but adherent, what procedures followed.

## 31 32 438 **Conclusion**

33  
34  
35 439 TEC offers pragmatic methods for health systems in low-income countries to assess non-  
36  
37  
38 440 clinical dimensions of care (communication, respect, and autonomy) which are grounded on the  
39  
40 441 concept of health-system responsiveness and could be critical to the transformation of low-quality  
41  
42 442 health systems to high quality ones[44]. Hawthorne effects and social desirability biases may be  
43  
44  
45 443 mitigated using TECs. We were able to capture HCWs behaviour in a normal day to day setting  
46  
47 444 [45]. Our findings suggest that TECs provide a more critical appraisal of some aspects of the quality  
48  
49 445 of HIV care. It provides new insights in the Zambian context on what patients' value when they  
50  
51  
52 446 interact with the health system. This could be important given the need to reduce loss to follow up  
53  
54 447 among new ART clients who disengage within the first 6 months of treatment due to a bad first  
55  
56  
57  
58  
59  
60

1  
2  
3 448 encounter with the health system. Our TEC approach could be used to assess reengagement  
4  
5 449 interventions. The fact that TECs had a better understanding of the items solicited or felt empowered  
6  
7  
8 450 to be more critical shows that the training we provided worked. This low-cost method could be  
9  
10 451 reproduced in other routine settings and presents an opportunity to further institutionalise patient  
11  
12 452 centred care by evaluating what happens at the point of contact between the patient, the health  
13  
14  
15 453 facility, and the health provider. The implications are that it provides an opportunity to improve HIV  
16  
17 454 care, meet patients' expectations and can serve as a monitoring tool for healthcare performance.  
18  
19 455 Coupled with the recent approaches to client led monitoring in HIV care, our approach can be used  
20  
21  
22 456 to enhance decision making that considers patients' involvement.  
23  
24 457  
25  
26 458  
27  
28 459  
29  
30  
31 460  
32  
33 461  
34  
35 462  
36  
37  
38 463  
39  
40 464  
41  
42 465  
43  
44  
45 466  
46  
47 467  
48  
49 468  
50  
51 469  
52  
53  
54 470  
55  
56  
57  
58  
59  
60

### **Data Availability Statement**

The Government of Zambia allows data sharing when applicable local conditions are satisfied. In this case, the data from the study will be made available to any interested researchers upon request. The CIDRZ Ethics and Compliance Committee is responsible for approving such request. To request data access, one must write to the Secretary to the Committee/Head of Research Operations, Mrs. Hope Chinganya ([Hope.Chinganya@cidrz.org](mailto:Hope.Chinganya@cidrz.org)) mentioning the intended use for the data. The Committee will then facilitate review and authorization to release the data as requested. Data requests must include contact information, a research project title, and a description of the intended use.

### **Funding**

This work was supported, in whole or in part, by the Bill & Melinda Gates Foundation [INV-010563]. Under the grant conditions of the Foundation, a Creative Commons Attribution 4.0 Generic License has already been assigned to the Author Accepted Manuscript version that might arise from this submission. This work was also supported by the National Center for Advancing Translational Sciences (grant KL2 TR002346 to Dr Mody) and the National Institute of Allergy and Infectious Diseases (grant K24 AI134413 to Dr Geng). The funders had no role in study design, data collection and analysis, decision to publish, or preparation of the manuscript.

### **Disclaimer**

The contents of this paper are the sole responsibility of the authors and do not necessarily reflect the views of the Bill & Melinda Gates Foundation.

**Competing interest:** Non declared



## Acknowledgements

We would like to thank recipients of care for taking part in this study. We would like to thank the  
Zambian Ministry of Health, the US President's Emergency Plan for AIDS Relief (PEPFAR)  
through the US Centers for Disease Control and Prevention/Zambia (CDC) and the Centre for  
Infectious Disease Research in Zambia for their leadership in ensuring those in HIV care continue  
to receive life-saving HIV treatment. We would also like to thank the healthcare workers who  
continued to faithfully deliver HIV care in the face of the COVID-19 pandemic

## Contributors

KS: guarantor, lead author, conducted all analyses, led data management activities, field  
coordination of activities and designed data collection tools. JMP: field coordination of data, assisted  
with analysis and revising it critically for important intellectual content, designed data collection  
tools. AM: assisted with analysis, framing, and revising it critically for important intellectual content.  
BR: final approval for publication, assisted with framing and revising it critically for important  
intellectual content CB: field coordination of data quality processes and data acquisition IEW:  
drafted statistical analysis plan, assisted with conceptualisation and interpretation of data. JM:  
assisted with data acquisition and cleaning, field coordination of data quality processes. SS: led  
intervention implementation, project administration and data curation. LKB, NM, AS: cognitively  
tested data collection tools, assisted with conceptualization, underlying data processes, and assisted  
with writing and data interpretation. DM, MM-M: advised implementation details. AW, JH: assisted  
with framing and revising it critically for important intellectual content. CBM: lead for underlying  
data processes and assisted with funding acquisition. CBH: funding acquisition, assisted with  
conceptualisation and advised regarding intervention implementation details. IS: funding

1  
2  
3 516 acquisition, assisted with conceptualisation and manuscript writing. EHG: funding acquisition, led  
4  
5 517 conceptualisation and advised on all analyses, final approval for publication.  
6  
7

### 8 518 **Statement of Ethics Approval**

9 519

10 520 Ethics approval to conduct this research was granted by the Zambian Ministry of Health,  
11  
12 521 National Health Research Authority, and the institutional review boards of the University of Zambia  
13  
14 (008-03-19), the University of Alabama at Birmingham (300003282) and the London School of  
15 522 Hygiene and Tropical Medicine (21384).  
16  
17 523  
18  
19  
20 524  
21  
22 525  
23  
24 526  
25  
26  
27 527  
28  
29 528  
30  
31 529  
32  
33 530  
34  
35  
36 531  
37  
38 532  
39  
40 533  
41  
42  
43  
44  
45  
46  
47  
48  
49  
50  
51  
52  
53  
54  
55  
56  
57  
58  
59  
60

## REFERENCES

- 1 Institute of Medicine & Committee on Quality of Health Care in America. *Crossing the Quality Chasm: A New Health System for the 21st Century*. 2001. doi:10.1136/bmj.323.7322.1192
- 2 World Health Organization. Maintaining and Improving Quality of Care Within HIV Clinical Services. 2019. <http://apps.who.int/bookorders>. (accessed 11 Mar 2020).
- 3 Edmonds KA, Aspiras OG, Rose JP, *et al*. Cross-sectional evaluation of perceived health care provider engagement, self-efficacy, and ART adherence in people living with HIV/AIDS. *AIDS Care* 2021;**33**:154–8. doi:10.1080/09540121.2019.1703889
- 4 Bakken S, Holzemer WL, Brown MA, *et al*. Relationships between perception of engagement with health care provider and demographic characteristics, health status, and adherence to therapeutic regimen in persons with HIV/AIDS. *AIDS Patient Care STDS* 2000;**14**:189–97. doi:10.1089/108729100317795
- 5 Okoli C, Brough G, Allan B, *et al*. Shared Decision Making Between Patients and Healthcare Providers and its Association with Favorable Health Outcomes Among People Living with HIV. *AIDS Behav* 2021;**25**:1384–95. doi:10.1007/s10461-020-02973-4
- 6 Kwan A, Daniels B, Bergkvist S, *et al*. Use of standardised patients for healthcare quality research in low- and middle-income countries. *BMJ Glob Health* 2019;**4**:e001669. doi:10.1136/bmjgh-2019-001669
- 7 Mwamba C, Sharma A, Mukamba N, *et al*. ‘They care rudely!’: resourcing and relational health system factors that influence retention in care for people living with HIV in Zambia. *BMJ Glob Health* 2018;**3**:e001007. doi:10.1136/bmjgh-2018-001007
- 8 Topp SM, Mwamba C, Sharma A, *et al*. Rethinking retention: Mapping interactions between multiple factors that influence long-term engagement in HIV care. *PLoS One* 2018;**13**:e0193641. <https://doi.org/10.1371/journal.pone.0193641>
- 9 Zanolini A, Sikombe K, Sikazwe I, *et al*. Understanding preferences for HIV care and treatment in Zambia: Evidence from a discrete choice experiment among patients who have been lost to follow-up. *PLoS Med* 2018;**15**:e1002636. doi:10.1371/JOURNAL.PMED.1002636
- 10 Sikazwe I, Eshun-Wilson I, Sikombe K, *et al*. Patient-reported Reasons for Stopping Care or Switching Clinics in Zambia: A Multi-site, Regionally Representative estimate using a multi-stage sampling-based approach in Zambia. *Clinical Infectious Diseases* Published Online First: 2020. doi:10.1093/cid/ciaa1501
- 11 Mody A, Sikombe K, Beres LK, *et al*. Profiles of HIV Care Disruptions Among Adult Patients Lost to Follow-up in Zambia. *JAIDS Journal of Acquired Immune Deficiency Syndromes* 2020;**Public Ah**. doi:10.1097/qai.0000000000002530
- 12 Porter LE, Bouey PD, Curtis S, *et al*. Beyond indicators: Advances in global HIV monitoring and evaluation during the PEPFAR era. *J Acquir Immune Defic Syndr (1988)* 2012;**60**. doi:10.1097/QAI.0b013e31825cf345
- 13 MILLER FRANCO L, FRANCO C, KUMWENDA N, *et al*. Methods for assessing quality of provider performance in developing countries. *International Journal for Quality in Health Care* 2002;**14**:17–24. doi:10.1093/intqhc/14.suppl\_1.17
- 14 Onishi J, Gupta S, Peters DH. Comparative analysis of exit interviews and direct clinical observations in Pediatric Ambulatory Care Services in Afghanistan. *International Journal for Quality in Health Care* 2011;**23**:76–82. doi:10.1093/intqhc/mzq074
- 15 Luck J, Peabody JW. Using standardised patients to measure physicians’ practice: validation study using audio recordings. *BMJ* 2002;**325**:679. doi:10.1136/bmj.325.7366.679

- 1  
2  
3 16 Beullens J, Rethans JJ, Goedhuys J, *et al*. The use of standardized patients in research in general  
4 practice. *Fam Pract* 1997;**14**:58–62. doi:10.1093/fampra/14.1.58
- 5 17 Weiner SJ, Schwartz A. Directly observed care: Can unannounced standardized patients address a  
6 gap in performance measurement? *J Gen Intern Med* 2014;**29**:1183–7. doi:10.1007/s11606-014-  
7 2860-7
- 8 18 Nestel D, Bearman M. *Simulated Patient Methodology: Theory, Evidence and Practice*. 2014.  
9 doi:10.1002/9781118760673
- 10 19 Larsen A, Wilson KS, Kinuthia J, *et al*. Standardised patient encounters to improve quality of  
11 counselling for pre-exposure prophylaxis (PrEP) in adolescent girls and young women (AGYW)  
12 in Kenya: study protocol of a cluster randomised controlled trial. *BMJ Open* 2020;**10**:e035689–  
13 e035689. doi:10.1136/bmjopen-2019-035689
- 14 20 Daniels B, Dolinger A, Bedoya G, *et al*. Use of standardised patients to assess quality of  
15 healthcare in Nairobi, Kenya: A pilot, cross-sectional study with international comparisons. *BMJ*  
16 *Glob Health* Published Online First: 2017. doi:10.1136/bmjgh-2017-000333
- 17 21 Zabar S, Hanley K, Stevens D, *et al*. Unannounced standardized patients: A promising method of  
18 assessing patient-centered care in your health care system. *BMC Health Serv Res* 2014;**14**.  
19 doi:10.1186/1472-6963-14-157
- 20 22 Boffa J, Moyo S, Chikovore J, *et al*. Quality of care for tuberculosis and HIV in the private health  
21 sector: a cross-sectional, standardised patient study in South Africa. *BMJ Glob Health*  
22 2021;**6**:e005250. doi:10.1136/bmjgh-2021-005250
- 23 23 Wachira J, Middlestadt S, Reece M, *et al*. Psychometric assessment of a physician-patient  
24 communication behaviors scale: The perspective of adult HIV patients in Kenya. *AIDS Res Treat*  
25 2013;**2013**. doi:10.1155/2013/706191
- 26 24 Campbell C, Lockyer J, Laidlaw T, *et al*. Assessment of a matched-pair instrument to examine  
27 doctor–patient communication skills in practising doctors. *Med Educ* 2007;**41**:123–9.  
28 doi:https://doi.org/10.1111/j.1365-2929.2006.02657.x
- 29 25 Bieber C, Müller KG, Nicolai J, *et al*. How Does Your Doctor Talk with You? Preliminary  
30 Validation of a Brief Patient Self-Report Questionnaire on the Quality of Physician–Patient  
31 Interaction. *J Clin Psychol Med Settings* 2010;**17**:125–36. doi:10.1007/s10880-010-9189-0
- 32 26 Zou G. A Modified Poisson Regression Approach to Prospective Studies with Binary Data. *Am J*  
33 *Epidemiol* 2004;**159**:702–6. doi:10.1093/aje/kwh090
- 34 27 Shabalala FS, Vernooij E, Pell C, *et al*. Understanding reasons for discontinued antiretroviral  
35 treatment among clients in test and treat: a qualitative study in Swaziland. *J Int AIDS Soc*  
36 2018;**21**:e25120. doi:10.1002/jia2.25120
- 37 28 Grimsrud A, Bygrave H, Doherty M, *et al*. Reimagining HIV service delivery : the role of  
38 differentiated care from prevention to suppression. *J Acquir Immune Defic Syndr* 2016;:**10–2**.  
39 doi:10.7448/IAS.19.1.21484
- 40 29 Camlin CS, Neilands TB, Odeny TA, *et al*. Patient-reported factors associated with reengagement  
41 among HIV-infected patients disengaged from care in East Africa. *AIDS* 2015;:**1**.  
42 doi:10.1097/QAD.0000000000000931
- 43 30 Geng EH, Bangsberg DR, Musinguzi N, *et al*. Understanding Reasons for and Outcomes of  
44 Patients Lost to Follow-Up in Antiretroviral Therapy Programs in Africa Through a Sampling-  
45 Based Approach. *JAIDS Journal of Acquired Immune Deficiency Syndromes* 2010;**53**:405–11.  
46 doi:10.1097/QAI.0b013e3181b843f0
- 47 31 Ford N, Geng E, Ellman T, *et al*. Emerging priorities for HIV service delivery. *PLoS Med*  
48 2020;**17**:e1003028. doi:10.1371/JOURNAL.PMED.1003028
- 49  
50  
51  
52  
53  
54  
55  
56  
57  
58  
59  
60

- 1  
2  
3 32 Ehrenkranz P, Grimsrud A, Holmes CB, *et al.* Expanding the Vision for Differentiated Service  
4 Delivery: A Call for More Inclusive and Truly Patient-Centered Care for People Living With  
5 HIV. *J Acquir Immune Defic Syndr* 2021;**86**:147. doi:10.1097/QAI.0000000000002549  
6  
7 33 Holmes CB, Sikazwe I, Sikombe K, *et al.* Estimated mortality on HIV treatment among active  
8 patients and patients lost to follow-up in 4 provinces of Zambia: Findings from a multistage  
9 sampling-based survey. *PLoS Med* 2018;**15**:e1002489. doi:10.1371/journal.pmed.1002489  
10  
11 34 Sikazwe I, Eshun-Wilson I, Sikombe K, *et al.* Retention and viral suppression in a cohort of HIV  
12 patients on antiretroviral therapy in Zambia: Regionally representative estimates using a  
13 multistage-sampling-based approach. *PLoS Med* 2019;**16**:1–17.  
14 doi:10.1371/journal.pmed.1002811  
15  
16 35 Hompashe DM, Gerdttham U-G, Christian CS, *et al.* ‘The nurse did not even greet me’: how  
17 informed versus non-informed patients evaluate health systems responsiveness in South Africa.  
18 *BMJ Glob Health* 2021;**6**:e004360. doi:10.1136/bmjgh-2020-004360  
19  
20 36 Hibbard JH, Greene J. What The Evidence Shows About Patient Activation: Better Health  
21 Outcomes And Care Experiences; Fewer Data On Costs. *Health Aff* 2013;**32**:207–14.  
22 doi:10.1377/hlthaff.2012.1061  
23  
24 37 Colvin CJ. Strategies for engaging men in HIV services. *Lancet HIV*. 2019;**6**:e191–200.  
25 doi:10.1016/S2352-3018(19)30032-3  
26  
27 38 Kerkhoff AD, Sikombe K, Eshun-Wilson I, *et al.* Mortality estimates by age and sex among  
28 persons living with HIV after ART initiation in Zambia using electronic medical records  
29 supplemented with tracing a sample of lost patients: A cohort study. *PLoS Med*  
30 2020;**17**:e1003107.https://doi.org/10.1371/journal.pmed.1003107  
31  
32 39 Narasimhan M, Yeh PT, Haberlen S, *et al.* Integration of HIV testing services into family  
33 planning services: a systematic review. *Reprod Health* 2019;**16**:61. doi:10.1186/s12978-019-  
34 0714-9  
35  
36 40 Godia PM, Olenja JM, Lavussa JA, *et al.* Sexual reproductive health service provision to young  
37 people in Kenya; Health service providers’ experiences. *BMC Health Serv Res* 2013;**13**:1–13.  
38 doi:10.1186/1472-6963-13-476/TABLES/2  
39  
40 41 Roberts BW, Puri NK, Trzeciak CJ, *et al.* Socioeconomic, racial and ethnic differences in patient  
41 experience of clinician empathy: Results of a systematic review and meta-analysis. *PLoS One*  
42 2021;**16**:e0247259.https://doi.org/10.1371/journal.pone.0247259  
43  
44 42 Aloh HE, Onwujekwe OE, Aloh OG, *et al.* Impact of socioeconomic status on patient experience  
45 on quality of care for ambulatory healthcare services in tertiary hospitals in Southeast Nigeria.  
46 *BMC Health Serv Res* 2020;**20**:473. doi:10.1186/s12913-020-05332-0  
47  
48 43 Humphrey-Murto S, Touchie C, Wood TJ, *et al.* Does the gender of the standardised patient  
49 influence candidate performance in an objective structured clinical examination? *Med Educ*  
50 2009;**43**:521–5. doi:10.1111/j.1365-2923.2009.03336.x  
51  
52 44 Kruk ME, Gage AD, Arsenault C, *et al.* High-quality health systems in the Sustainable  
53 Development Goals era: time for a revolution. *Lancet Glob Health*. 2018;**6**:e1196–252.  
54 doi:10.1016/S2214-109X(18)30386-3  
55  
56 45 King JJC, Das J, Kwan A, *et al.* How to do (or not to do) ... using the standardized patient  
57 method to measure clinical quality of care in LMIC health facilities. *Health Policy Plan*  
58 2019;**34**:625–34. doi:10.1093/heapol/czz078  
59  
60

**Figure 1. Forest plot comparing responses from Trained Exit Clients (TEC) relative to Untrained Exit Clients (UEC) on 10 measures of clinic experience.** Points indicate the rate

1  
2  
3 ratio (for sum score) or prevalence ratio (for all others) for identifying a lapse in care in TEC  
4 surveys as compared to UEC. The sum score represents the total number of binary responses (yes  
5 vs no) across all clients in one group shown as a rate ratio. The red line indicates a rate or  
6 prevalence ratio of 1 and values greater than this indicates more lapses in care identified in TECs.  
7 Results are based on mixed-effects models adjusted for age, sex, education with a random effect at  
8 the facility.  
9  
10

11 **Figure 2. Impact of Training on Identifying Care Lapses Stratified by Subgroups (N=3480).**  
12 When all questions were collapsed into a Sum score among TEC, females were more likely to report  
13 lapses in care quality than males. We observed some level of interaction for care status, age category,  
14 education category and facility size.  
15  
16

17 **Figure 3. Bubble plot showing Trained Exit Sum Score vs Untrained Exit Sum Score.** Each  
18 bubble represents a single facility's performance. Each bubble's size indicates the number of patients  
19 at each facility with larger bubbles corresponding to larger facilities. The horizontal position notes  
20 the Untrained Exit Sum Score for all questions against the facility, and the vertical position notes  
21 the Trained Exit sum score at the same facility.  
22  
23  
24  
25  
26  
27  
28  
29  
30  
31  
32  
33  
34  
35  
36  
37  
38  
39  
40  
41  
42  
43  
44  
45  
46  
47  
48  
49  
50  
51  
52  
53  
54  
55  
56  
57  
58  
59  
60

1  
2  
3  
4  
5  
6  
7  
8  
9  
10  
11  
12  
13  
14  
15  
16  
17  
18  
19  
20  
21  
22  
23  
24  
25  
26  
27  
28  
29  
30  
31  
32  
33  
34  
35  
36  
37  
38  
39  
40  
41  
42  
43  
44  
45  
46  
47  
48  
49  
50  
51  
52  
53  
54  
55  
56  
57  
58  
59  
60

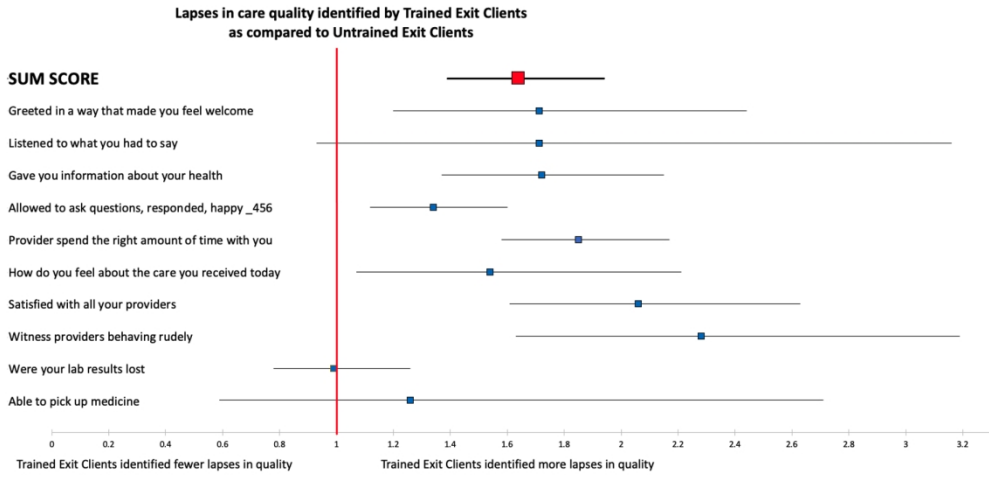

674x330mm (72 x 72 DPI)



1  
2  
3  
4  
5  
6  
7  
8  
9  
10  
11  
12  
13  
14  
15  
16  
17  
18  
19  
20  
21  
22  
23  
24  
25  
26  
27  
28  
29  
30  
31  
32  
33  
34  
35  
36  
37  
38  
39  
40  
41  
42  
43  
44  
45  
46  
47  
48  
49  
50  
51  
52  
53  
54  
55  
56  
57  
58  
59  
60

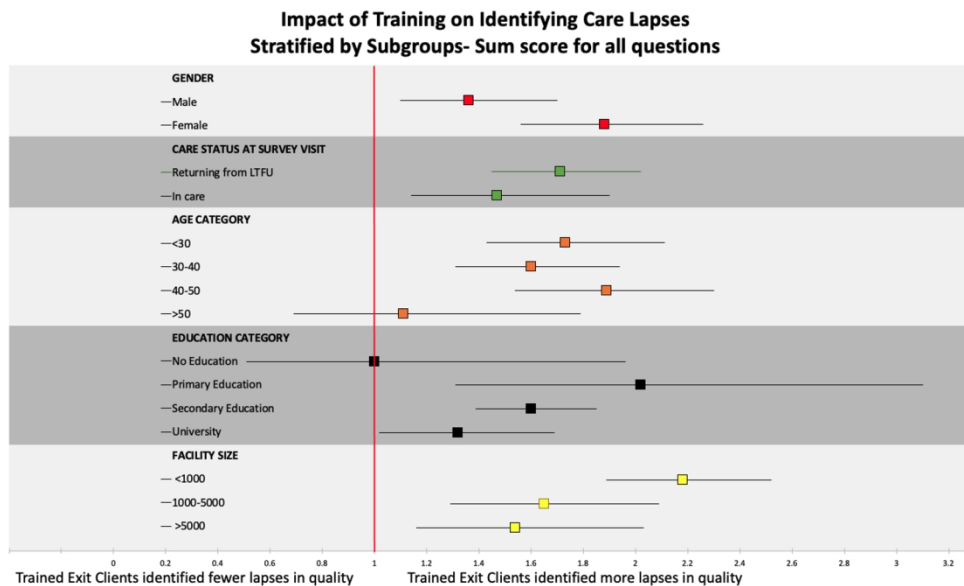

629x374mm (72 x 72 DPI)



1  
2  
3  
4  
5  
6  
7  
8  
9  
10  
11  
12  
13  
14  
15  
16  
17  
18  
19  
20  
21  
22  
23  
24  
25  
26  
27  
28  
29  
30  
31  
32  
33  
34  
35  
36  
37  
38  
39  
40  
41  
42  
43  
44  
45  
46  
47  
48  
49  
50  
51  
52  
53  
54  
55  
56  
57  
58  
59  
60

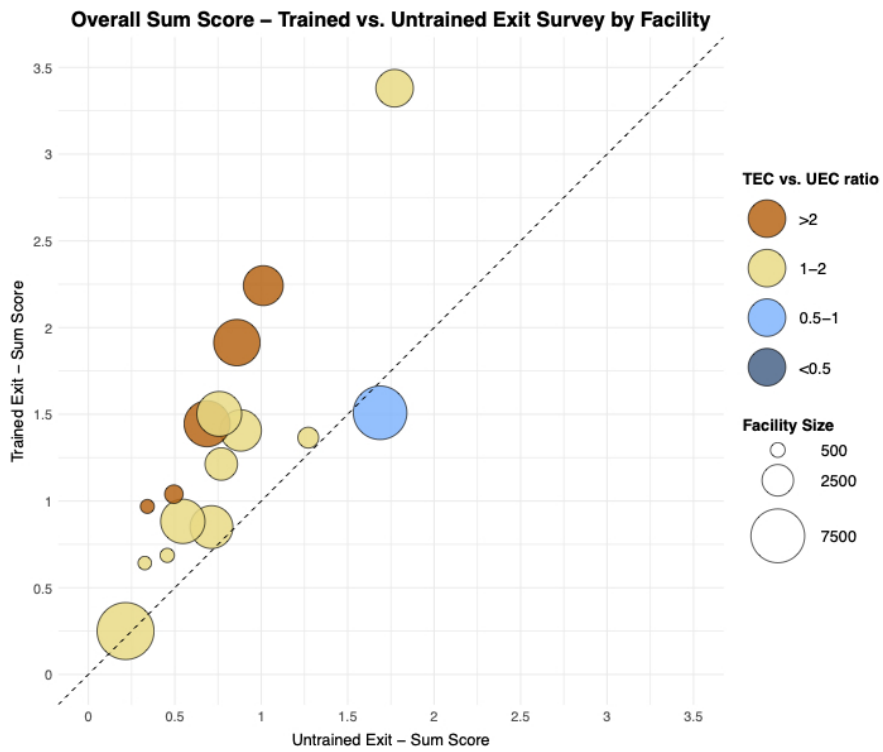

279x215mm (72 x 72 DPI)

## Supplementary Tables S1

**Supplementary Table S1. Mixed effect Poisson regression comparing 10 questions for Trained Exit Clients vs Untrained Exit Clients. Adjusted for age, sex, education, and study period.**

| Trained Exit Clients                                                                     | Prevalence ratio (PR) Unadjusted | P value | 95% Confidence Interval (CI) | PR-Adjusted | P value | 95% Confidence Interval (CI) | N    |
|------------------------------------------------------------------------------------------|----------------------------------|---------|------------------------------|-------------|---------|------------------------------|------|
| Sum score (Rate ratio)                                                                   | 1.73                             | <0.01   | 1.47-2.02                    | 1.64        | <0.01   | 1.39-1.94                    | 3480 |
| Did your HIV care provider greet you in a way that made you feel comfortable?            | 1.74                             | 0.01    | 1.24-2.44                    | 1.71        | <0.01   | 1.20-2.44                    | 3526 |
| Did your HIV care provider listen to what you said?                                      | 1.77                             | 0.09    | 0.91-3.45                    | 1.71        | 0.09    | 0.93-3.16                    | 3510 |
| Did your HIV care provider give you as much information about your health as you wanted? | 1.82                             | <0.01   | 1.43-2.33                    | 1.72        | <0.01   | 1.37-2.15                    | 3526 |
| Did your HIV care provider allow you to ask questions?                                   | 1.44                             | <0.01   | 1.20-1.73                    | 1.34        | <0.01   | 1.12-1.6                     | 3517 |
| Did your HIV care provider spend the right amount of time with you?                      | 1.94                             | <0.01   | 1.66-2.27                    | 1.85        | <0.01   | 1.58-2.17                    | 3520 |
| Overall, how did you feel about the care you received today?                             | 1.51                             | 0.02    | 1.06-2.16                    | 1.54        | 0.02    | 1.07-2.21                    | 3515 |
| Overall, were you satisfied with all your HIV care providers today?                      | 2.12                             | <0.01   | 1.68-2.66                    | 2.06        | <0.01   | 1.61-2.63                    | 3522 |
| I witnessed HIV care providers behaving rudely during my visit today                     | 2.39                             | <0.01   | 1.73-3.32                    | 2.28        | <0.01   | 1.63-3.19                    | 3524 |
| Were your lab results lost?                                                              | 0.99                             | 0.98    | 0.84-1.19                    | 0.99        | 0.93    | 0.78-1.26                    | 3522 |
| Were you able to pick up your medicine today?                                            | 1.04                             | 0.90    | 0.57-1.89                    | 1.26        | 0.55    | 0.59-2.71                    | 3525 |

1  
2  
3  
4  
5  
6  
7  
8  
9  
10  
11  
12  
13  
14  
15  
16  
17  
18  
19  
20  
21  
22  
23  
24  
25  
26  
27  
28  
29  
30  
31  
32  
33  
34  
35  
36  
37  
38  
39  
40  
41  
42  
43  
44  
45  
46  
47  
48  
49  
50  
51  
52  
53  
54  
55  
56  
57  
58  
59  
60

For peer review only

Supplementary Figure 1.

**Impact of Training on Identifying Care Lapses Stratified by Subgroups for 10 questions.** We observed some level of interaction for care status, age category, education category and facility size. Panel **a)** Greet you in a way that made you feel comfortable **b)** Listen to what you said **c)** Give you as much information about your health as you wanted **d)** Allowed you to ask questions, responded, happy q456 **e)** spend the right amount of time with you **f)** feel about the care you received today **g)** satisfied with all your HIV care providers today **h)** witnessed HIV care providers behaving rudely during my visit today **i)** lost lab results **j)** pick up meds

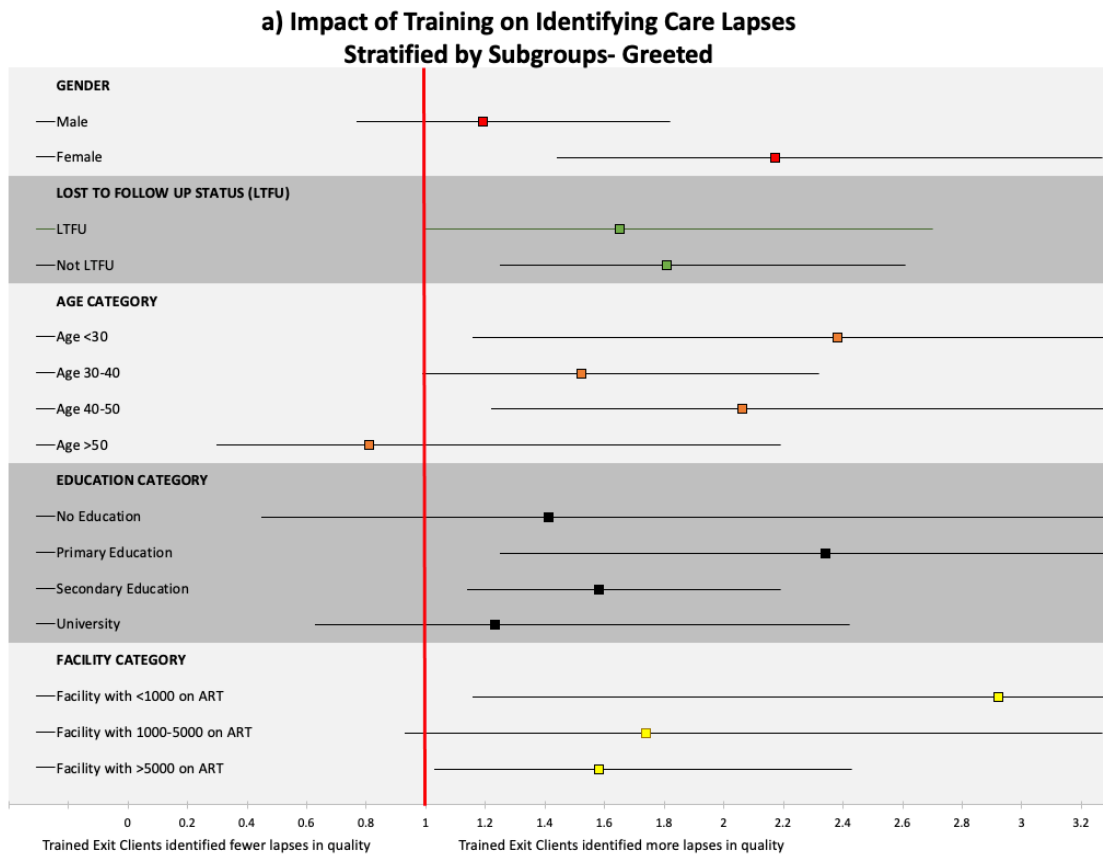

### b) Impact of Training on Identifying Care Lapses Stratified by Subgroups- Listened

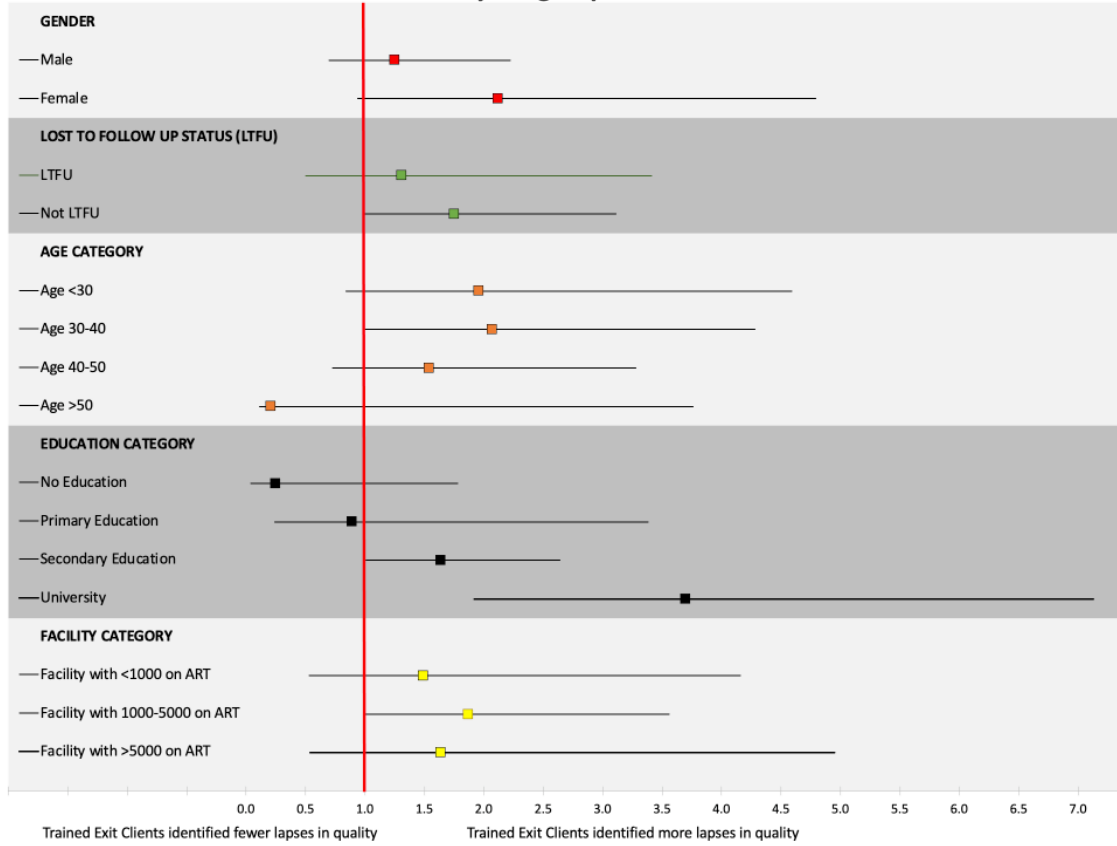

ew only

**c) Impact of Training on Identifying Care Lapses  
Stratified by Subgroups- Information**

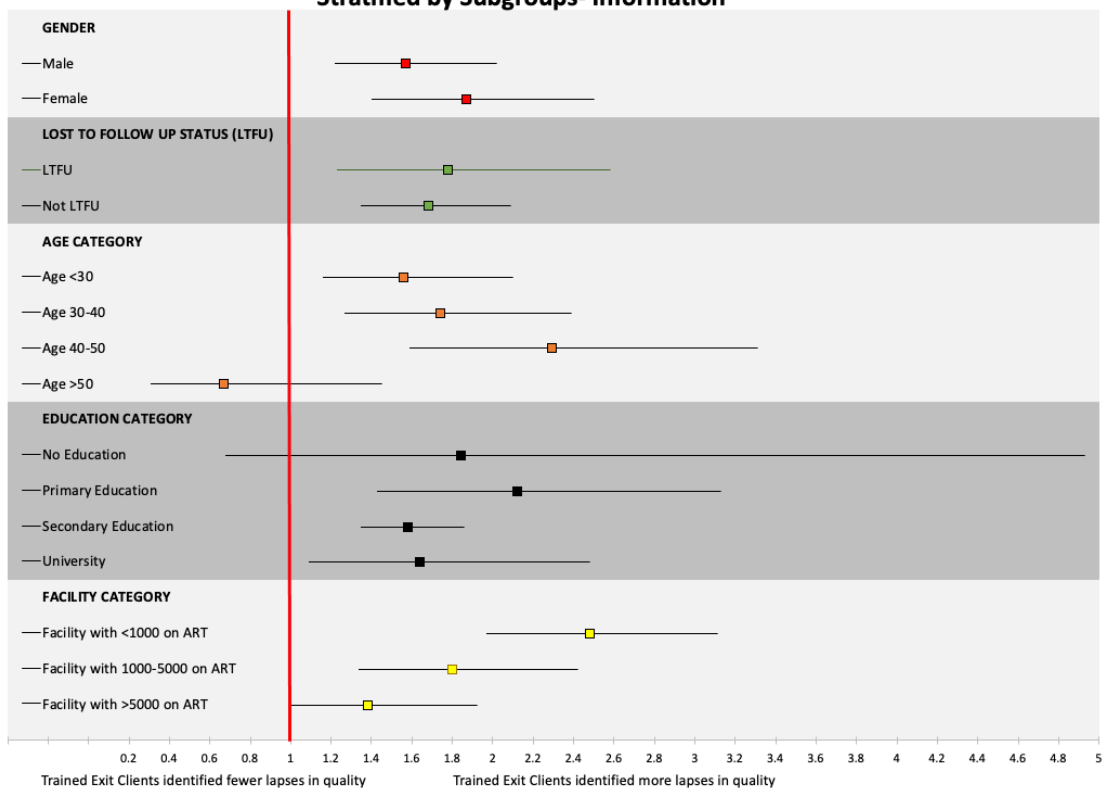

Review only

**d) Impact of Training on Identifying Care Lapses  
Stratified by Subgroups- Question\_456**

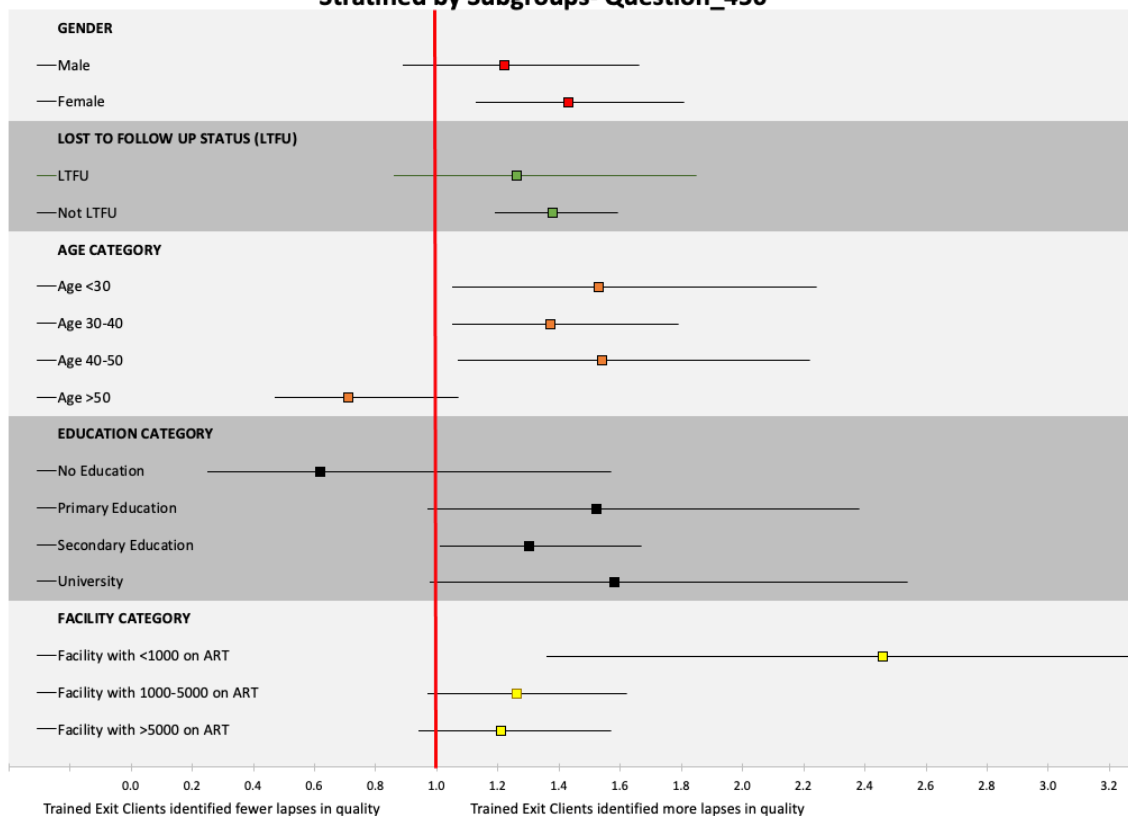

view only

**e) Impact of Training on Identifying Care Lapses  
Stratified by Subgroups- Spend time**

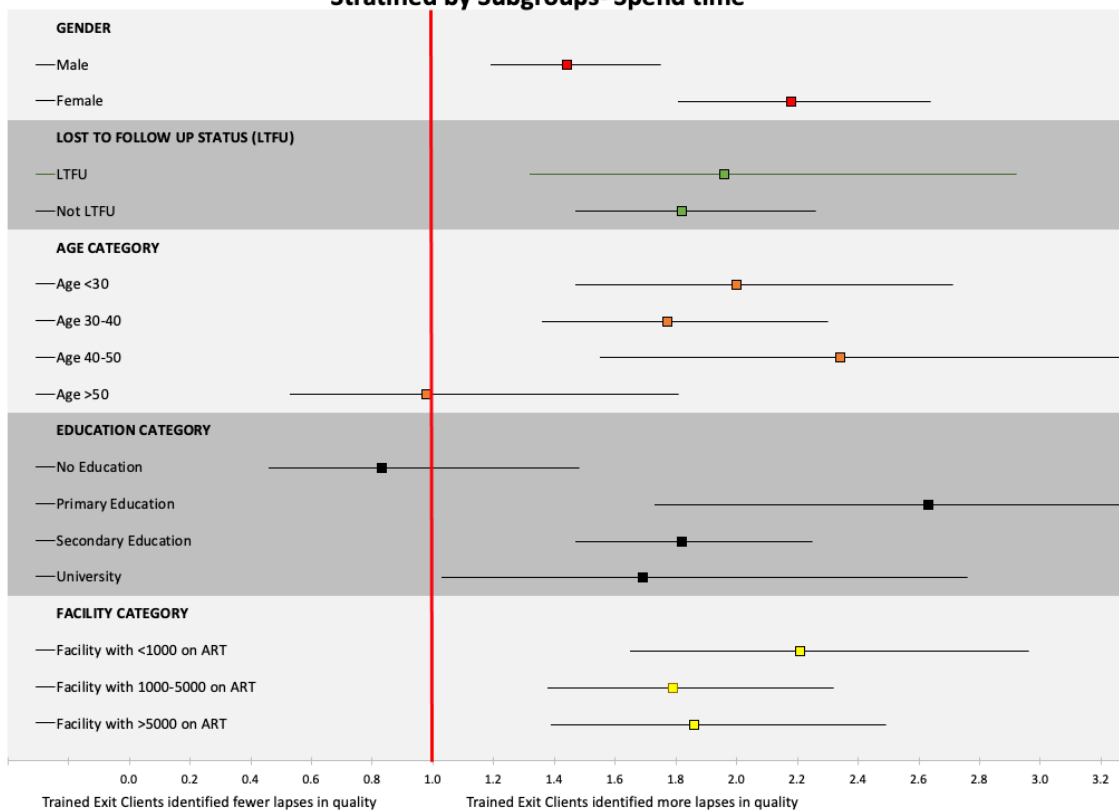

view only



### f) Impact of Training on Identifying Care Lapses Stratified by Subgroups- Feel about care

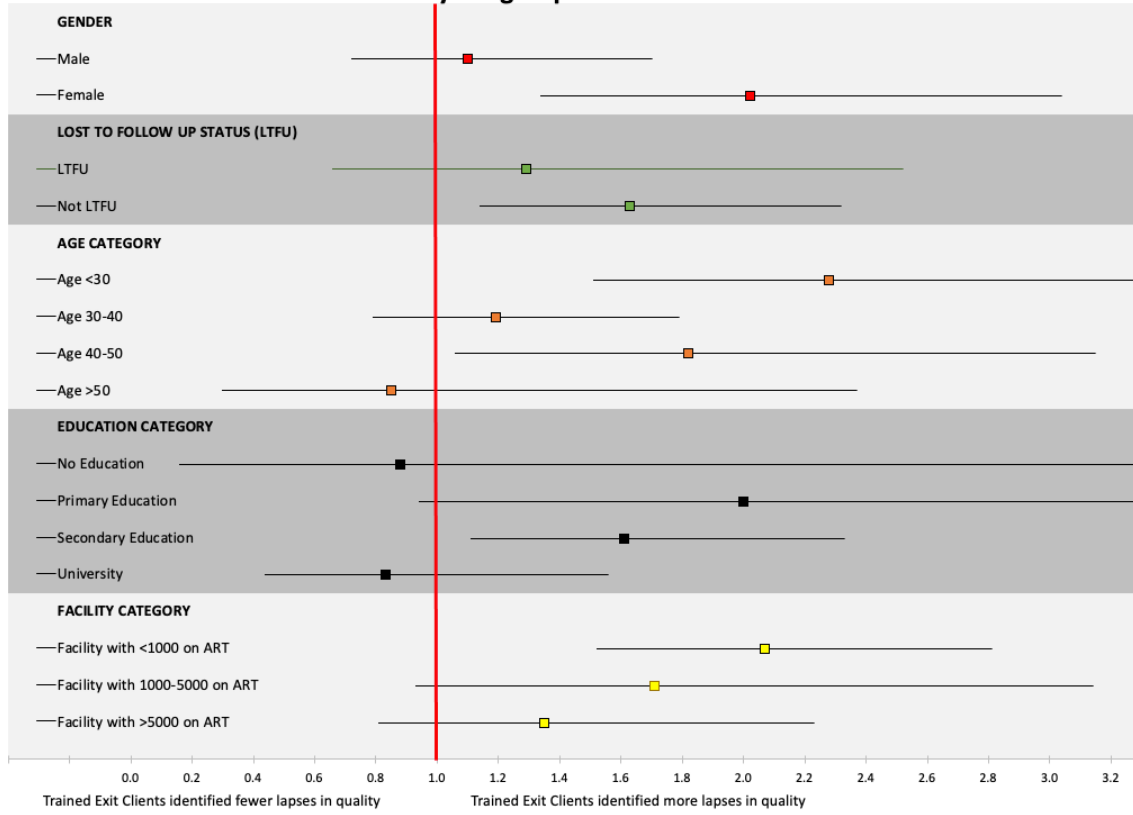

view only

**g) Impact of Training on Identifying Care Lapses  
Stratified by Subgroups- Satisfied**

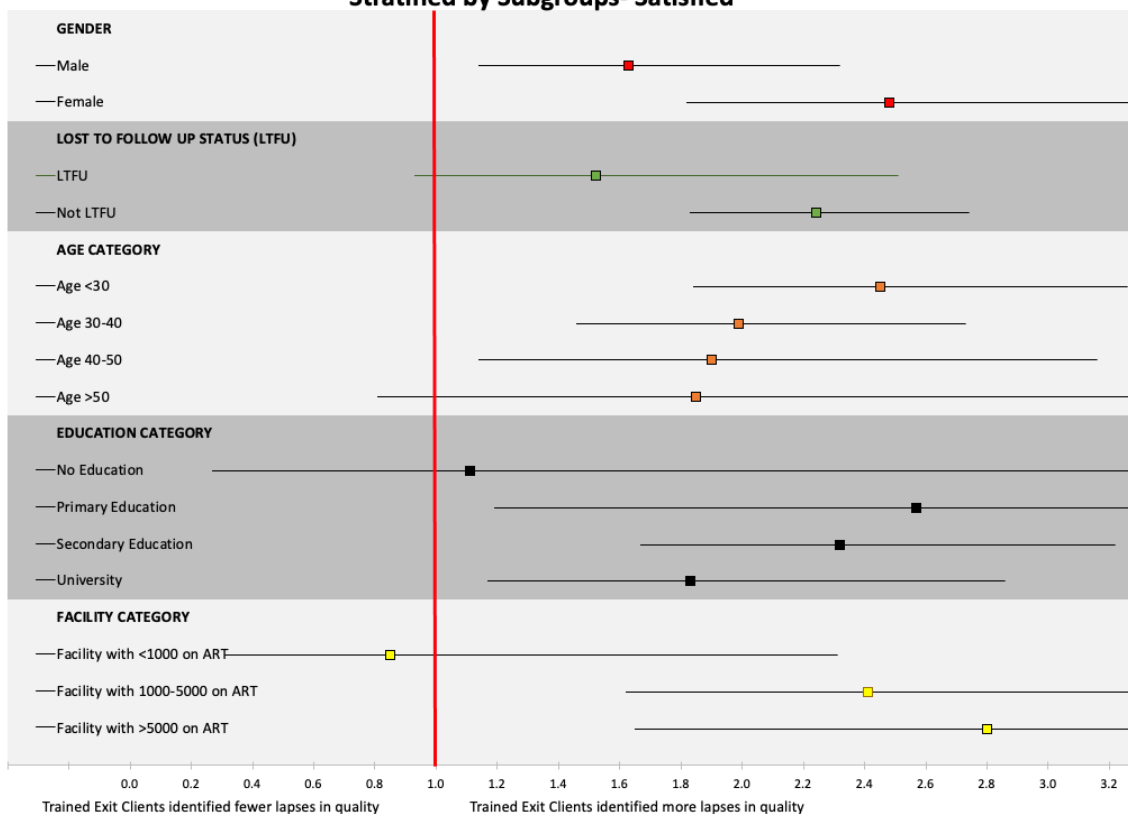

view only

### h) Impact of Training on Identifying Care Lapses Stratified by Subgroups- Rude

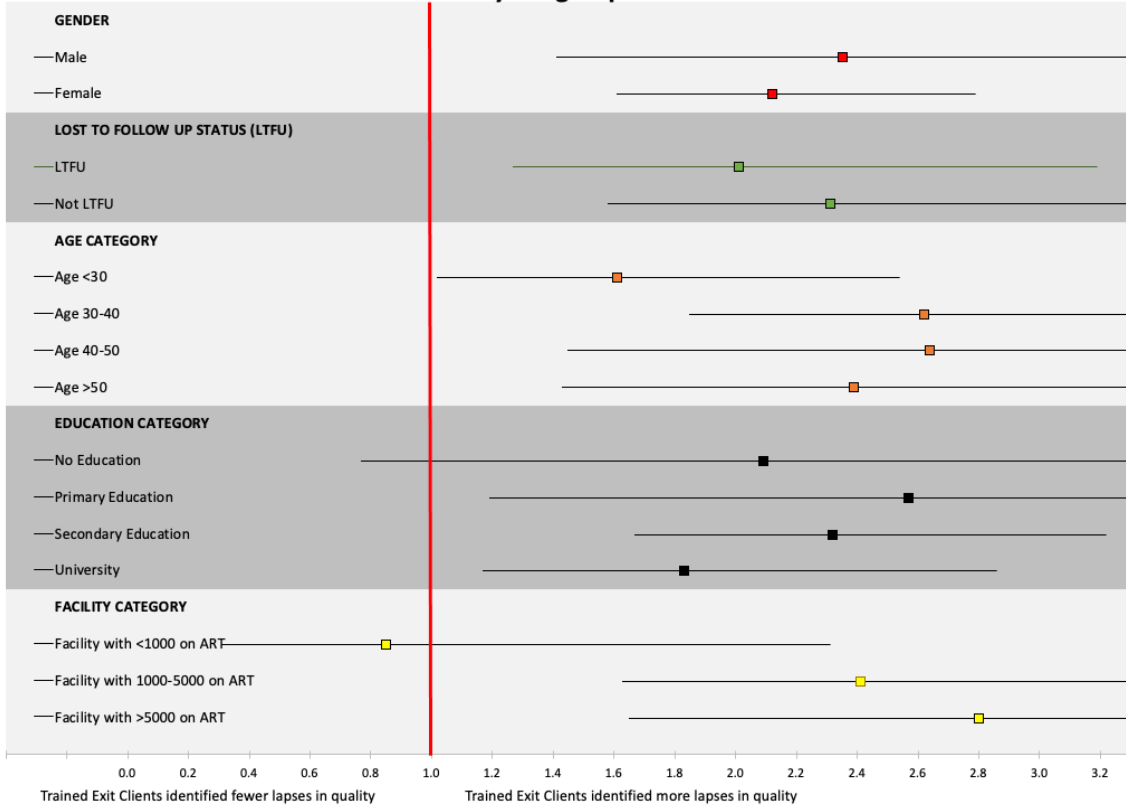

view only

**i) Impact of Training on Identifying Care Lapses  
Stratified by Subgroups- Lab results**

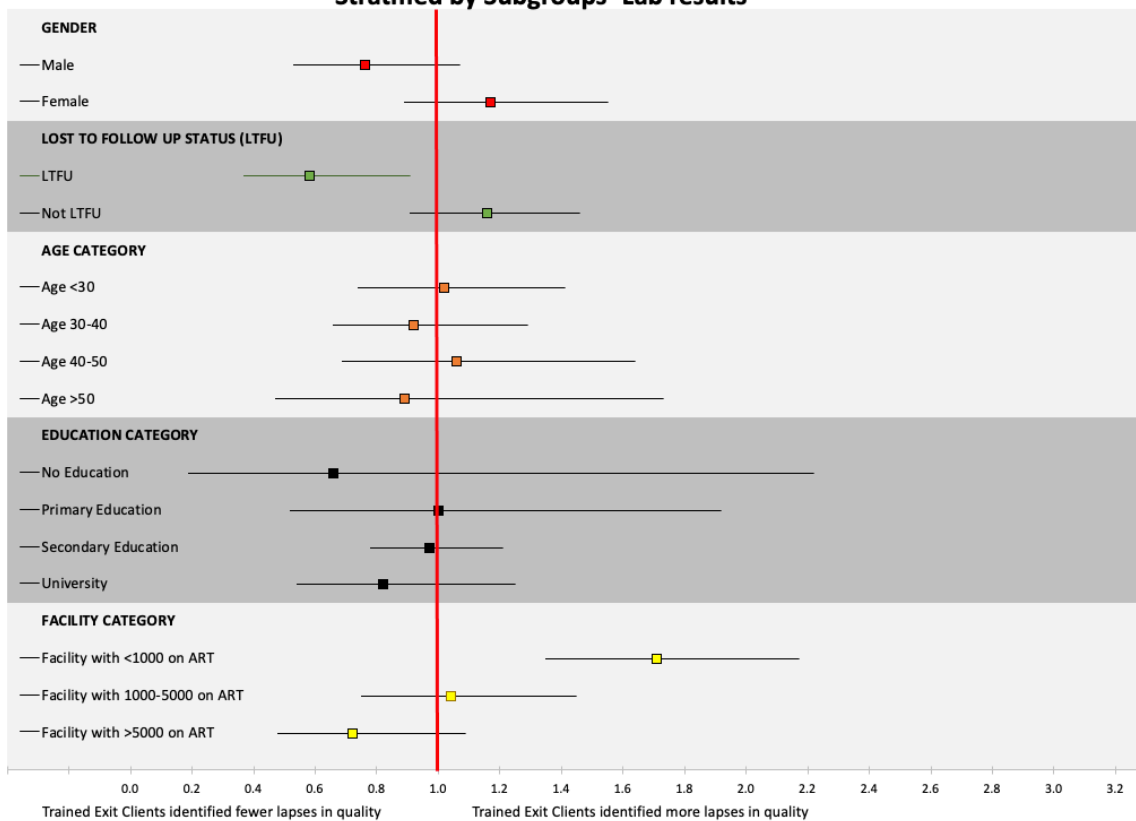

view only

1  
2  
3  
4  
5  
6  
7  
8  
9  
10  
11  
12  
13  
14  
15  
16  
17  
18  
19  
20  
21  
22  
23  
24  
25  
26  
27  
28  
29  
30  
31  
32  
33  
34  
35  
36  
37  
38  
39  
40  
41  
42  
43  
44  
45  
46  
47  
48  
49  
50  
51  
52  
53  
54  
55  
56  
57  
58  
59  
60

### j) Impact of Training on Identifying Care Lapses Stratified by Subgroups- Pick up meds

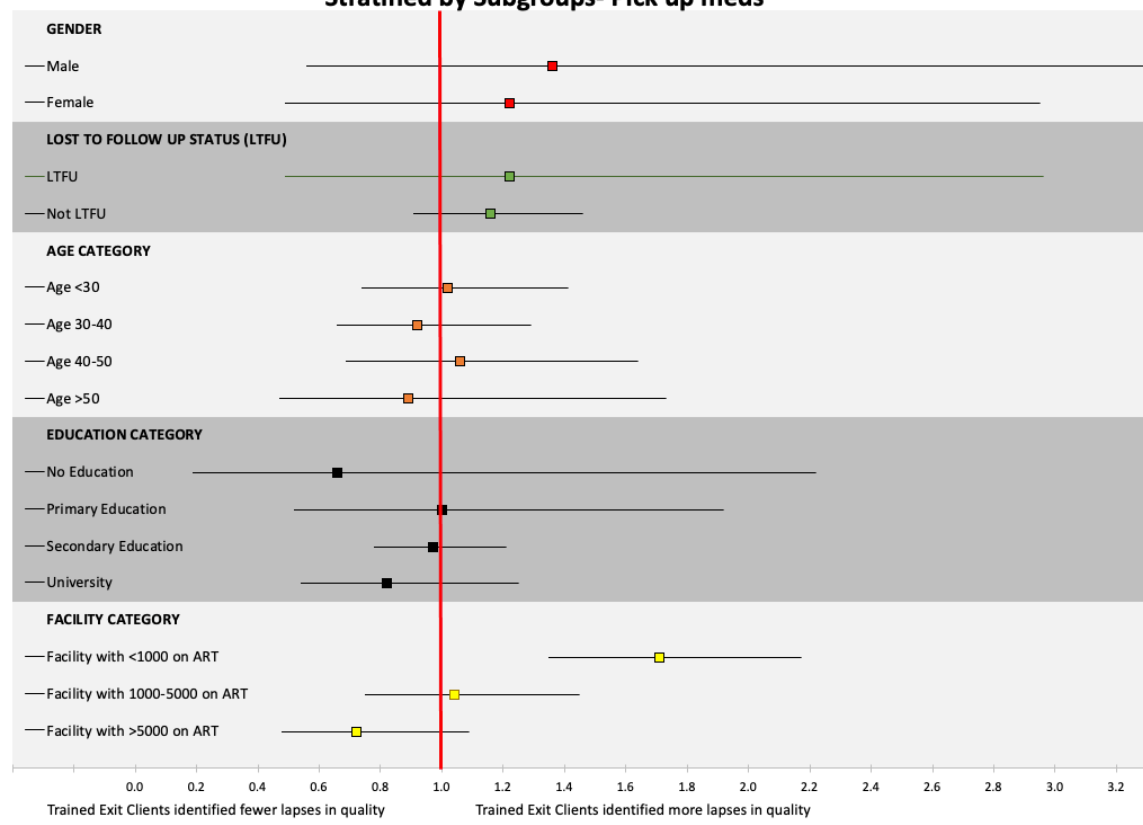

view only

Supplementary Figure 2

**Supplementary Figure 2.** Bubble plot showing Trained Exit Sum Score vs Untrained Exit Sum Score. Each bubble represents a single facilities performance. Each bubble’s size indicates the number of patients at each facility with larger bubbles corresponding to larger facilities. The horizontal position notes the Untrained Exit Sum Score for all questions against the facility, and the vertical position notes the Trained Exit sum score at the same facility.

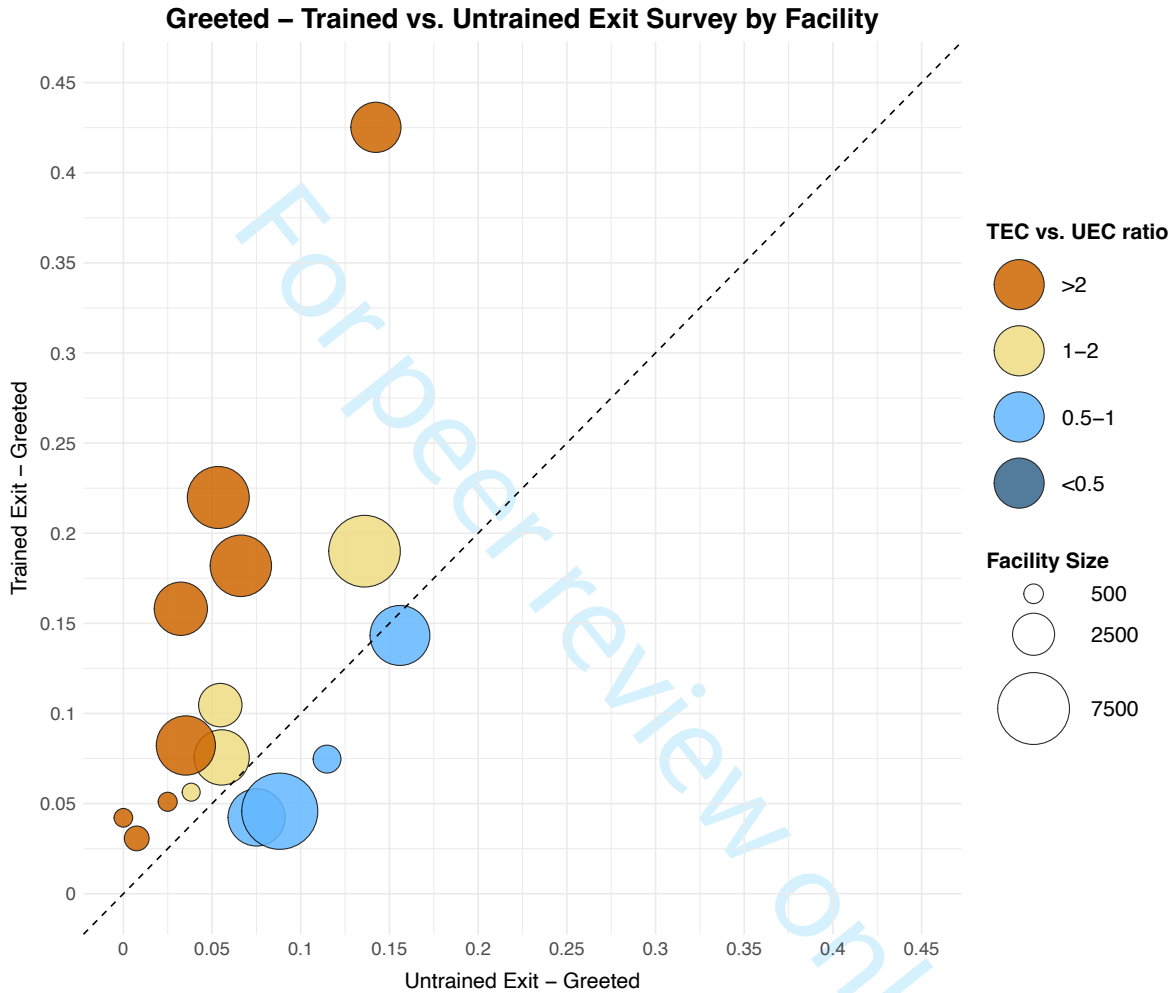

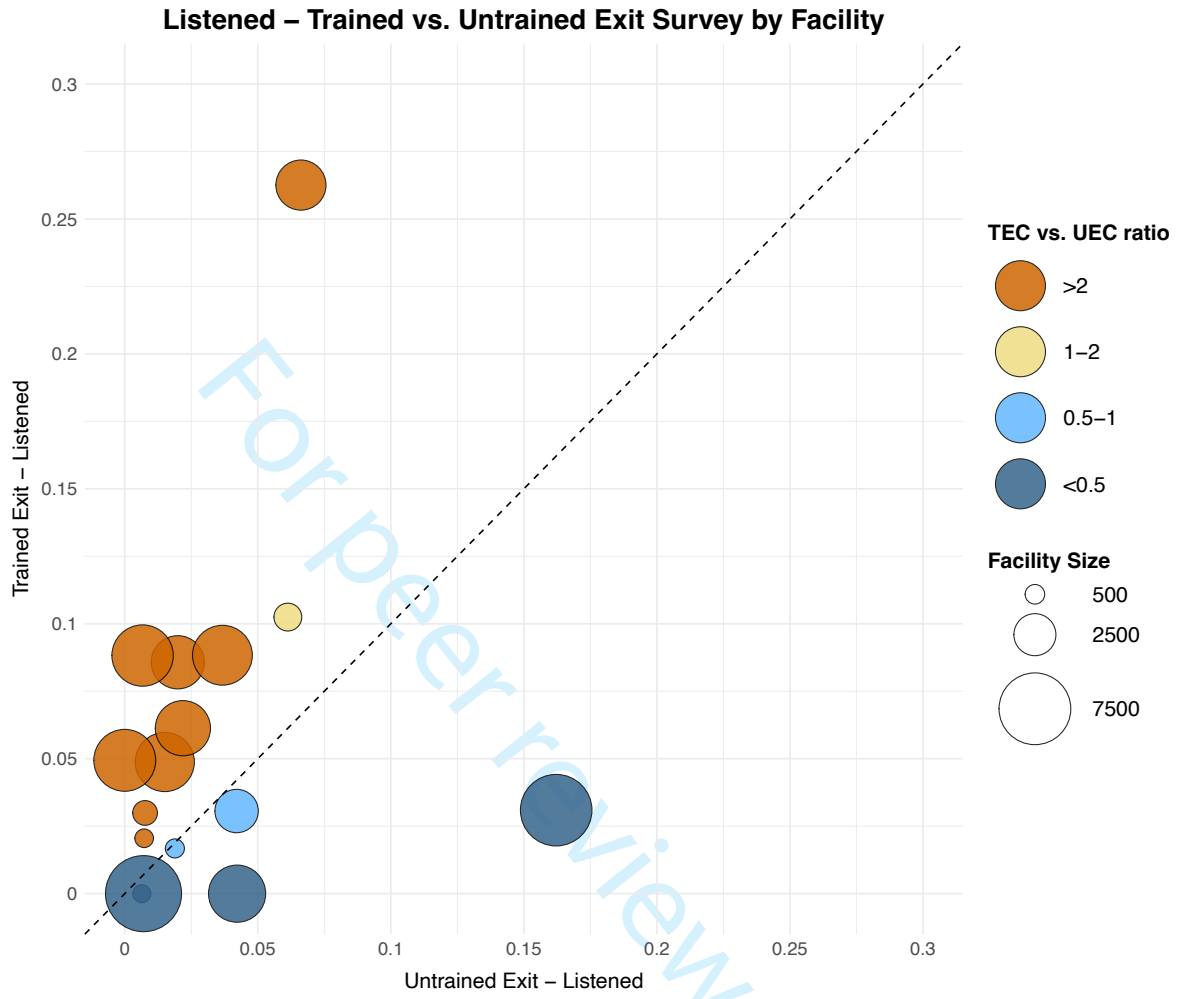

For peer review only

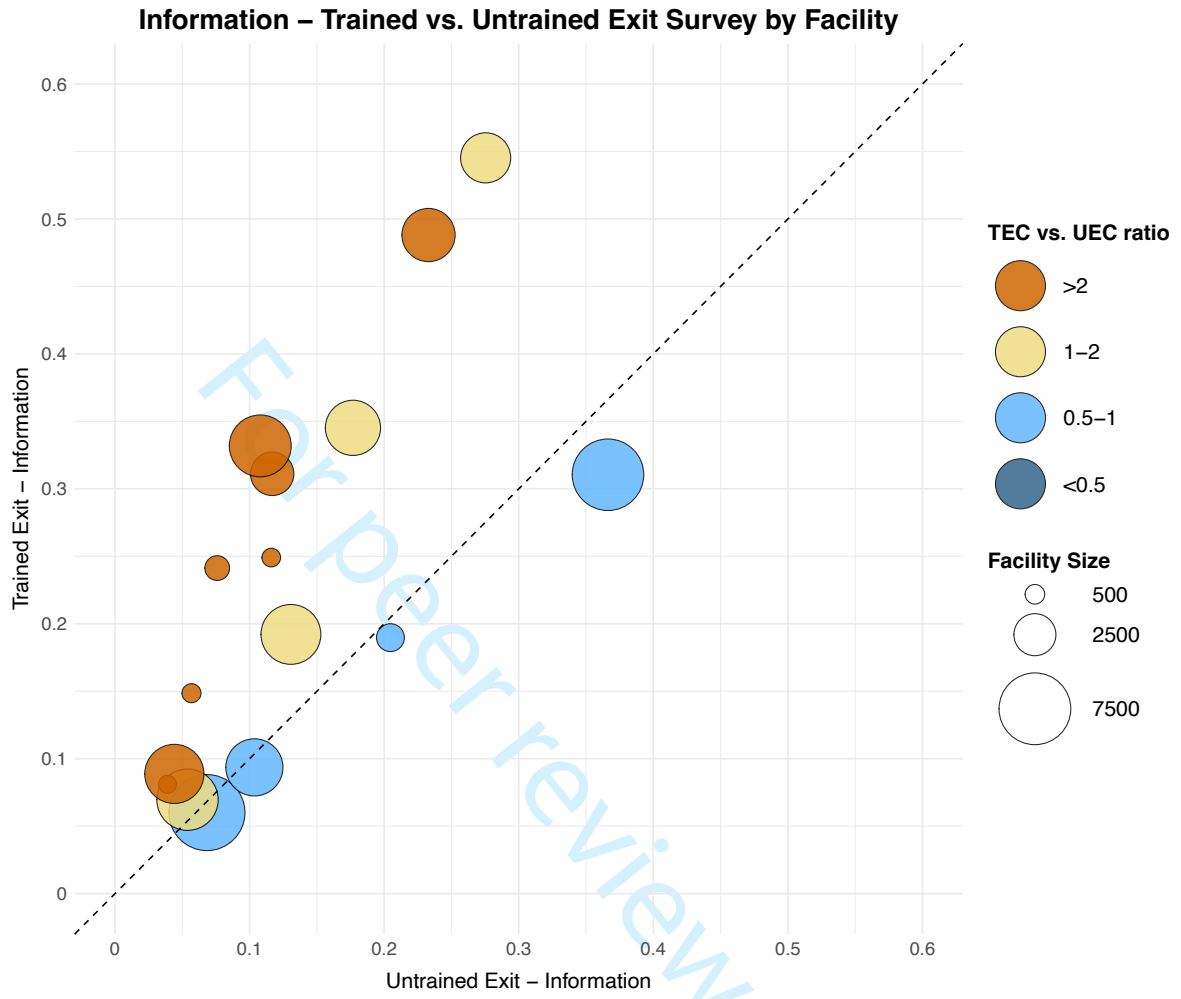

1  
2  
3  
4  
5  
6  
7  
8  
9  
10  
11  
12  
13  
14  
15  
16  
17  
18  
19  
20  
21  
22  
23  
24  
25  
26  
27  
28  
29  
30  
31  
32  
33  
34  
35  
36  
37  
38  
39  
40  
41  
42  
43  
44  
45  
46  
47  
48  
49  
50  
51  
52  
53  
54  
55  
56  
57  
58  
59  
60



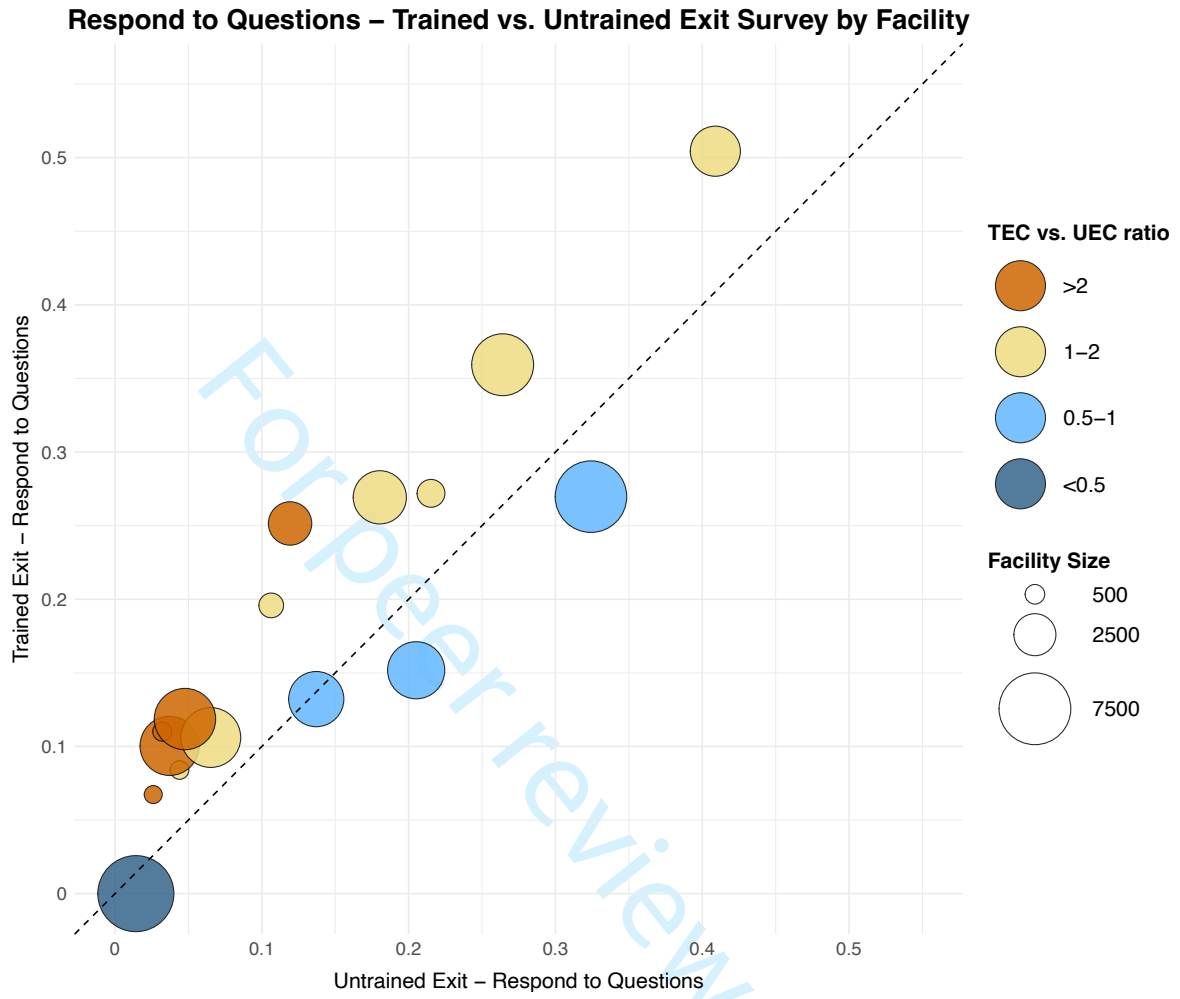

1  
2  
3  
4  
5  
6  
7  
8  
9  
10  
11  
12  
13  
14  
15  
16  
17  
18  
19  
20  
21  
22  
23  
24  
25  
26  
27  
28  
29  
30  
31  
32  
33  
34  
35  
36  
37  
38  
39  
40  
41  
42  
43  
44  
45  
46  
47  
48  
49  
50  
51  
52  
53  
54  
55  
56  
57  
58  
59  
60

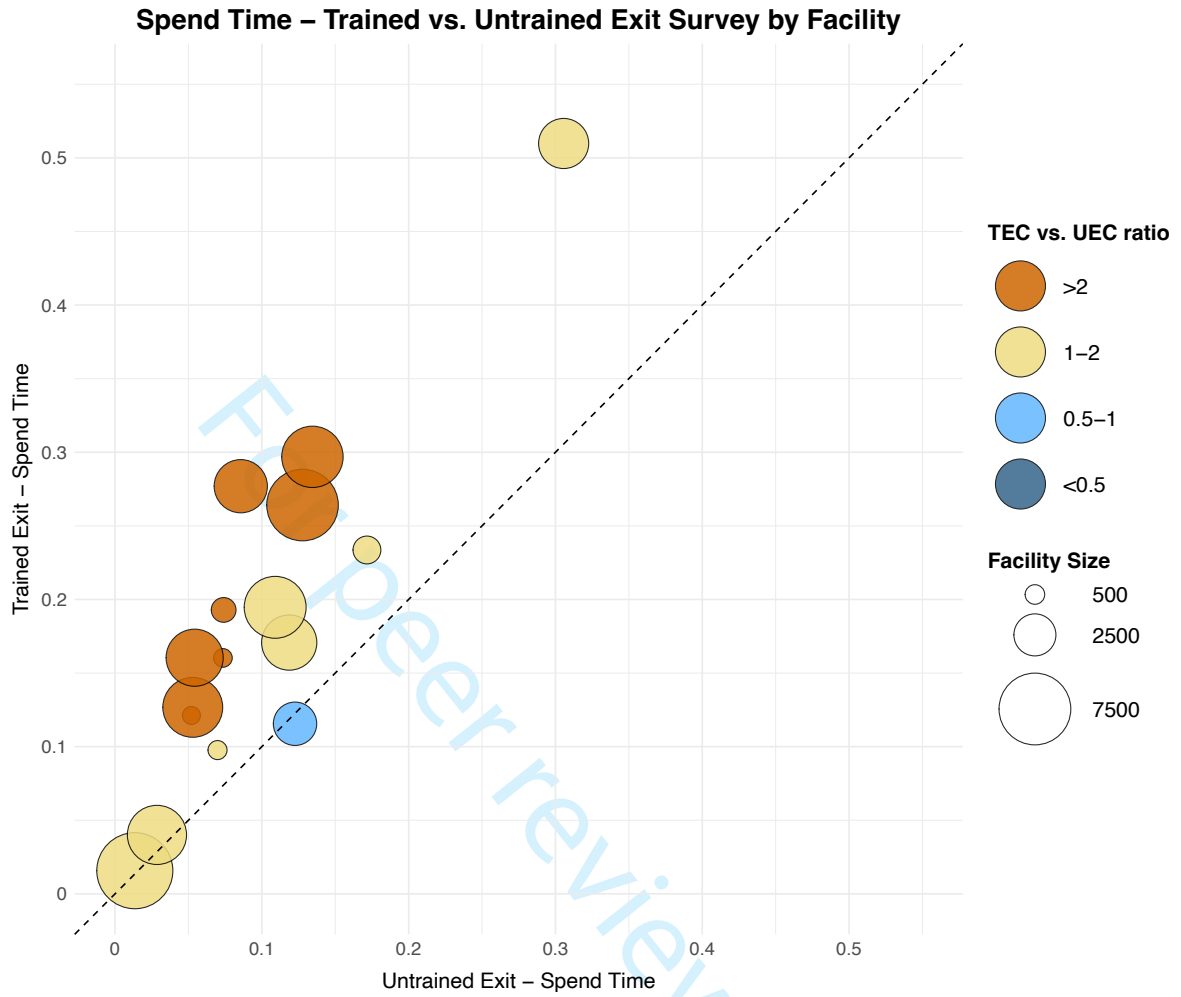

1  
2  
3  
4  
5  
6  
7  
8  
9  
10  
11  
12  
13  
14  
15  
16  
17  
18  
19  
20  
21  
22  
23  
24  
25  
26  
27  
28  
29  
30  
31  
32  
33  
34  
35  
36  
37  
38  
39  
40  
41  
42  
43  
44  
45  
46  
47  
48  
49  
50  
51  
52  
53  
54  
55  
56  
57  
58  
59  
60

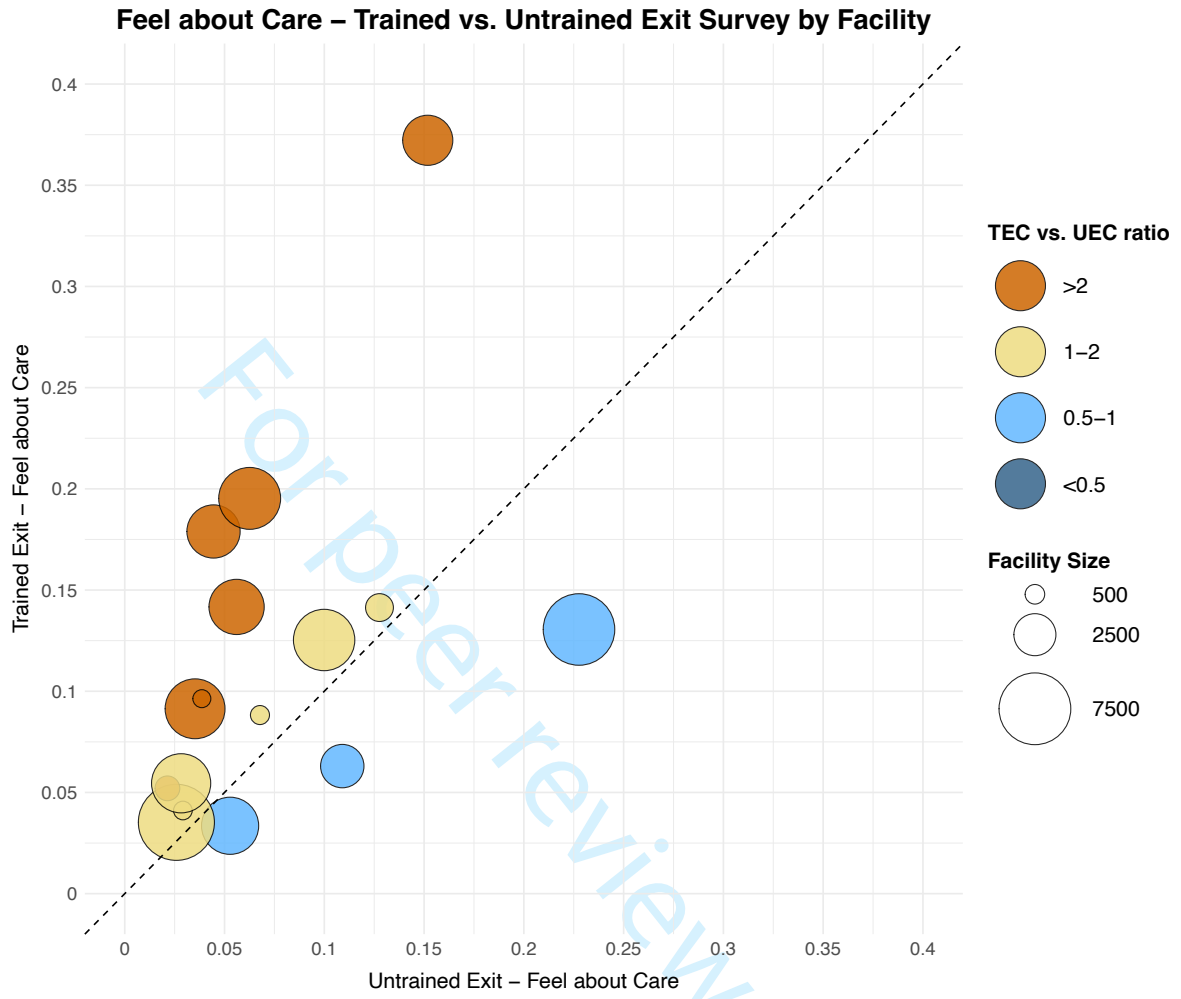

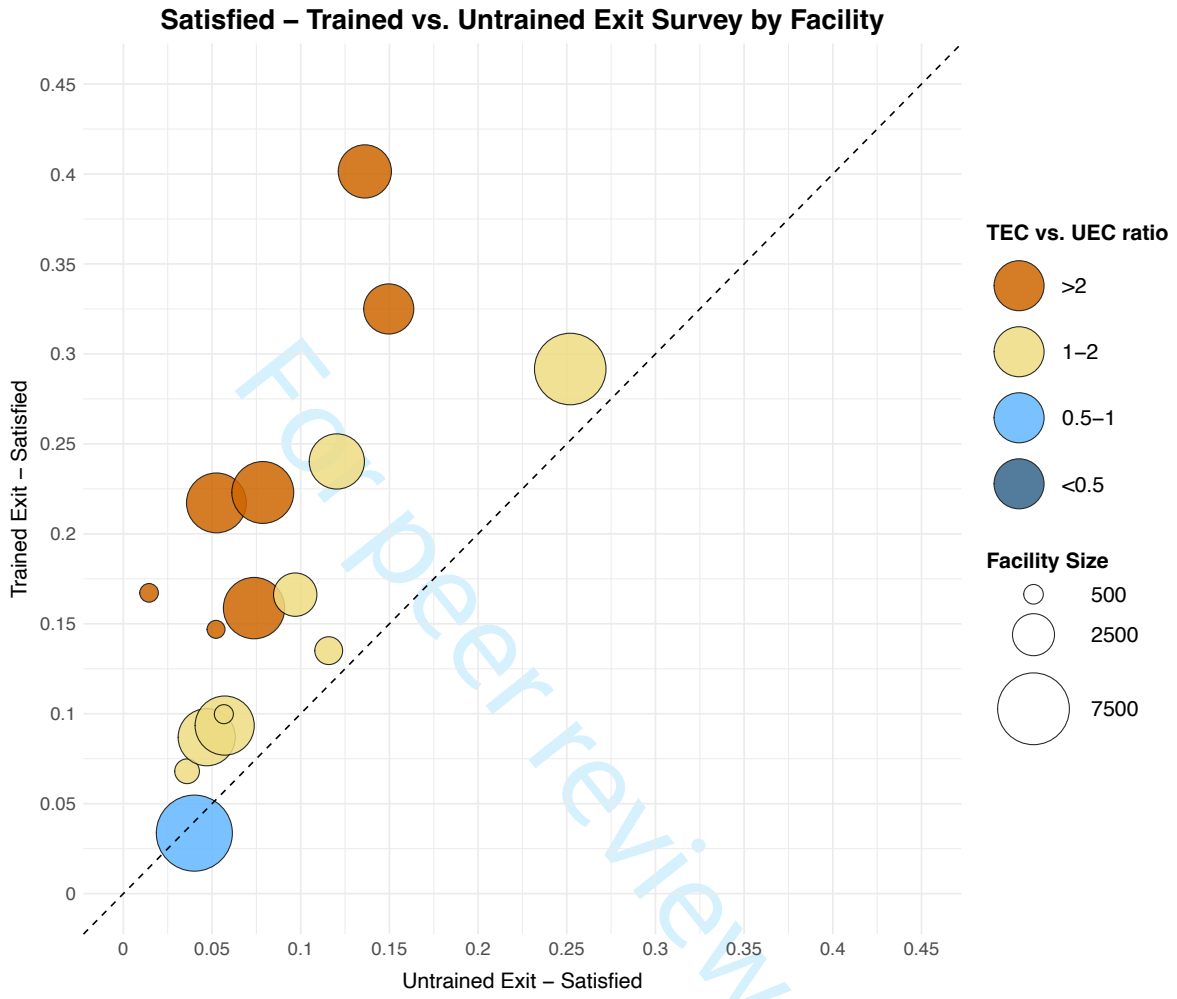

1  
2  
3  
4  
5  
6  
7  
8  
9  
10  
11  
12  
13  
14  
15  
16  
17  
18  
19  
20  
21  
22  
23  
24  
25  
26  
27  
28  
29  
30  
31  
32  
33  
34  
35  
36  
37  
38  
39  
40  
41  
42  
43  
44  
45  
46  
47  
48  
49  
50  
51  
52  
53  
54  
55  
56  
57  
58  
59  
60

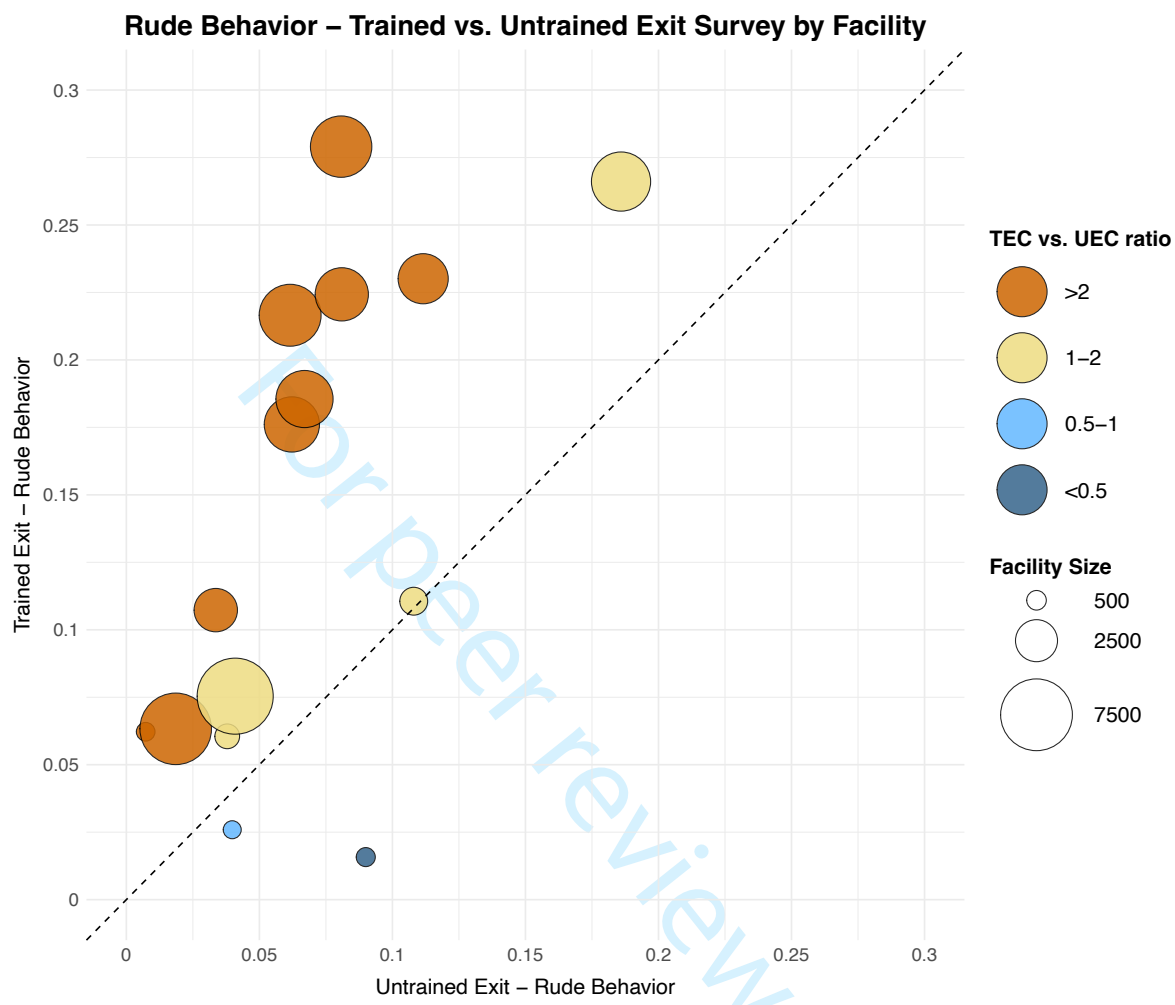

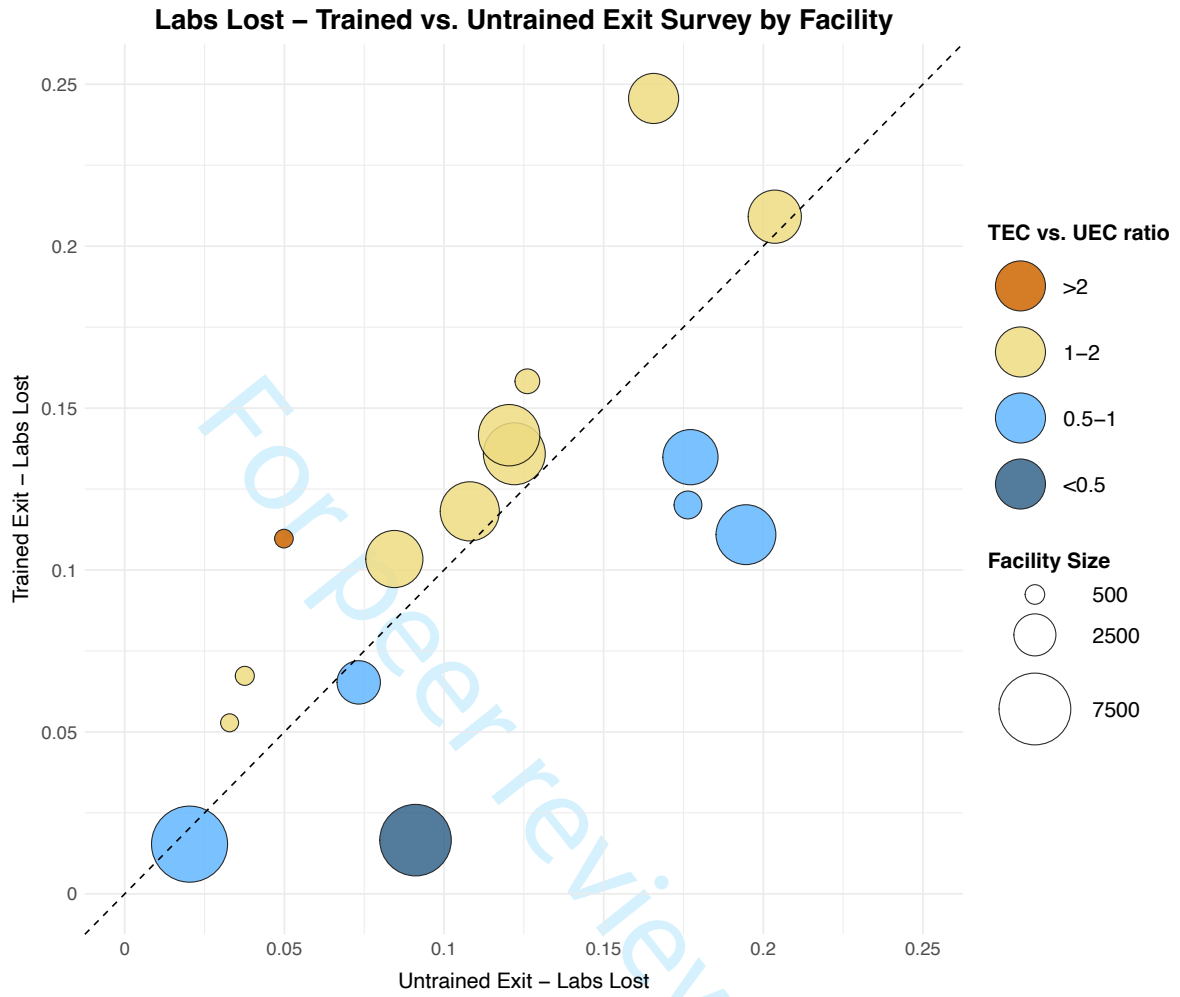

1  
2  
3  
4  
5  
6  
7  
8  
9  
10  
11  
12  
13  
14  
15  
16  
17  
18  
19  
20  
21  
22  
23  
24  
25  
26  
27  
28  
29  
30  
31  
32  
33  
34  
35  
36  
37  
38  
39  
40  
41  
42  
43  
44  
45  
46  
47  
48  
49  
50  
51  
52  
53  
54  
55  
56  
57  
58  
59  
60

## STROBE Statement—checklist of items that should be included in reports of observational studies

|                              | Item No | Recommendation                                                                                                                                                                                                                                                                                                                                                                                                                                                         | Page No |
|------------------------------|---------|------------------------------------------------------------------------------------------------------------------------------------------------------------------------------------------------------------------------------------------------------------------------------------------------------------------------------------------------------------------------------------------------------------------------------------------------------------------------|---------|
| <b>Title and abstract</b>    | 1       | (a) Indicate the study's design with a commonly used term in the title or the abstract                                                                                                                                                                                                                                                                                                                                                                                 | 1       |
|                              |         | (b) Provide in the abstract an informative and balanced summary of what was done and what was found                                                                                                                                                                                                                                                                                                                                                                    | 1       |
| <b>Introduction</b>          |         |                                                                                                                                                                                                                                                                                                                                                                                                                                                                        |         |
| Background/rationale         | 2       | Explain the scientific background and rationale for the investigation being reported                                                                                                                                                                                                                                                                                                                                                                                   | 3,4     |
| Objectives                   | 3       | State specific objectives, including any prespecified hypotheses                                                                                                                                                                                                                                                                                                                                                                                                       | 3       |
| <b>Methods</b>               |         |                                                                                                                                                                                                                                                                                                                                                                                                                                                                        |         |
| Study design                 | 4       | Present key elements of study design early in the paper                                                                                                                                                                                                                                                                                                                                                                                                                | 4,5     |
| Setting                      | 5       | Describe the setting, locations, and relevant dates, including periods of recruitment, exposure, follow-up, and data collection                                                                                                                                                                                                                                                                                                                                        | 5       |
| Participants                 | 6       | (a) <i>Cohort study</i> —Give the eligibility criteria, and the sources and methods of selection of participants. Describe methods of follow-up<br><i>Case-control study</i> —Give the eligibility criteria, and the sources and methods of case ascertainment and control selection. Give the rationale for the choice of cases and controls<br><i>Cross-sectional study</i> —Give the eligibility criteria, and the sources and methods of selection of participants | 5,6     |
|                              |         | (b) <i>Cohort study</i> —For matched studies, give matching criteria and number of exposed and unexposed<br><i>Case-control study</i> —For matched studies, give matching criteria and the number of controls per case                                                                                                                                                                                                                                                 | N/A     |
| Variables                    | 7       | Clearly define all outcomes, exposures, predictors, potential confounders, and effect modifiers. Give diagnostic criteria, if applicable                                                                                                                                                                                                                                                                                                                               | 5,7,8   |
| Data sources/<br>measurement | 8*      | For each variable of interest, give sources of data and details of methods of assessment (measurement). Describe comparability of assessment methods if there is more than one group                                                                                                                                                                                                                                                                                   | 5-7     |
| Bias                         | 9       | Describe any efforts to address potential sources of bias                                                                                                                                                                                                                                                                                                                                                                                                              | 4       |
| Study size                   | 10      | Explain how the study size was arrived at                                                                                                                                                                                                                                                                                                                                                                                                                              | 8       |
| Quantitative variables       | 11      | Explain how quantitative variables were handled in the analyses. If applicable, describe which groupings were chosen and why                                                                                                                                                                                                                                                                                                                                           | 7       |
| Statistical methods          | 12      | (a) Describe all statistical methods, including those used to control for confounding                                                                                                                                                                                                                                                                                                                                                                                  | 7       |
|                              |         | (b) Describe any methods used to examine subgroups and interactions                                                                                                                                                                                                                                                                                                                                                                                                    | 7       |
|                              |         | (c) Explain how missing data were addressed                                                                                                                                                                                                                                                                                                                                                                                                                            | N/A     |
|                              |         | (d) <i>Cohort study</i> —If applicable, explain how loss to follow-up was addressed<br><i>Case-control study</i> —If applicable, explain how matching of cases and controls was addressed<br><i>Cross-sectional study</i> —If applicable, describe analytical methods taking account of sampling strategy                                                                                                                                                              | N/A     |
|                              |         | (e) Describe any sensitivity analyses                                                                                                                                                                                                                                                                                                                                                                                                                                  | N/A     |

Continued on next page

| <b>Results</b>           |     |                                                                                                                                                                                                              |       |
|--------------------------|-----|--------------------------------------------------------------------------------------------------------------------------------------------------------------------------------------------------------------|-------|
| Participants             | 13* | (a) Report numbers of individuals at each stage of study—eg numbers potentially eligible, examined for eligibility, confirmed eligible, included in the study, completing follow-up, and analysed            | 9     |
|                          |     | (b) Give reasons for non-participation at each stage                                                                                                                                                         | 9     |
|                          |     | (c) Consider use of a flow diagram                                                                                                                                                                           | N/A   |
| Descriptive data         | 14* | (a) Give characteristics of study participants (eg demographic, clinical, social) and information on exposures and potential confounders                                                                     | 9, 10 |
|                          |     | (b) Indicate number of participants with missing data for each variable of interest                                                                                                                          | 9,10  |
|                          |     | (c) <i>Cohort study</i> —Summarise follow-up time (eg, average and total amount)                                                                                                                             | N/A   |
| Outcome data             | 15* | <i>Cohort study</i> —Report numbers of outcome events or summary measures over time                                                                                                                          | N/A   |
|                          |     | <i>Case-control study</i> —Report numbers in each exposure category, or summary measures of exposure                                                                                                         | N/A   |
|                          |     | <i>Cross-sectional study</i> —Report numbers of outcome events or summary measures                                                                                                                           | 10    |
| Main results             | 16  | (a) Give unadjusted estimates and, if applicable, confounder-adjusted estimates and their precision (eg, 95% confidence interval). Make clear which confounders were adjusted for and why they were included | 7,11  |
|                          |     | (b) Report category boundaries when continuous variables were categorized                                                                                                                                    |       |
|                          |     | (c) If relevant, consider translating estimates of relative risk into absolute risk for a meaningful time period                                                                                             |       |
| Other analyses           | 17  | Report other analyses done—eg analyses of subgroups and interactions, and sensitivity analyses                                                                                                               | 12,14 |
| <b>Discussion</b>        |     |                                                                                                                                                                                                              |       |
| Key results              | 18  | Summarise key results with reference to study objectives                                                                                                                                                     | 14,15 |
| Limitations              | 19  | Discuss limitations of the study, taking into account sources of potential bias or imprecision. Discuss both direction and magnitude of any potential bias                                                   | 18    |
| Interpretation           | 20  | Give a cautious overall interpretation of results considering objectives, limitations, multiplicity of analyses, results from similar studies, and other relevant evidence                                   | 19,20 |
| Generalisability         | 21  | Discuss the generalisability (external validity) of the study results                                                                                                                                        | 18    |
| <b>Other information</b> |     |                                                                                                                                                                                                              |       |
| Funding                  | 22  | Give the source of funding and the role of the funders for the present study and, if applicable, for the original study on which the present article is based                                                | 20    |

\*Give information separately for cases and controls in case-control studies and, if applicable, for exposed and unexposed groups in cohort and cross-sectional studies.

**Note:** An Explanation and Elaboration article discusses each checklist item and gives methodological background and published examples of transparent reporting. The STROBE checklist is best used in conjunction with this article (freely available on the Web sites of PLoS Medicine at <http://www.plosmedicine.org/>, Annals of Internal Medicine at <http://www.annals.org/>, and Epidemiology at <http://www.epidem.com/>). Information on the STROBE Initiative is available at [www.strobe-statement.org](http://www.strobe-statement.org).



# BMJ Open

## A Comparison of Patient Exit Interviews to Unannounced Standardised Patients for Assessing HIV Service Delivery in Zambia

|                               |                                                                                                                                                                                                                                                                                                                                                                                                                                                                                                                                                                                                                                                                                                                                                                                                                                                                                                                                                                                                                                                                                                                                                                                                                                                                                                                                                                                                                                                                                                                                                                                                                                                                                                                                                                                                                                                                                                                                                                                                                                                                                                                                                                                                        |
|-------------------------------|--------------------------------------------------------------------------------------------------------------------------------------------------------------------------------------------------------------------------------------------------------------------------------------------------------------------------------------------------------------------------------------------------------------------------------------------------------------------------------------------------------------------------------------------------------------------------------------------------------------------------------------------------------------------------------------------------------------------------------------------------------------------------------------------------------------------------------------------------------------------------------------------------------------------------------------------------------------------------------------------------------------------------------------------------------------------------------------------------------------------------------------------------------------------------------------------------------------------------------------------------------------------------------------------------------------------------------------------------------------------------------------------------------------------------------------------------------------------------------------------------------------------------------------------------------------------------------------------------------------------------------------------------------------------------------------------------------------------------------------------------------------------------------------------------------------------------------------------------------------------------------------------------------------------------------------------------------------------------------------------------------------------------------------------------------------------------------------------------------------------------------------------------------------------------------------------------------|
| Journal:                      | <i>BMJ Open</i>                                                                                                                                                                                                                                                                                                                                                                                                                                                                                                                                                                                                                                                                                                                                                                                                                                                                                                                                                                                                                                                                                                                                                                                                                                                                                                                                                                                                                                                                                                                                                                                                                                                                                                                                                                                                                                                                                                                                                                                                                                                                                                                                                                                        |
| Manuscript ID                 | bmjopen-2022-069086.R1                                                                                                                                                                                                                                                                                                                                                                                                                                                                                                                                                                                                                                                                                                                                                                                                                                                                                                                                                                                                                                                                                                                                                                                                                                                                                                                                                                                                                                                                                                                                                                                                                                                                                                                                                                                                                                                                                                                                                                                                                                                                                                                                                                                 |
| Article Type:                 | Original research                                                                                                                                                                                                                                                                                                                                                                                                                                                                                                                                                                                                                                                                                                                                                                                                                                                                                                                                                                                                                                                                                                                                                                                                                                                                                                                                                                                                                                                                                                                                                                                                                                                                                                                                                                                                                                                                                                                                                                                                                                                                                                                                                                                      |
| Date Submitted by the Author: | 13-Mar-2023                                                                                                                                                                                                                                                                                                                                                                                                                                                                                                                                                                                                                                                                                                                                                                                                                                                                                                                                                                                                                                                                                                                                                                                                                                                                                                                                                                                                                                                                                                                                                                                                                                                                                                                                                                                                                                                                                                                                                                                                                                                                                                                                                                                            |
| Complete List of Authors:     | <p>Sikombe, Kombatende; Center for Infectious Disease Research in Zambia, Implementation Science Unit; London School of Hygiene and Tropical Medicine Faculty of Public Health and Policy, Department of Public Health, Environments and Society</p> <p>Pry, Jake; Center for Infectious Disease Research in Zambia, Implementation Science Unit</p> <p>Mody, Aaloke; Washington University in St Louis School of Medicine, Internal Medicine</p> <p>Rice, Brian ; London School of Hygiene and Tropical Medicine Faculty of Public Health and Policy, Department of Public Health, Environments and Society</p> <p>Bukankala, Chama; Center for Infectious Disease Research in Zambia, Research</p> <p>Eshun-Wilson, Ingrid ; Washington University in St Louis School of Medicine, Internal Medicine</p> <p>Mutale, Jacob; Center for Infectious Disease Research in Zambia, Implementation Science Unit</p> <p>Simbeza, Sandra; Center for Infectious Disease Research in Zambia, Implementation Science Unit</p> <p>Beres, Laura K ; Johns Hopkins University Bloomberg School of Public Health, Department of International Health</p> <p>Mukamba, Njekwa; Center for Infectious Disease Research in Zambia, Social and Behavioural Science Research Group</p> <p>Mukumbwa-Mwenechanya, Mpande; Center for Infectious Disease Research in Zambia, Implementation Science Unit</p> <p>Mwamba, Daniel; Center for Infectious Disease Research in Zambia, Clinical Care Services</p> <p>Sharma, Anjali; Center for Infectious Disease Research in Zambia, Social and Behavioural Science Research Group</p> <p>Wringe, Alison; London School of Hygiene and Tropical Medicine Faculty of Epidemiology and Population Health</p> <p>Hargreaves, James; London School of Hygiene and Tropical Medicine Faculty of Public Health and Policy, Department of Public Health, Environments and Society</p> <p>Bolton-Moore, Carolyn; Center for Infectious Disease Research in Zambia, Clinical Care Services ; The University of Alabama at Birmingham Department of Medicine, Infectious Disease</p> <p>Holmes, Charles; Georgetown University Medical Center, Center for Innovation in Global Health</p> |

|                                 |                                                                                                                                                                                                                                           |
|---------------------------------|-------------------------------------------------------------------------------------------------------------------------------------------------------------------------------------------------------------------------------------------|
|                                 | Sikazwe, Izukanji; Center for Infectious Disease Research in Zambia, Implementation Science Unit<br>Geng, Elvin; Washington University in St Louis School of Medicine, Internal Medicine                                                  |
| <b>Primary Subject Heading</b>: | Health services research                                                                                                                                                                                                                  |
| Secondary Subject Heading:      | Epidemiology, Global health, Health services research, HIV/AIDS, Patient-centred medicine                                                                                                                                                 |
| Keywords:                       | Public health < INFECTIOUS DISEASES, Organisation of health services < HEALTH SERVICES ADMINISTRATION & MANAGEMENT, Quality in health care < HEALTH SERVICES ADMINISTRATION & MANAGEMENT, HIV & AIDS < INFECTIOUS DISEASES, PUBLIC HEALTH |
|                                 |                                                                                                                                                                                                                                           |

SCHOLARONE™  
Manuscripts



I, the Submitting Author has the right to grant and does grant on behalf of all authors of the Work (as defined in the below author licence), an exclusive licence and/or a non-exclusive licence for contributions from authors who are: i) UK Crown employees; ii) where BMJ has agreed a CC-BY licence shall apply, and/or iii) in accordance with the terms applicable for US Federal Government officers or employees acting as part of their official duties; on a worldwide, perpetual, irrevocable, royalty-free basis to BMJ Publishing Group Ltd ("BMJ") its licensees and where the relevant Journal is co-owned by BMJ to the co-owners of the Journal, to publish the Work in this journal and any other BMJ products and to exploit all rights, as set out in our [licence](#).

The Submitting Author accepts and understands that any supply made under these terms is made by BMJ to the Submitting Author unless you are acting as an employee on behalf of your employer or a postgraduate student of an affiliated institution which is paying any applicable article publishing charge ("APC") for Open Access articles. Where the Submitting Author wishes to make the Work available on an Open Access basis (and intends to pay the relevant APC), the terms of reuse of such Open Access shall be governed by a Creative Commons licence – details of these licences and which [Creative Commons](#) licence will apply to this Work are set out in our licence referred to above.

Other than as permitted in any relevant BMJ Author's Self Archiving Policies, I confirm this Work has not been accepted for publication elsewhere, is not being considered for publication elsewhere and does not duplicate material already published. I confirm all authors consent to publication of this Work and authorise the granting of this licence.

## A Comparison of Patient Exit Interviews to Unannounced Standardised Patients for Assessing HIV Service Delivery in Zambia

Kombatende Sikombe<sup>1,2</sup>, Jake M Pry<sup>1,3</sup>, Aaloke Mody<sup>4</sup>, Brian Rice, Chama Bukankala<sup>1</sup>, Ingrid Eshun-Wilson<sup>4</sup>, Jacob Mutale<sup>1</sup>, Sandra Simbeza<sup>1</sup>, Laura K Beres<sup>5</sup>, Njekwa Mukamba<sup>1</sup>, Mpande Mukumbwa-Mwenechanya<sup>1</sup>, Daniel Mwamba<sup>1</sup>, Anjali Sharma<sup>1</sup>, Alison Wringe<sup>6</sup>, James Hargreaves<sup>1</sup>, Carolyn Bolton Moore<sup>1,7</sup>, Charles B Holmes<sup>8</sup>, Izukanji Sikazwe<sup>1</sup>, Elvin Geng<sup>4</sup>

<sup>1</sup>Centre for Infectious Disease Research in Zambia, Lusaka, Zambia, <sup>2</sup>Faculty of Public Health and Policy, London School of Hygiene & Tropical Medicine, London, UK, <sup>3</sup>Department of Public Health Sciences, University of California, Davis, CA, USA, <sup>4</sup>Division of Infectious Diseases, Washington University in St Louis, St. Louis, MO, USA, <sup>5</sup>Department of International Health, Johns Hopkins Bloomberg School of Public Health, Baltimore, MD, USA, <sup>6</sup>Faculty of Epidemiology and Population Health, London School of Hygiene and Tropical Medicine, London, UK, <sup>7</sup>Department of Medicine, School of Medicine, University of Alabama at Birmingham, Birmingham, AL, USA, <sup>8</sup>Center for Innovation in Global Health, Georgetown University, Washington, DC, USA.

Corresponding Author: Kombatende Sikombe

Affiliations: Centre for Infectious Disease Research in Zambia, Lusaka, Zambia, Faculty of Public Health and Policy, London School of Hygiene & Tropical Medicine, London, UK

Email Address: [kombatende.sikombe@cidrz.org](mailto:kombatende.sikombe@cidrz.org) [kombatende.sikombe@lshtm.ac.uk](mailto:kombatende.sikombe@lshtm.ac.uk)

## ABSTRACT

**Objectives:** To compare the use of an unannounced standardised patient approach (e.g., mystery clients) to typical exit interviews for assessing patient experiences in HIV care (e.g., unfriendly interactions with providers, long-waiting times). We hypothesize standardized patients would report more negative experiences than typical exit interviews affected by social desirability bias.

**Setting:** Cross-sectional surveys in 16 government-operated HIV primary care clinics in Lusaka, Zambia providing antiretroviral-therapy (ART).

**Participants:** 3526 participants aged  $\geq 18$  years receiving ART participated in the exit surveys between August 2019 and November 2021.

**Intervention:** Systematic sample (every  $k^{\text{th}}$  file) of patients in clinic waiting area willing to be trained received pre-visit training and post-visit interviews. Providers were unaware of trained patients.

**Outcome measures:** We compared patient experience among patients that received a brief training prior to their care visit (explaining each patient experience construct in the exit survey, being anonymous, without manipulating behaviour) with those who did not undergo training on the survey prior to their visit.

**Results:** Among 3526 participants who participated in exit surveys, 2415 were untrained (56% female, median age 40 (IQR:32-47)) and 1111 were trained (50% female, median age 37 (IQR:31-45)). Compared to untrained, trained patients were more likely to report a negative care experience overall (adjusted Prevalence Ratio aPR for aggregate sum score: 1.64 [95% CI:1.39-1.94]), with a greater proportion reporting feeling unwelcomed by providers ([aPR]: 1.71 [95% CI:1.20-2.44]) and witnessing providers behaving rude (aPR: 2.28 [95% CI:1.63-3.19]).

**Conclusion:** Trained patients were more likely to identify sub-optimal care. They may have understood the items solicited better or felt empowered to be more critical., We trained existing patients, unlike studies that use “standardised patients” drawn from outside the patient population. This low-cost strategy could improve patient-centred service delivery elsewhere.

**Trial registration:** Assessment was nested within a parent study. [www.pactr.org](http://www.pactr.org) registered the parent study (PACTR202101847907585).

## STRENGTHS AND LIMITATIONS OF THIS STUDY

- We demonstrate feasibility of a standardised patient (SP) approach designed to assess chronic care in which real, not simulated, patients are trained before their upcoming encounters.
- Traditional SP techniques require a trained simulated patient to visit multiple clinics, a strategy more appropriate for episodic care rather than chronic care.
- Modified SP approaches can address these rigorous and pragmatic challenges of integrating patient experience into chronic routine public health- a crucial indicator of quality for governments and funders.
- We trained patients to evaluate quality of care (e.g., waiting times, rude providers), and compared their responses to traditional untrained exit surveys in 16 facilities in Zambia.
- How to train remains a challenge as we did not recruit participants who were not able to read and write, perceived to have bad recall ability and potentially unable to comprehend.

## BACKGROUND

Because of improved testing, linkage, and treatment to meet the global 95-95-95 treatment targets (95% of HIV-positive patients know their status, 95% are on treatment, and 95% have suppressed viral loads) [1], retention in care have become a major obstacle to improving Human Immunodeficiency Virus (HIV) treatment outcomes, and health systems in low-income settings like Zambia, have sought to shift their public health response by designing and delivering high quality and patient-centred HIV care [2–7]. Efforts to improve service quality and patient experience require systematic measurement of the patient experience to guide facility responses as poor patient experience has been shown to lead to disengagement from care [8–12]. Health policymakers and donors, such as the President's Emergency Plan for AIDS Relief (PEPFAR), have invested in clinical metrics to assess care quality in Zambia and the wider region, but to a lesser extent in non-clinical metrics like patient experience [13]. These metrics can be critical for guiding efforts to improve retention in care by ensuring an informed response to improving quality of care and patient centredness.

Accurate and pragmatic measurement of the patient experience poses a range of challenges. Patient experience exit surveys are prone to social desirability bias because of power dynamics in health care. Empirical studies of satisfaction, for example, are widely believed to over-estimate patient satisfaction [14]. This may be particularly true where provider-patient relationships are traditional and hierarchical. Delaying surveys for some time after the encounter is theorised to ameliorate social desirability bias, but in turn may exacerbate bias due to simple inability to remember — thus creating recall bias [7,15]. Other methods such as direct clinical observations of care pose practical difficulties [14,16]. For example, direct observations may be intrusive and

1  
2  
3 160 therefore may not reflect everyday functionality of a health facility. Care provided under direct  
4  
5  
6 161 observations may be of higher quality as behaviour may be influenced by observation, a  
7  
8 162 phenomenon often known as the “Hawthorne effect” [14,16].  
9  
10

11 163 Standardised patients (SP), also known as “mystery clients” or “simulated patients” have  
12  
13  
14 164 largely been used to assess quality of care in developed countries, as well as in assessing customer  
15  
16 165 service in the retail industry[17]. SP can be resource-intensive and require training, but reduce  
17  
18 166 potential for recall bias, social desirability, bias, and Hawthorne effects, providing an opportunity  
19  
20  
21 167 for optimal assessment of patient satisfaction among people receiving HIV care [7,15,18]. They  
22  
23 168 have largely been used for episodic care where a highly skilled and well-trained person poses as a  
24  
25 169 client by making one visit to multiple facilities. This approach holds promise for assessing the  
26  
27 170 patient experience in HIV care but poses pragmatic challenges when assessing the quality of chronic  
28  
29  
30 171 care in which a patient makes multiple visits and may compromise efficiency at, already  
31  
32 172 overburdened, facilities [19–24]. In this study, we report on the development and evaluation of a  
33  
34 173 modified SP approach in which we trained real patients (trained exit clients - TEC) to report on  
35  
36  
37 174 certain characteristics of encounters, and rate key components of care such as waiting times,  
38  
39 175 communication, respectfulness of providers, and privacy.  
40  
41

## 42 43 176 **METHODS**

### 44 45 177 **Study design & setting**

46  
47  
48 178 This study seeks to compare two different methods for assessing patient experience: standard  
49  
50 179 exit survey and those reported by patients who had a brief training on the items before the clinical  
51  
52 180 encounter and to whom the clinic was blinded. The assessment was nested within a parent study:  
53  
54  
55 181 the Leveraging Person-Centred Public Health (PCPH) to improve HIV outcomes in Zambia study  
56  
57  
58  
59  
60



1  
2  
3 182 ([www.pactr.org](http://www.pactr.org) PACTR202101847907585), a Stepped Wedge Cluster Randomised Trial that  
4  
5  
6 183 occurred between August 2019 and November 2021. The aim of the overall PCPH study was to  
7  
8 184 assess the impact of introducing health care workers (HCW) to a patient-centred care (PCC)  
9  
10 185 curriculum and mentoring them on PCC principles to improve retention and viral suppression in  
11  
12 186 HIV care. In this nested sub-study, we compared cross sectional surveys of patient experience using  
13  
14  
15 187 two different survey methods: adapted standardised approach (Trained Exit Clients) vs traditional  
16  
17 188 exit surveys.  
18

## 19 189 20 21 190 **Population**

22  
23  
24 191 The sub-study reported here included 16 health facilities in Lusaka, Zambia, operated by the  
25  
26 192 Ministry of Health (MOH) and receiving technical assistance from the Centre for Infectious  
27  
28 193 Diseases Research in Zambia (CIDRZ) - a Zambian non-governmental organisation (NGO) as well  
29  
30  
31 194 as a part of the larger parent study. We surveyed adults aged 18 years and over who were accessing  
32  
33 195 antiretroviral therapy (ART) at study facilities. Exit survey patients were selected in a systematic  
34  
35 196 sample (every  $k^{\text{th}}$  file varied by facility size) at the time of exit from the clinic. Trained patients were  
36  
37  
38 197 recruited in the waiting room for their visit, underwent a brief training, and then answered survey  
39  
40 198 questions on exit from their encounter. Participants attending an HIV care visit on the day, able to  
41  
42 199 recall events and comprehend study participant recruitment details (as assessed using the  
43  
44  
45 200 comprehension assessment tool) and able to read and write (assessed using literacy tool) were  
46  
47 201 eligible for inclusion.  
48

## 49 202 50 51 203 **Procedures and Measurements**

### 52 53 54 204 Survey Instrument

1  
2  
3 205 For both survey methods, we developed a patient experience instrument based on a previously  
4  
5  
6 206 validated tool developed and used in Kenya: The Wachira Physician-Patient Communication  
7  
8 207 Behaviours Scale [25–27]. This survey assessed elements of patient experience including how they  
9  
10 208 were greeted, communicated to, and overall experience. We included additional questions to capture  
11  
12 209 for example, patient reports of witnessing rude behaviour, receiving appropriate medications and  
13  
14  
15 210 availability of lab results. Prior to use in this study, we performed cognitive interviews among  
16  
17 211 twenty participants to assess consistency in understanding questions in English, Bemba and Nyanja.  
18  
19 212 Surveys were forward and back translated to ensure consistency across the three languages. The  
20  
21  
22 213 survey tools for trained and untrained clients were identical. Research assistants were trained by the  
23  
24 214 first author in recruitment, training and administering of the TEC and UEC survey in all 16 facilities.  
25  
26 215 The provincial and district health management teams were informed about the unannounced TEC  
27  
28  
29 216 survey as well as the UEC survey. The study team sensitised all facility staff at the start of the study,  
30  
31 217 but HCWs were not aware of who specific TECs were.  
32

### 33 218 Procedures for Trained and Untrained Exit Clients

34  
35 219  
36  
37  
38 220 Efforts to “standardise” assessment of the quality and nature of care in HIV care differs from  
39  
40 221 most previously standardised patient or mystery client work in that HIV care is longitudinal as  
41  
42 222 opposed to episodic or acute care. Under these circumstances, the more conventional standardised  
43  
44  
45 223 patient where a single trained actor can present to multiple different care facilities as a simulated  
46  
47 224 patient with a defined set of symptoms or complaints to assess a single episode of care is not feasible.  
48  
49 225 For example, a patient would have to either register as a new patient or have a false “file” introduced  
50  
51  
52 226 into the paper and electronic medical records — which was deemed infeasible and undesirable.  
53  
54  
55  
56  
57  
58  
59  
60

1  
2  
3 227 Instead of simulated patients, we recruited existing patients already receiving care at a particular  
4  
5 228 facility and then subsequently trained them on the concepts of quality of care according to the MOH  
6  
7 manual on Quality Improvement for HCWs in Zambia. To avoid disclosing their trained status,  
8 229  
9 patients were recruited on the day of their visit prior to them entering the triage area (i.e., the first  
10 230  
11 point of contact with HCWs). Those who consented underwent a single one-on-one training session  
12 231  
13 for 40 to 60 minutes where they were sensitised to the study instrument (which was the same for  
14 232  
15 both TEC and untrained exit clients (UEC)), the MOH care standards, and strategies on being natural  
16 233  
17 yet observant during their clinic visit for that day according to the standard SP approach. These  
18 234  
19 procedures were meant to ensure patients had a clear and uniform understanding on what they should  
20 235  
21 expect during a high-quality patient visit and were attentive to these critical aspects relative to these  
22 236  
23 standards. Immediately after this training, the TEC presented themselves to their facility and  
24 237  
25 completed their visit as they normally would. After their clinic encounter, participants then  
26 238  
27 completed the exit survey in a private area.  
28  
29  
30  
31 239

32  
33 240 For the untrained exit surveys, we took a systematic (every  $k^{th}$ , varied by facility size) sample  
34  
35 241 among the patients leaving the facility after attending the clinic on the survey day. Patients were  
36  
37 approached by study staff after the visit using a recruitment script to determine their eligibility and  
38 242  
39 were administered the survey after granting consent in a private area.  
40 243  
41

42 244 For both trained and untrained clients, all interviews and surveys were conducted in either  
43  
44 English, Bemba or Nyanja depending on the participant's preference. Given the extra time  
45 245  
46 commitments required for the training, TEC participants were given K100 (~\$5) for the time spent  
47 246  
48 during training as well as a light snack during the survey administration.  
49 247  
50

## 51 248 52 53 54 249 **Statistical Analysis**

1  
2  
3 250 To assess the association between training and response for each question, we conducted  
4  
5  
6 251 unadjusted and adjusted Poisson regression for each question separately [28]. We then assessed the  
7  
8 252 overall association between training and total sum score. We used descriptive statistics to  
9  
10 253 characterise patient characteristics and report survey responses. In these analyses, most of the survey  
11  
12 254 responses were reverse coded to identify when respondents reported a negative experience. Results  
13  
14  
15 255 for individual questions (binary response) represent prevalence ratios for reporting a lapse in care.  
16  
17 256 To assess the sum score (count data) we used Poisson regression, estimating the rate ratio for  
18  
19 257 reporting lapses in care. All models were adjusted, given potential differences in survey participants  
20  
21  
22 258 related to different recruitment strategies using mixed-effects regression, adjusted for age, sex,  
23  
24 259 education, care status at the time (i.e., continuously retained in care versus returning to care after  
25  
26 260 disengagement/ lost to follow up [LTFU]), secular time (using cubic splines), allowing random  
27  
28  
29 261 effects at the facility level. We present these results for the overall population as well as stratified  
30  
31 262 by different pre-defined patient subgroups. Lastly, we used bubble plots to compare summary  
32  
33 263 assessments of the patient experience at the facility-level using TECs versus UECs. All analyses  
34  
35 264 were performed using STATA 14MP (StataCorp, College Station, TX, USA). This sub-study  
36  
37  
38 265 represents a secondary analysis and no formal power calculations were performed for this outcome.  
39  
40 266

### 41 42 267 **Statement of Ethics Approval**

43 268  
44 269 Ethics approval to conduct this research was granted by the Zambian Ministry of Health,  
45  
46  
47 270 National Health Research Authority, and the institutional review boards of the University of Zambia  
48  
49 271 (008-03-19), the University of Alabama at Birmingham (300003282) and the London School of  
50  
51  
52 272 Hygiene and Tropical Medicine (21384).  
53  
54 273

## Patient and Public Involvement

Survey questions were developed through a cognitive process with recipients of care. Study implementation guidance was conducted as part of routine CIDRZ partnership with the Zambian MOH through a Human Centered Design workshop. CIDRZ engages with implementing partners and affected communities in health facilities, including people living with HIV often represented by neighbourhood health representatives. Although patients were not directly involved in the design of the parent study intervention or the analysis presented here, all study activities were guided by a Scientific Advisory Board with representation from the MOH and a representative of recipients of HIV care. Dissemination of study results is ongoing.

## RESULTS

### Characteristics of health facilities and patients

We approached 4375 clients (2955 in the untrained and 1420 in the trained), and 3526 participated, of which 2415 (55.2%) completed experience surveys as untrained exit clients (UEC) (56% female, median age was 40 years (interquartile range [IQR]:32-47 years)) and 1111 (32%) completed experience surveys as trained exit clients (TEC) (50% female with a median age 37 years (IQR:31-45 years). Reasons for non-participation included unavailability at the time due to other commitments. Sixteen percent (16%) of UECs and 40% of TECs who had been lost to care and were returning to care on the day of the survey. Education levels differed between UEC and TEC with 47% and 58% reporting completion of secondary level of education, respectively (Table 1). UEC and TEC were similar for HIV enrolment WHO stage with the largest proportion enrolling at WHO stage 1 and similar in terms of marital status.

**Table 1. Socio-demographic characteristics of untrained exit and trained exit clients**

| <b>Characteristics</b>             | <b>Level</b>              | <b>Untrained<br/>Exit Clients<br/>n=2415 (68%)</b> | <b>Trained<br/>Exit Clients<br/>n=1111<br/>(32%)</b> |
|------------------------------------|---------------------------|----------------------------------------------------|------------------------------------------------------|
| <b>Sex, n (%)</b>                  |                           |                                                    |                                                      |
|                                    | <b>Female</b>             | 1355 (56)                                          | 553 (50)                                             |
|                                    | <b>Male</b>               | 1060 (44)                                          | 558 (50)                                             |
| <b>Age, Median (IQR)</b>           |                           |                                                    |                                                      |
|                                    |                           | 40 (32-47)                                         | 37 (31-45)                                           |
| <b>Age category, n (%)</b>         |                           |                                                    |                                                      |
|                                    | <b>&lt;30 years</b>       | 453 (19)                                           | 258 (23)                                             |
|                                    | <b>30-40 years</b>        | 828 (34)                                           | 416 (37)                                             |
|                                    | <b>40-50 years</b>        | 815 (34)                                           | 304 (27)                                             |
|                                    | <b>&gt;50 years</b>       | 319 (13)                                           | 133 (12)                                             |
| <b>Education category</b>          |                           |                                                    |                                                      |
|                                    | <b>None</b>               | 132 (5)                                            | 36 (3)                                               |
|                                    | <b>Primary</b>            | 654 (27)                                           | 166 (15)                                             |
|                                    | <b>Secondary</b>          | 1134 (47)                                          | 645 (58)                                             |
|                                    | <b>University</b>         | 150 (6)                                            | 100 (9)                                              |
|                                    | <b>Missing</b>            | 307 (13)                                           | 151 (14)                                             |
| <b>HIV Enrollment Stage</b>        |                           |                                                    |                                                      |
|                                    | <b>WHO Stage 1</b>        | 1173 (49)                                          | 533 (48)                                             |
|                                    | <b>WHO Stage 2</b>        | 314 (13)                                           | 147 (13)                                             |
|                                    | <b>WHO Stage 3</b>        | 355 (15)                                           | 162 (15)                                             |
|                                    | <b>WHO Stage 4</b>        | 27 (1)                                             | 7 (1)                                                |
|                                    | <b>Missing</b>            | 546 (23)                                           | 262 (24)                                             |
| <b>Care status at survey visit</b> |                           |                                                    |                                                      |
|                                    | <b>In care</b>            | 2038 (84)                                          | 664 (60)                                             |
|                                    | <b>Returning to care</b>  | 377 (16)                                           | 447 (40)                                             |
| <b>Marital Status</b>              |                           |                                                    |                                                      |
|                                    | <b>Single</b>             | 257 (11)                                           | 167 (15)                                             |
|                                    | <b>Married</b>            | 1361 (56)                                          | 575 (52)                                             |
|                                    | <b>Divorced</b>           | 248 (10)                                           | 108 (10)                                             |
|                                    | <b>Widowed</b>            | 173 (7)                                            | 81 (7)                                               |
|                                    | <b>Unknown</b>            | 41 (2)                                             | 20 (2)                                               |
|                                    | <b>Missing</b>            | 335 (14)                                           | 160 (14)                                             |
| <b>Facility size</b>               |                           |                                                    |                                                      |
|                                    | <b>&lt; 1000 patients</b> | 591 (25)                                           | 245 (22)                                             |
|                                    | <b>1000-5000 patients</b> | 897 (37)                                           | 485 (44)                                             |
|                                    | <b>&gt; 5000 patients</b> | 927 (38)                                           | 381 (34)                                             |

Table 2 shows the absolute responses for TEC and UEC. Although most patients reported a good experience, across the questions between 5% and 25% of patients reported poor experiences

in care. For example, when asked if their HIV care provider gave them as much information about their health as they wanted, 13.4% (UEC) vs 24.6% (TEC) of patients reported not being provided with sufficient information about their health. Similarly, between 9.6% vs 18.8% patients reported that their HIV care provider was not spending the right amount of time with them at their visit, and 6.8% vs 16.4% reported witnessing rude behaviour.

**Table 2. Survey responses by training status**

| Factor                                                                                          | Level          | Untrained Exit Client n (%) | Trained Exit Client n (%) |
|-------------------------------------------------------------------------------------------------|----------------|-----------------------------|---------------------------|
| <b>Did your HIV care provider greet you in a way that made you feel comfortable?</b>            | Yes            | 2249 (93.1)                 | 980 (88.2)                |
|                                                                                                 | No             | 166 (6.9)                   | 131 (11.8)                |
| <b>Did your HIV care provider listen to what you said?</b>                                      | Yes            | 2328 (96.4)                 | 1039 (93.5)               |
|                                                                                                 | No             | 79 (3.3)                    | 64 (5.8)                  |
|                                                                                                 | Refused        | 8 (0.3)                     | 8 (0.7)                   |
| <b>Did your HIV care provider give you as much information about your health as you wanted?</b> | Yes            | 2092 (86.6)                 | 838 (75.4)                |
|                                                                                                 | No             | 323 (13.4)                  | 273 (24.6)                |
| <b>Did your HIV care provider allow you to ask questions?</b>                                   | Yes            | 2082 (86.2)                 | 887 (79.8)                |
|                                                                                                 | No             | 326 (13.5)                  | 222 (20)                  |
|                                                                                                 | Refused        | 7 (0.3)                     | 2 (0.2)                   |
| <b>Did your HIV care provider spend the right amount of time with you?</b>                      | Yes            | 2179 (90.2)                 | 900 (81)                  |
|                                                                                                 | No             | 232 (9.6)                   | 209 (18.8)                |
|                                                                                                 | Refused        | 4 (0.2)                     | 2 (0.2)                   |
| <b>Overall, how did you feel about the care you received today?</b>                             | Happy          | 2231 (92.4)                 | 983 (88.5)                |
|                                                                                                 | Unhappy        | 178 (7.4)                   | 123 (11.1)                |
|                                                                                                 | Refused        | 6 (0.2)                     | 5 (0.4)                   |
| <b>Overall, were you satisfied with all your HIV care providers today?</b>                      | Yes            | 2206 (91.4)                 | 906 (81.5)                |
|                                                                                                 | No             | 208 (8.6)                   | 202 (18.2)                |
|                                                                                                 | Refused        | 1 (0.0)                     | 3 (0.3)                   |
| <b>I witnessed HIV care providers behaving rudely during my visit today</b>                     | No             | 2251 (93.2)                 | 928 (83.5)                |
|                                                                                                 | Yes            | 163 (6.8)                   | 182 (16.4)                |
|                                                                                                 | Refused        | 1 (0.0)                     | 1 (0.1)                   |
| <b>Were your lab results lost?</b>                                                              | No             | 2143 (88.7)                 | 985 (88.7)                |
|                                                                                                 | Yes            | 268 (11.1)                  | 126 (11.3)                |
|                                                                                                 | Not picking up | 4 (0.2)                     | 0 (0)                     |
| <b>Were you able to pick up your</b>                                                            | Yes            | 2366 (98.0)                 | 1087 (97.8)               |

|                        |                     |          |          |
|------------------------|---------------------|----------|----------|
| <b>medicine today?</b> | No                  | 48 (2.0) | 24 (2.2) |
|                        | Not Picking Up Meds | 1 (0.0)  | 0 (0)    |

### Effects of training on response patterns: sum score and prevalence ratios

In adjusted models, TECs overall reported poor experiences in care: 1.64 times as frequently as UEC respondents (Sum Score Rate Ratio [RR]: 1.64 [95% CI: 1.39-1.94] (Fig 1, Supplementary Table S1), and reported an increased prevalence of poor experiences in care quality compared to untrained across almost all questions. For example; among TECs compared to UECs, there was an increased prevalence of reports of not being greeted in a way that made them feel welcome (adjusted Prevalence Ratio [aPR]: 1.71 [95% CI: 1.20-2.44]), reporting being dissatisfied with all their HIV care providers during their HIV care visit (aPR: 2.06 [95% CI: 1.61-2.63]) and witnessing any providers behaving rudely during their visit (aPR: 2.28 [95% CI: 1.63-3.19]) (Fig 1, Supplementary Table S1).

### Impact of training across age, sex, and gender to differences in responses

In stratified analysis of the impact of training on the sum score, training was consistently associated with increased identification of poor experiences in care across all subgroups apart from those aged 50 years or older and those with no education. We also observed that training had a larger impact among females compared to males, those with a primary education only, and among individuals presenting at smaller facilities (Fig 2). We observed similarities in responses on the impact of training on different age categories, sex, care status and different levels of education when we looked at individual questions except for the question on providers spending the right amount of time where we found that females were twice as likely to report lapses with care compared to males (Supplementary Figure 1). Using TECs gave worse assessments of patient experience at the facility-level regardless of facility size compared to UECs (Fig 3, Supplementary Figure 2).



## DISCUSSION

Disengaged patients often express a disconnect between their care expectations and the provider's style, hence experience is bound to vary across facilities [8]. This disconnect can lead to dissatisfaction with HIV services which can often lead to patients dropping out of care[8,11,29]. A brief training for patients living with HIV on how to evaluate the quality and experience of routine care changed patient experience reports compared to untrained patients using the same instrument. Patients who underwent a brief training identified more lapses in care across most questions. Women and young people were more likely to report critical responses after training - consistent with the idea that those who feel least empowered underwent the biggest change. Differences were also bigger for questions in which social desirability is likely to operate. For example, larger differences were observed for witnessing rude behaviour, while no differences were observed for more objective questions such as whether lab results were lost.

Improving HIV health outcomes requires new strategies that minimise methodological biases and includes everyone the patient encounters during their visit, including clinical officers, doctors, nurses, data clerks, and lay HCWs. Our TEC approach could contribute to getting a true reflection of how much value patients place on things such as effective communication, being greeted appropriately, or being treated with care and respect at all these different touch points. Involving patients in their own care and design of health services has been linked to improved HIV care retention and patient outcomes, such as higher viral suppression rates [30–32]. As progress is being made towards UNAIDS 95-95-95 targets, the global HIV sector is constantly reviewing priorities and challenges for optimal engagement in care [33,34]. Patient experience is a key indicator of

1  
2  
3 355 healthcare quality for meeting the 95-95-95 targets: delivering services patients need, can access,  
4  
5  
6 356 and address wider determinants of poor health. Clinicians and health systems must address HIV  
7  
8 357 patients' needs from diagnosis to death to ensure healthy ageing and viral suppression. Other  
9  
10 358 outcomes in Zambia [11,35,36] show that lifelong needs vary by facility, highlighting the  
11  
12 359 importance of metrics that measure patient experience accurately. We have shown that it is feasible  
13  
14  
15 360 to involve patients in assessing the quality of care and this could potentially lead to involvement of  
16  
17 361 patients in the redesign of healthcare services.  
18

19 362 Because HIV care is longitudinal, SP, who are often used to evaluate episodic care, require  
20  
21  
22 363 highly skilled people to pose as a simulated patient making one visit to multiple clinics, posing  
23  
24 364 practical implementation challenges in our setting[19–24]. Contrary to SP, we evaluated care quality  
25  
26 365 without using simulated patients and administered the survey once among people in long term care.  
27  
28  
29 366 Using real patients instead of simulated ones drawn from outside the true patient population, we  
30  
31 367 would argue, made our TEC approach more applicable and reproducible in clinical settings. We  
32  
33 368 were able to record HCW behaviour in a typical HIV context using this concealment method,  
34  
35 369 potentially reducing the impact of the Hawthorne effect. Our TECs also consistently identified more  
36  
37  
38 370 lapses in care, potentially reducing social desirability bias and ability to identify issues at the facility.  
39  
40 371 Even though training takes time, the increased quality of our measurement allows one to perform  
41  
42 372 fewer surveys. With traditional approaches like exit surveys, one would require a larger sample size,  
43  
44  
45 373 but this does not address bias [37].  
46

47 374 Our findings are consistent with a study done in South Africa which found that non-clinical  
48  
49 375 dimensions of care play a bigger role in determining an overall satisfactory experience for  
50  
51  
52 376 standardised patients when compared to untrained patients[37]. However, our findings may  
53  
54 377 contradict previous suggestions that tailoring support to individuals to build skills and confidence  
55  
56  
57  
58  
59  
60

1  
2  
3 378 through patient activation can lead to trained/informed patients reporting a better experience than  
4  
5  
6 379 untrained/ uninformed [38]. TECs cared about the following non-clinical aspects of care: rude  
7  
8 380 providers, being satisfied with HIV care providers, and spending enough time with providers. This  
9  
10 381 finding is consistent with a previous study in Zambia, where patients reported rude HCWs deterring  
11  
12 382 HIV care engagement [8,10,11]. This could mean that studies assessing patient experience with TEC  
13  
14  
15 383 could focus on a few questions to save time and resources. Questions like, "Did you pick up your  
16  
17 384 medicine or lab results at your visit?" may not add much to a TEC survey because they are definitive,  
18  
19 385 and training appears to influence subjective care dimensions.

21  
22 386 Women TECs were generally more critical about the care they received and would likely  
23  
24 387 provide a more accurate reflection of the health system, possibly because they have better health-  
25  
26 388 seeking behaviour than men, which may be strongly influenced by local gender norms and health  
27  
28  
29 389 service structures designed to engage women of reproductive age [39]. There is some consistency  
30  
31 390 with other findings that women may be more interested in their care than men, especially in facilities  
32  
33 391 that provide integrated services for women and their children [9,40]. Despite longer wait times,  
34  
35 392 women were more satisfied with integrated facilities [41]. In addition, middle-aged people between  
36  
37  
38 393 40-50 benefited the most from training. Compared to older people over 50, younger people under  
39  
40 394 30 were less satisfied with the care they received and often felt they were not greeted by a HCW  
41  
42 395 during their visit. This finding is consistent with cultural norms where younger people are less  
43  
44  
45 396 respected[42]. Given the current strategy of targeting young people, who account for most new  
46  
47 397 infections, these findings suggest an important new approach to identifying what young people value  
48  
49 398 most. Education level was among the strongest predictors of patient experience feedback. Well-  
50  
51  
52 399 educated patients were found to have a less critical/better HIV care visit experience compared to  
53  
54 400 participants with lower levels of educational attainment. This difference in care experience report

1  
2  
3 401 may be associated, at least in part, with the HCW perception of the patient in the facility. Research  
4  
5 402 conducted in Nigeria discovered that people with higher levels of education are frequently given  
6  
7  
8 403 better and more considerate treatment by HCW, hence limited by a form of discrimination/  
9  
10 404 socioeconomic status bias [43,44].

11  
12 405 The observed effect of training on patient experience is likely multifaceted potentially  
13  
14  
15 406 stemming from increased attention and recall to the exit survey items which solicited a feeling of  
16  
17 407 empowerment to be more critical of the care received. In future studies, patient activation should be  
18  
19 408 measured as an outcome to see how training changes the patient's engagement with their care over  
20  
21  
22 409 time [38]. Further research is required into why women TECs reported poorer experiences with care  
23  
24 410 than men. Other studies that have used SP to assess medical students' performance showed that  
25  
26 411 women were more critical on certain aspects of care. These studies also recommend matching of  
27  
28  
29 412 SPs to clinicians by sex [45], something we were not able to do given the nature of our study in  
30  
31 413 primary health facilities where we assessed interpersonal communication with HCWs at all levels.  
32  
33 414 Perhaps our findings call for more investigation into the integration of women's services, such as  
34  
35 415 family planning and children's services with HIV care given some studies have shown this can  
36  
37  
38 416 improve patient satisfaction.

### 40 417 **Limitations**

41  
42 418 Our findings should be interpreted with caution due to the following limitations. Because this  
43  
44  
45 419 was the first time such a study was done, we recruited educated participants who were able to read  
46  
47 420 and write, perceived to have good recall ability and were able to comprehend things. Our study was  
48  
49 421 only done in Lusaka province in facilities that were largely urban except for one facility which was  
50  
51  
52 422 peri-urban hence it is hard to generalise these findings. Another limitation in our approach is the  
53  
54 423 one-time cross-sectional nature of our measurements among people in long term HIV care. If more  
55  
56  
57  
58  
59  
60

1  
2  
3 424 measures were collected from each TEC, we may well see them being activated in a way that results  
4  
5  
6 425 in an improvement in their experience based on the skills they develop to seek better care from  
7  
8 426 providers which ultimately would improve their retention in care. Despite its limitations, the TEC  
9  
10 427 method provides valuable information about healthcare quality, even though it is limited to  
11  
12 428 situations where "walk-ins" are permitted. Our approach only focused on real patients accessing  
13  
14  
15 429 care and we did not manipulate any patient files, so it is possible that some TECs were known to the  
16  
17 430 facility as patients accessing chronic care. Our approach does require a trained interviewer to speak  
18  
19 431 with TECs after their visits, but this is not any different to what already exists. In future, it may be  
20  
21  
22 432 worth using the domains in the national HIV guidelines as the gold standard, but we did not do this  
23  
24 433 as our aim was to come up with a low-cost approach that can easily be rolled out. In addition, the  
25  
26 434 concept of patient centred care is still catching on in Zambia. Our TEC approach can be used to  
27  
28  
29 435 further the knowledge in provider attitudes to other relatively new approaches to delivering quality  
30  
31 436 HIV care such as differentiated service delivery (DSD) for stable patients by assessing whether  
32  
33 437 HCWs follow guidelines when offering this [34]. We also see an opportunity to assess provider  
34  
35 438 patient communication of viral load laboratory results by use of a universal script for each TEC to  
36  
37  
38 439 assess if they are communicated to and if unsuppressed but adherent, what procedures followed.

## 41 440 **Conclusion**

42  
43  
44  
45 441 TEC offers pragmatic methods for health systems in low-income countries to assess non-  
46  
47 442 clinical dimensions of care (communication, respect, and autonomy) which are grounded on the  
48  
49 443 concept of health-system responsiveness and could be critical to the transformation of low-quality  
50  
51  
52 444 health systems to high quality ones[46]. Hawthorne effects and social desirability biases may be  
53  
54 445 mitigated using TECs. We were able to capture HCWs behaviour in a normal day to day low middle  
55  
56  
57  
58  
59  
60

1  
2  
3 446 income setting using similar approaches recommended by King and colleagues that minimise harm  
4  
5  
6 447 to HCWs and SPs [15]. Our findings suggest that TECs provide a more critical appraisal of some  
7  
8 448 aspects of the quality of HIV care. It provides new insights in the Zambian context on what patients'  
9  
10 449 value when they interact with the health system. This could be important given the need to reduce  
11  
12 450 loss to follow up among new ART clients who disengage within the first 6 months of treatment due  
13  
14  
15 451 to a bad first encounter with the health system. Our TEC approach could be used to assess  
16  
17 452 reengagement interventions. The fact that TECs had a better understanding of the items solicited or  
18  
19 453 felt empowered to be more critical shows that the training we provided worked. This low-cost  
20  
21  
22 454 method could be reproduced in other routine settings and presents an opportunity to further  
23  
24 455 institutionalise patient centred care by evaluating what happens at the point of contact between the  
25  
26 456 patient, the health facility, and the health provider. The implications are that it provides an  
27  
28  
29 457 opportunity to improve HIV care, meet patients' expectations and can serve as a monitoring tool for  
30  
31 458 healthcare performance. Coupled with the recent approaches to client led monitoring in HIV care,  
32  
33 459 our approach can be used to enhance decision making that considers patients' involvement.  
34

### **Data Availability Statement**

The Government of Zambia allows data sharing when applicable local conditions are satisfied. In this case, the data from the study will be made available to any interested researchers upon request. The CIDRZ Ethics and Compliance Committee is responsible for approving such request. To request data access, one must write to the Secretary to the Committee/Head of Research Operations, Mrs. Hope Chinganya ([Hope.Chinganya@cidrz.org](mailto:Hope.Chinganya@cidrz.org)) mentioning the intended use for the data. The Committee will then facilitate review and authorization to release the data as requested. Data requests must include contact information, a research project title, and a description of the intended use.

### **Funding**

This work was supported, in whole or in part, by the Bill & Melinda Gates Foundation [INV-010563]. Under the grant conditions of the Foundation, a Creative Commons Attribution 4.0 Generic License has already been assigned to the Author Accepted Manuscript version that might arise from this submission. This work was also supported by the National Center for Advancing Translational Sciences (grant KL2 TR002346 to Dr Mody) and the National Institute of Allergy and Infectious Diseases (grant K24 AI134413 to Dr Geng). The funders had no role in study design, data collection and analysis, decision to publish, or preparation of the manuscript.

### **Disclaimer**

The contents of this paper are the sole responsibility of the authors and do not necessarily reflect the views of the Bill & Melinda Gates Foundation.

**Competing interest:** Non declared

## Acknowledgements

We would like to thank recipients of care for taking part in this study. We would like to thank the  
Zambian Ministry of Health, the US President's Emergency Plan for AIDS Relief (PEPFAR)  
through the US Centers for Disease Control and Prevention/Zambia (CDC) and the Centre for  
Infectious Disease Research in Zambia for their leadership in ensuring those in HIV care continue  
to receive life-saving HIV treatment. We would also like to thank the healthcare workers who  
continued to faithfully deliver HIV care in the face of the COVID-19 pandemic

## Contributors

KS: guarantor, lead author, conducted all analyses, led data management activities, field  
coordination of activities and designed data collection tools. JMP: field coordination of data, assisted  
with analysis and revising it critically for important intellectual content, designed data collection  
tools. AM: assisted with analysis, framing, and revising it critically for important intellectual content.  
BR: final approval for publication, assisted with framing and revising it critically for important  
intellectual content CB: field coordination of data quality processes and data acquisition IEW:  
drafted statistical analysis plan, assisted with conceptualisation and interpretation of data. JM:  
assisted with data acquisition and cleaning, field coordination of data quality processes. SS: led  
intervention implementation, project administration and data curation. LKB, NM, AS: cognitively  
tested data collection tools, assisted with conceptualization, underlying data processes, and assisted  
with writing and data interpretation. DM, MM-M: advised implementation details. AW, JH: assisted  
with framing and revising it critically for important intellectual content. CBM: lead for underlying  
data processes and assisted with funding acquisition. CBH: funding acquisition, assisted with  
conceptualisation and advised regarding intervention implementation details. IS: funding



1  
2  
3 514 acquisition, assisted with conceptualisation and manuscript writing. EHG: funding acquisition, led  
4  
5 515 conceptualisation and advised on all analyses, final approval for publication.  
6  
7

### 8 516 **Statement of Ethics Approval**

9 517  
10 518 Ethics approval to conduct this research was granted by the Zambian Ministry of Health,  
11  
12 519 National Health Research Authority, and the institutional review boards of the University of Zambia  
13  
14 (008-03-19), the University of Alabama at Birmingham (300003282) and the London School of  
15 520  
16  
17 521 Hygiene and Tropical Medicine (21384).  
18  
19  
20 522  
21  
22 523  
23  
24 524  
25  
26 525  
27  
28  
29 526  
30  
31 527  
32  
33 528  
34  
35  
36 529  
37  
38 530  
39  
40 531  
41  
42  
43  
44  
45  
46  
47  
48  
49  
50  
51  
52  
53  
54  
55  
56  
57  
58  
59  
60

## REFERENCES

- 1 UNAIDS JUNP on H-G. *In Danger: UNAIDS Global AIDS Update 2022*. 2022. doi:10.18356/9789210019798
- 2 Institute of Medicine & Committee on Quality of Health Care in America. *Crossing the Quality Chasm: A New Health System for the 21st Century*. 2001. doi:10.1136/bmj.323.7322.1192
- 3 World Health Organization. Maintaining and Improving Quality of Care Within HIV Clinical Services. 2019. <http://apps.who.int/bookorders>. (accessed 11 Mar 2020).
- 4 Edmonds KA, Aspiras OG, Rose JP, *et al*. Cross-sectional evaluation of perceived health care provider engagement, self-efficacy, and ART adherence in people living with HIV/AIDS. *AIDS Care* 2021;**33**:154–8. doi:10.1080/09540121.2019.1703889
- 5 Bakken S, Holzemer WL, Brown MA, *et al*. Relationships between perception of engagement with health care provider and demographic characteristics, health status, and adherence to therapeutic regimen in persons with HIV/AIDS. *AIDS Patient Care STDS* 2000;**14**:189–97. doi:10.1089/108729100317795
- 6 Okoli C, Brough G, Allan B, *et al*. Shared Decision Making Between Patients and Healthcare Providers and its Association with Favorable Health Outcomes Among People Living with HIV. *AIDS Behav* 2021;**25**:1384–95. doi:10.1007/s10461-020-02973-4
- 7 Kwan A, Daniels B, Bergkvist S, *et al*. Use of standardised patients for healthcare quality research in low- and middle-income countries. *BMJ Glob Health* 2019;**4**:e001669. doi:10.1136/bmjgh-2019-001669
- 8 Mwamba C, Sharma A, Mukamba N, *et al*. ‘They care rudely!’: resourcing and relational health system factors that influence retention in care for people living with HIV in Zambia. *BMJ Glob Health* 2018;**3**:e001007. doi:10.1136/bmjgh-2018-001007
- 9 Topp SM, Mwamba C, Sharma A, *et al*. Rethinking retention: Mapping interactions between multiple factors that influence long-term engagement in HIV care. *PLoS One* 2018;**13**:e0193641. <https://doi.org/10.1371/journal.pone.0193641>
- 10 Zanolini A, Sikombe K, Sikazwe I, *et al*. Understanding preferences for HIV care and treatment in Zambia: Evidence from a discrete choice experiment among patients who have been lost to follow-up. *PLoS Med* 2018;**15**:e1002636. doi:10.1371/JOURNAL.PMED.1002636
- 11 Sikazwe I, Eshun-Wilson I, Sikombe K, *et al*. Patient-reported Reasons for Stopping Care or Switching Clinics in Zambia: A Multi-site, Regionally Representative estimate using a multi-stage sampling-based approach in Zambia. *Clinical Infectious Diseases* Published Online First: 2020. doi:10.1093/cid/ciaa1501
- 12 Mody A, Sikombe K, Beres LK, *et al*. Profiles of HIV Care Disruptions Among Adult Patients Lost to Follow-up in Zambia. *JAIDS Journal of Acquired Immune Deficiency Syndromes* 2020;**Publish Ah**. doi:10.1097/qai.0000000000002530
- 13 Porter LE, Bouey PD, Curtis S, *et al*. Beyond indicators: Advances in global HIV monitoring and evaluation during the PEPFAR era. *J Acquir Immune Defic Syndr (1988)* 2012;**60**. doi:10.1097/QAI.0b013e31825cf345
- 14 MILLER FRANCO L, FRANCO C, KUMWENDA N, *et al*. Methods for assessing quality of provider performance in developing countries. *International Journal for Quality in Health Care* 2002;**14**:17–24. doi:10.1093/intqhc/14.suppl\_1.17
- 15 King JJC, Das J, Kwan A, *et al*. How to do (or not to do) ... using the standardized patient method to measure clinical quality of care in LMIC health facilities. *Health Policy Plan* 2019;**34**:625–34. doi:10.1093/heapol/czz078

- 1  
2  
3 16 Onishi J, Gupta S, Peters DH. Comparative analysis of exit interviews and direct clinical  
4 observations in Pediatric Ambulatory Care Services in Afghanistan. *International Journal for*  
5 *Quality in Health Care* 2011;**23**:76–82. doi:10.1093/intqhc/mzq074  
6  
7 17 Luck J, Peabody JW. Using standardised patients to measure physicians' practice:  
8 validation study using audio recordings. *BMJ* 2002;**325**:679. doi:10.1136/bmj.325.7366.679  
9  
10 18 Beullens J, Rethans JJ, Goedhuys J, *et al*. The use of standardized patients in research in general  
11 practice. *Fam Pract* 1997;**14**:58–62. doi:10.1093/fampra/14.1.58  
12  
13 19 Weiner SJ, Schwartz A. Directly observed care: Can unannounced standardized patients address a  
14 gap in performance measurement? *J Gen Intern Med* 2014;**29**:1183–7. doi:10.1007/s11606-014-  
15 2860-7  
16  
17 20 Nestel D, Bearman M. *Simulated Patient Methodology: Theory, Evidence and Practice*. 2014.  
18 doi:10.1002/9781118760673  
19  
20 21 Larsen A, Wilson KS, Kinuthia J, *et al*. Standardised patient encounters to improve quality of  
21 counselling for pre-exposure prophylaxis (PrEP) in adolescent girls and young women (AGYW)  
22 in Kenya: study protocol of a cluster randomised controlled trial. *BMJ Open* 2020;**10**:e035689–  
23 e035689. doi:10.1136/bmjopen-2019-035689  
24  
25 22 Daniels B, Dolinger A, Bedoya G, *et al*. Use of standardised patients to assess quality of  
26 healthcare in Nairobi, Kenya: A pilot, cross-sectional study with international comparisons. *BMJ*  
27 *Glob Health* Published Online First: 2017. doi:10.1136/bmjgh-2017-000333  
28  
29 23 Zabar S, Hanley K, Stevens D, *et al*. Unannounced standardized patients: A promising method of  
30 assessing patient-centered care in your health care system. *BMC Health Serv Res* 2014;**14**.  
31 doi:10.1186/1472-6963-14-157  
32  
33 24 Boffa J, Moyo S, Chikovore J, *et al*. Quality of care for tuberculosis and HIV in the private health  
34 sector: a cross-sectional, standardised patient study in South Africa. *BMJ Glob Health*  
35 2021;**6**:e005250. doi:10.1136/bmjgh-2021-005250  
36  
37 25 Wachira J, Middlestadt S, Reece M, *et al*. Psychometric assessment of a physician-patient  
38 communication behaviors scale: The perspective of adult HIV patients in Kenya. *AIDS Res Treat*  
39 2013;**2013**. doi:10.1155/2013/706191  
40  
41 26 Campbell C, Lockyer J, Laidlaw T, *et al*. Assessment of a matched-pair instrument to examine  
42 doctor–patient communication skills in practising doctors. *Med Educ* 2007;**41**:123–9.  
43 doi:https://doi.org/10.1111/j.1365-2929.2006.02657.x  
44  
45 27 Bieber C, Müller KG, Nicolai J, *et al*. How Does Your Doctor Talk with You? Preliminary  
46 Validation of a Brief Patient Self-Report Questionnaire on the Quality of Physician–Patient  
47 Interaction. *J Clin Psychol Med Settings* 2010;**17**:125–36. doi:10.1007/s10880-010-9189-0  
48  
49 28 Zou G. A Modified Poisson Regression Approach to Prospective Studies with Binary Data. *Am J*  
50 *Epidemiol* 2004;**159**:702–6. doi:10.1093/aje/kwh090  
51  
52 29 Shabalala FS, Vernooij E, Pell C, *et al*. Understanding reasons for discontinued antiretroviral  
53 treatment among clients in test and treat: a qualitative study in Swaziland. *J Int AIDS Soc*  
54 2018;**21**:e25120. doi:10.1002/jia2.25120  
55  
56 30 Grimsrud A, Bygrave H, Doherty M, *et al*. Reimagining HIV service delivery : the role of  
57 differentiated care from prevention to suppression. *J Acquir Immune Defic Syndr* 2016;:10–2.  
58 doi:10.7448/IAS.19.1.21484  
59  
60 31 Camlin CS, Neilands TB, Odeny TA, *et al*. Patient-reported factors associated with reengagement  
among HIV-infected patients disengaged from care in East Africa. *AIDS* 2015;:1.  
doi:10.1097/QAD.0000000000000931

- 1  
2  
3 32 Geng EH, Bangsberg DR, Musinguzi N, *et al.* Understanding Reasons for and Outcomes of  
4 Patients Lost to Follow-Up in Antiretroviral Therapy Programs in Africa Through a Sampling-  
5 Based Approach. *JAIDS Journal of Acquired Immune Deficiency Syndromes* 2010;**53**:405–11.  
6 doi:10.1097/QAI.0b013e3181b843f0  
7  
8 33 Ford N, Geng E, Ellman T, *et al.* Emerging priorities for HIV service delivery. *PLoS Med*  
9 2020;**17**:e1003028. doi:10.1371/JOURNAL.PMED.1003028  
10  
11 34 Ehrenkranz P, Grimsrud A, Holmes CB, *et al.* Expanding the Vision for Differentiated Service  
12 Delivery: A Call for More Inclusive and Truly Patient-Centered Care for People Living With  
13 HIV. *J Acquir Immune Defic Syndr* 2021;**86**:147. doi:10.1097/QAI.0000000000002549  
14  
15 35 Holmes CB, Sikazwe I, Sikombe K, *et al.* Estimated mortality on HIV treatment among active  
16 patients and patients lost to follow-up in 4 provinces of Zambia: Findings from a multistage  
17 sampling-based survey. *PLoS Med* 2018;**15**:e1002489. doi:10.1371/journal.pmed.1002489  
18  
19 36 Sikazwe I, Eshun-Wilson I, Sikombe K, *et al.* Retention and viral suppression in a cohort of HIV  
20 patients on antiretroviral therapy in Zambia: Regionally representative estimates using a  
21 multistage-sampling-based approach. *PLoS Med* 2019;**16**:1–17.  
22 doi:10.1371/journal.pmed.1002811  
23  
24 37 Hompashe DM, Gerdtham U-G, Christian CS, *et al.* ‘The nurse did not even greet me’: how  
25 informed versus non-informed patients evaluate health systems responsiveness in South Africa.  
26 *BMJ Glob Health* 2021;**6**:e004360. doi:10.1136/bmjgh-2020-004360  
27  
28 38 Hibbard JH, Greene J. What The Evidence Shows About Patient Activation: Better Health  
29 Outcomes And Care Experiences; Fewer Data On Costs. *Health Aff* 2013;**32**:207–14.  
30 doi:10.1377/hlthaff.2012.1061  
31  
32 39 Colvin CJ. Strategies for engaging men in HIV services. *Lancet HIV*. 2019;**6**:e191–200.  
33 doi:10.1016/S2352-3018(19)30032-3  
34  
35 40 Kerkhoff AD, Sikombe K, Eshun-Wilson I, *et al.* Mortality estimates by age and sex among  
36 persons living with HIV after ART initiation in Zambia using electronic medical records  
37 supplemented with tracing a sample of lost patients: A cohort study. *PLoS Med*  
38 2020;**17**:e1003107. <https://doi.org/10.1371/journal.pmed.1003107>  
39  
40 41 Narasimhan M, Yeh PT, Haberlen S, *et al.* Integration of HIV testing services into family  
41 planning services: a systematic review. *Reprod Health* 2019;**16**:61. doi:10.1186/s12978-019-  
42 0714-9  
43  
44 42 Godia PM, Olenja JM, Lavussa JA, *et al.* Sexual reproductive health service provision to young  
45 people in Kenya; Health service providers’ experiences. *BMC Health Serv Res* 2013;**13**:1–13.  
46 doi:10.1186/1472-6963-13-476/TABLES/2  
47  
48 43 Roberts BW, Puri NK, Trzeciak CJ, *et al.* Socioeconomic, racial and ethnic differences in patient  
49 experience of clinician empathy: Results of a systematic review and meta-analysis. *PLoS One*  
50 2021;**16**:e0247259. <https://doi.org/10.1371/journal.pone.0247259>  
51  
52 44 Aloh HE, Onwujekwe OE, Aloh OG, *et al.* Impact of socioeconomic status on patient experience  
53 on quality of care for ambulatory healthcare services in tertiary hospitals in Southeast Nigeria.  
54 *BMC Health Serv Res* 2020;**20**:473. doi:10.1186/s12913-020-05332-0  
55  
56 45 Humphrey-Murto S, Touchie C, Wood TJ, *et al.* Does the gender of the standardised patient  
57 influence candidate performance in an objective structured clinical examination? *Med Educ*  
58 2009;**43**:521–5. doi:10.1111/j.1365-2923.2009.03336.x  
59  
60 46 Kruk ME, Gage AD, Arsenault C, *et al.* High-quality health systems in the Sustainable  
Development Goals era: time for a revolution. *Lancet Glob Health*. 2018;**6**:e1196–252.  
doi:10.1016/S2214-109X(18)30386-3

1  
2  
3  
4  
5  
6 **Figure 1. Forest plot comparing responses from Trained Exit Clients (TEC) relative to**  
7 **Untrained Exit Clients (UEC) on 10 measures of clinic experience.** Points indicate the rate  
8 ratio (for sum score) or prevalence ratio (for all others) for identifying a lapse in care in TEC  
9 surveys as compared to UEC. The sum score represents the total number of binary responses (yes  
10 vs no) across all clients in one group shown as a rate ratio. The red line indicates a rate or  
11 prevalence ratio of 1 and values greater than this indicates more lapses in care identified in TECs.  
12 Results are based on mixed-effects models adjusted for age, sex, education with a random effect at  
13 the facility.  
14  
15

16 **Figure 2. Impact of Training on Identifying Care Lapses Stratified by Subgroups (N=3480).**  
17 When all questions were collapsed into a Sum score among TEC, females were more likely to report  
18 lapses in care quality than males. We observed some level of interaction for care status, age category,  
19 education category and facility size.  
20

21 **Figure 3. Bubble plot showing Trained Exit Sum Score vs Untrained Exit Sum Score.** Each  
22 bubble represents a single facility's performance. Each bubble's size indicates the number of patients  
23 at each facility with larger bubbles corresponding to larger facilities. The horizontal position notes  
24 the Untrained Exit Sum Score for all questions against the facility, and the vertical position notes  
25 the Trained Exit sum score at the same facility.  
26  
27  
28  
29  
30  
31  
32  
33  
34  
35  
36  
37  
38  
39  
40  
41  
42  
43  
44  
45  
46  
47  
48  
49  
50  
51  
52  
53  
54  
55  
56  
57  
58  
59  
60

1  
2  
3  
4  
5  
6  
7  
8  
9  
10  
11  
12  
13  
14  
15  
16  
17  
18  
19  
20  
21  
22  
23  
24  
25  
26  
27  
28  
29  
30  
31  
32  
33  
34  
35  
36  
37  
38  
39  
40  
41  
42  
43  
44  
45  
46  
47  
48  
49  
50  
51  
52  
53  
54  
55  
56  
57  
58  
59  
60



674x330mm (72 x 72 DPI)

1  
2  
3  
4  
5  
6  
7  
8  
9  
10  
11  
12  
13  
14  
15  
16  
17  
18  
19  
20  
21  
22  
23  
24  
25  
26  
27  
28  
29  
30  
31  
32  
33  
34  
35  
36  
37  
38  
39  
40  
41  
42  
43  
44  
45  
46  
47  
48  
49  
50  
51  
52  
53  
54  
55  
56  
57  
58  
59  
60



629x374mm (72 x 72 DPI)

1  
2  
3  
4  
5  
6  
7  
8  
9  
10  
11  
12  
13  
14  
15  
16  
17  
18  
19  
20  
21  
22  
23  
24  
25  
26  
27  
28  
29  
30  
31  
32  
33  
34  
35  
36  
37  
38  
39  
40  
41  
42  
43  
44  
45  
46  
47  
48  
49  
50  
51  
52  
53  
54  
55  
56  
57  
58  
59  
60

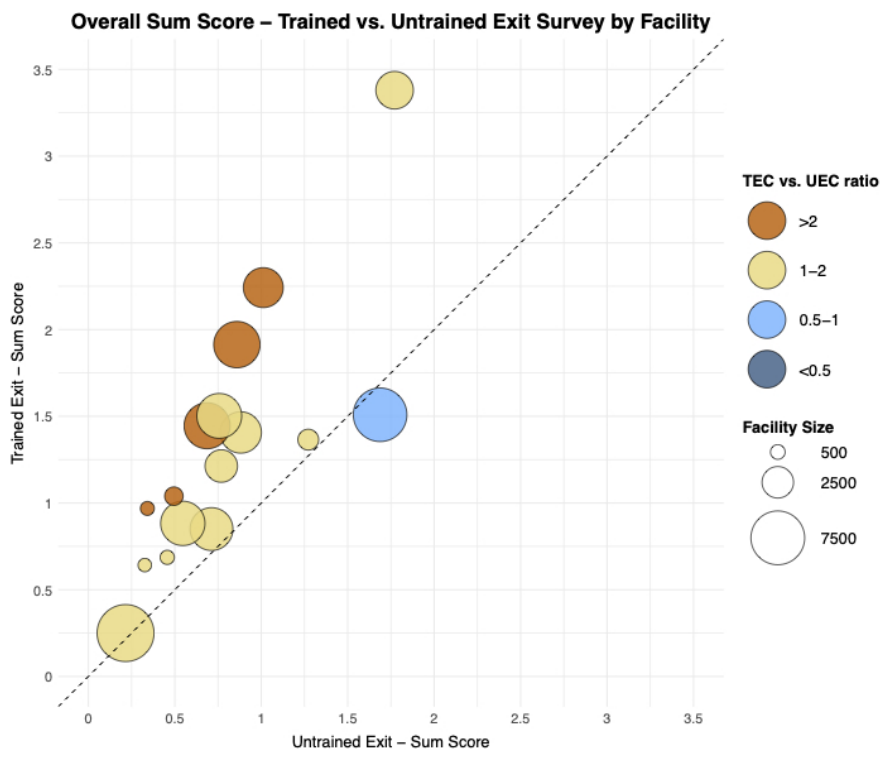

279x215mm (72 x 72 DPI)



## Supplementary Tables S1

**Supplementary Table S1. Mixed effect Poisson regression comparing 10 questions for Trained Exit Clients vs Untrained Exit Clients. Adjusted for age, sex, education, and study period.**

| Trained Exit Clients                                                                     | Prevalence ratio (PR) Unadjusted | P value | 95% Confidence Interval (CI) | PR-Adjusted | P value | 95% Confidence Interval (CI) | N    |
|------------------------------------------------------------------------------------------|----------------------------------|---------|------------------------------|-------------|---------|------------------------------|------|
| Sum score (Rate ratio)                                                                   | 1.73                             | <0.01   | 1.47-2.02                    | 1.64        | <0.01   | 1.39-1.94                    | 3480 |
| Did your HIV care provider greet you in a way that made you feel comfortable?            | 1.74                             | 0.01    | 1.24-2.44                    | 1.71        | <0.01   | 1.20-2.44                    | 3526 |
| Did your HIV care provider listen to what you said?                                      | 1.77                             | 0.09    | 0.91-3.45                    | 1.71        | 0.09    | 0.93-3.16                    | 3510 |
| Did your HIV care provider give you as much information about your health as you wanted? | 1.82                             | <0.01   | 1.43-2.33                    | 1.72        | <0.01   | 1.37-2.15                    | 3526 |
| Did your HIV care provider allow you to ask questions?                                   | 1.44                             | <0.01   | 1.20-1.73                    | 1.34        | <0.01   | 1.12-1.6                     | 3517 |
| Did your HIV care provider spend the right amount of time with you?                      | 1.94                             | <0.01   | 1.66-2.27                    | 1.85        | <0.01   | 1.58-2.17                    | 3520 |
| Overall, how did you feel about the care you received today?                             | 1.51                             | 0.02    | 1.06-2.16                    | 1.54        | 0.02    | 1.07-2.21                    | 3515 |
| Overall, were you satisfied with all your HIV care providers today?                      | 2.12                             | <0.01   | 1.68-2.66                    | 2.06        | <0.01   | 1.61-2.63                    | 3522 |
| I witnessed HIV care providers behaving rudely during my visit today                     | 2.39                             | <0.01   | 1.73-3.32                    | 2.28        | <0.01   | 1.63-3.19                    | 3524 |
| Were your lab results lost?                                                              | 0.99                             | 0.98    | 0.84-1.19                    | 0.99        | 0.93    | 0.78-1.26                    | 3522 |
| Were you able to pick up your medicine today?                                            | 1.04                             | 0.90    | 0.57-1.89                    | 1.26        | 0.55    | 0.59-2.71                    | 3525 |

1  
2  
3  
4  
5  
6  
7  
8  
9  
10  
11  
12  
13  
14  
15  
16  
17  
18  
19  
20  
21  
22  
23  
24  
25  
26  
27  
28  
29  
30  
31  
32  
33  
34  
35  
36  
37  
38  
39  
40  
41  
42  
43  
44  
45  
46  
47  
48  
49  
50  
51  
52  
53  
54  
55  
56  
57  
58  
59  
60

For peer review only

Supplementary Figure 1.

**Impact of Training on Identifying Care Lapses Stratified by Subgroups for 10 questions.** We observed some level of interaction for care status, age category, education category and facility size. Panel **a)** Greet you in a way that made you feel comfortable **b)** Listen to what you said **c)** Give you as much information about your health as you wanted **d)** Allowed you to ask questions, responded, happy q456 **e)** spend the right amount of time with you **f)** feel about the care you received today **g)** satisfied with all your HIV care providers today **h)** witnessed HIV care providers behaving rudely during my visit today **i)** lost lab results **j)** pick up meds

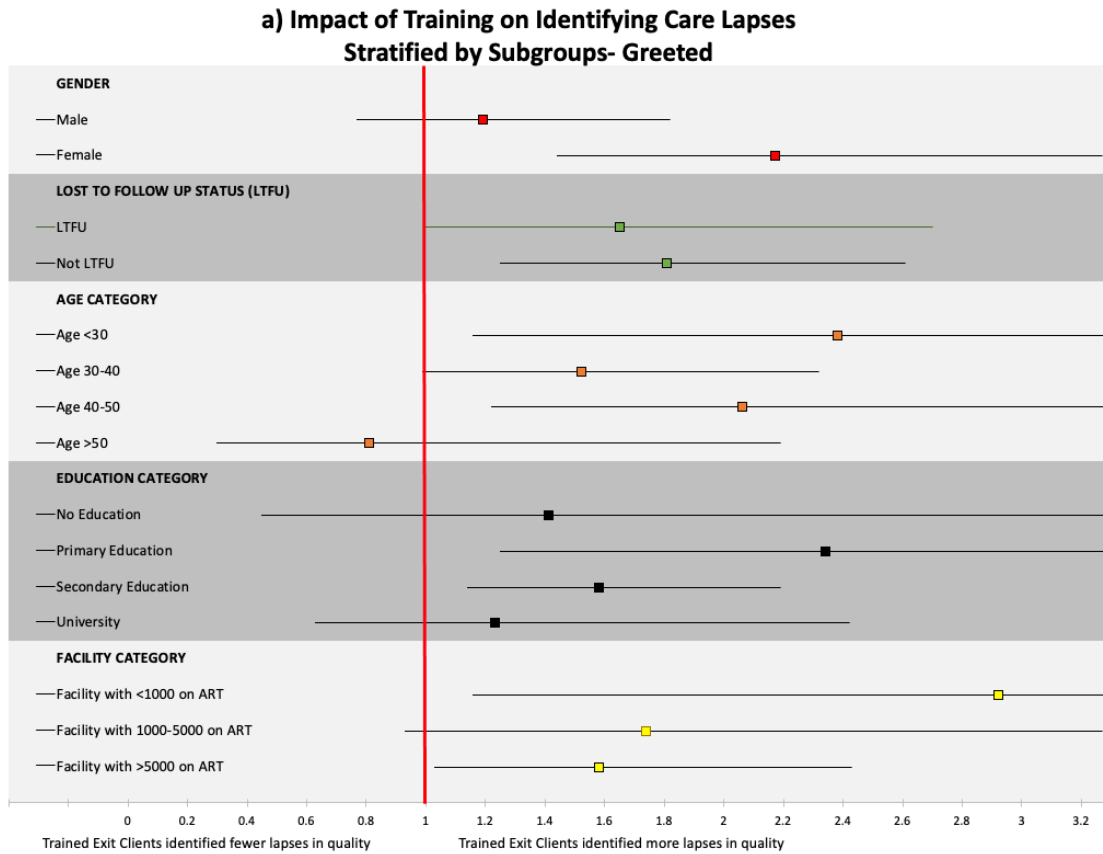

### b) Impact of Training on Identifying Care Lapses Stratified by Subgroups- Listened



ew only

**c) Impact of Training on Identifying Care Lapses  
Stratified by Subgroups- Information**



Review only

**d) Impact of Training on Identifying Care Lapses  
Stratified by Subgroups- Question\_456**

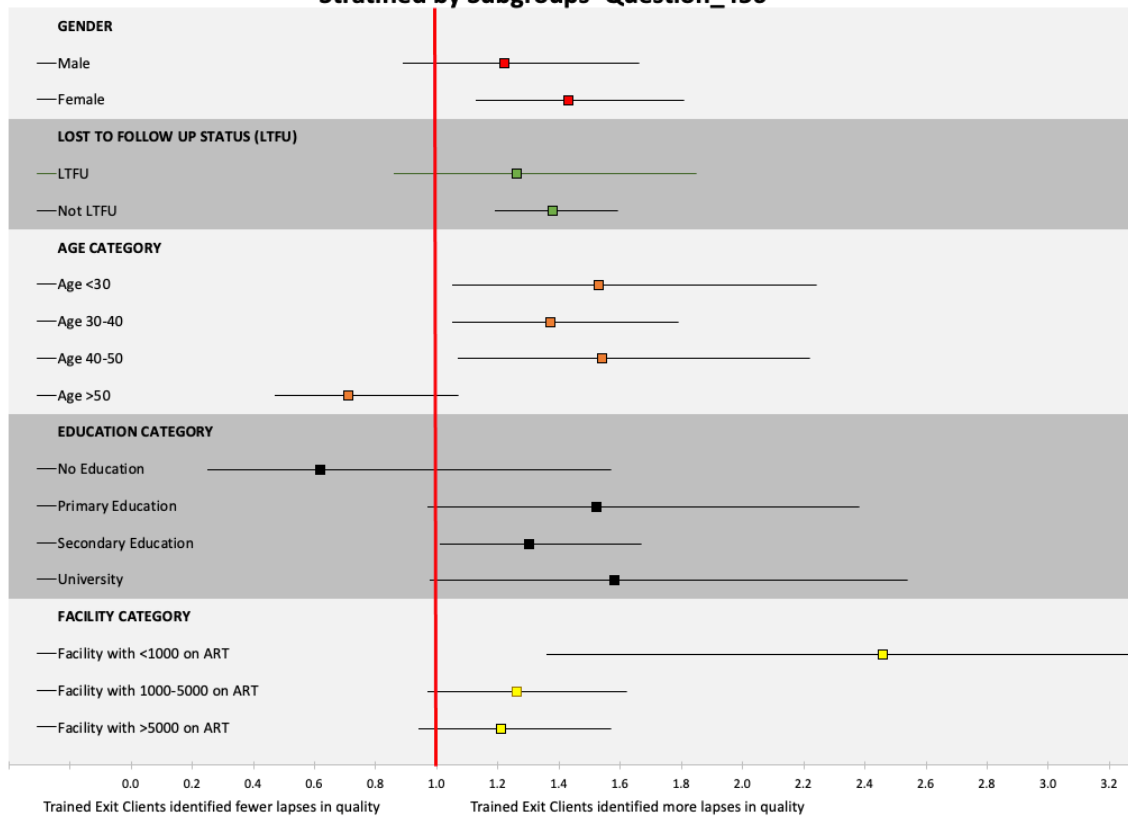

view only

**e) Impact of Training on Identifying Care Lapses  
Stratified by Subgroups- Spend time**



view only

### f) Impact of Training on Identifying Care Lapses Stratified by Subgroups- Feel about care



view only



**g) Impact of Training on Identifying Care Lapses  
Stratified by Subgroups- Satisfied**



view only

### h) Impact of Training on Identifying Care Lapses Stratified by Subgroups- Rude



view only

**i) Impact of Training on Identifying Care Lapses  
Stratified by Subgroups- Lab results**



view only

1  
2  
3  
4  
5  
6  
7  
8  
9  
10  
11  
12  
13  
14  
15  
16  
17  
18  
19  
20  
21  
22  
23  
24  
25  
26  
27  
28  
29  
30  
31  
32  
33  
34  
35  
36  
37  
38  
39  
40  
41  
42  
43  
44  
45  
46  
47  
48  
49  
50  
51  
52  
53  
54  
55  
56  
57  
58  
59  
60

### j) Impact of Training on Identifying Care Lapses Stratified by Subgroups- Pick up meds



view only

Supplementary Figure 2

**Supplementary Figure 2.** Bubble plot showing Trained Exit Sum Score vs Untrained Exit Sum Score. Each bubble represents a single facilities performance. Each bubble's size indicates the number of patients at each facility with larger bubbles corresponding to larger facilities. The horizontal position notes the Untrained Exit Sum Score for all questions against the facility, and the vertical position notes the Trained Exit sum score at the same facility.



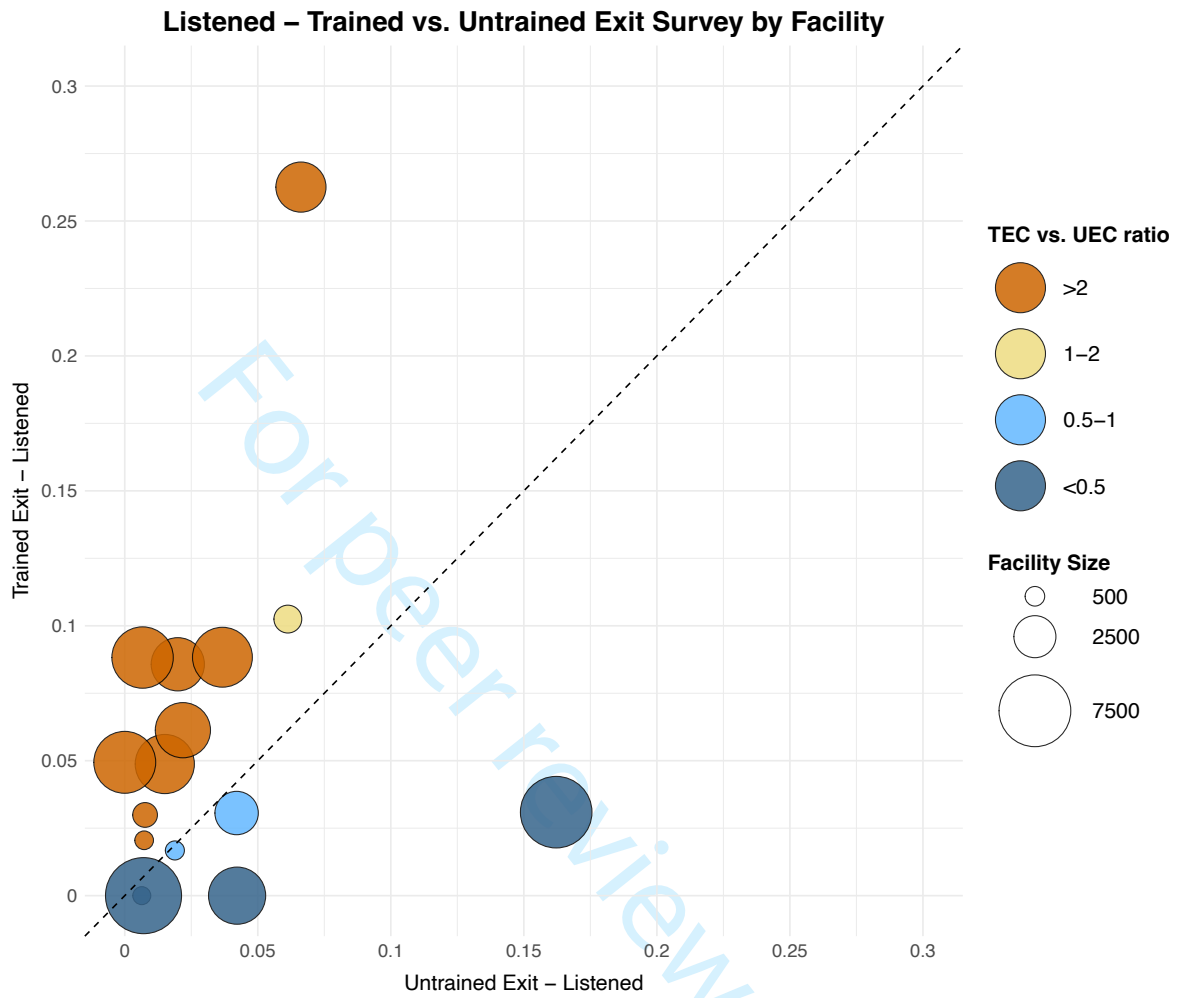

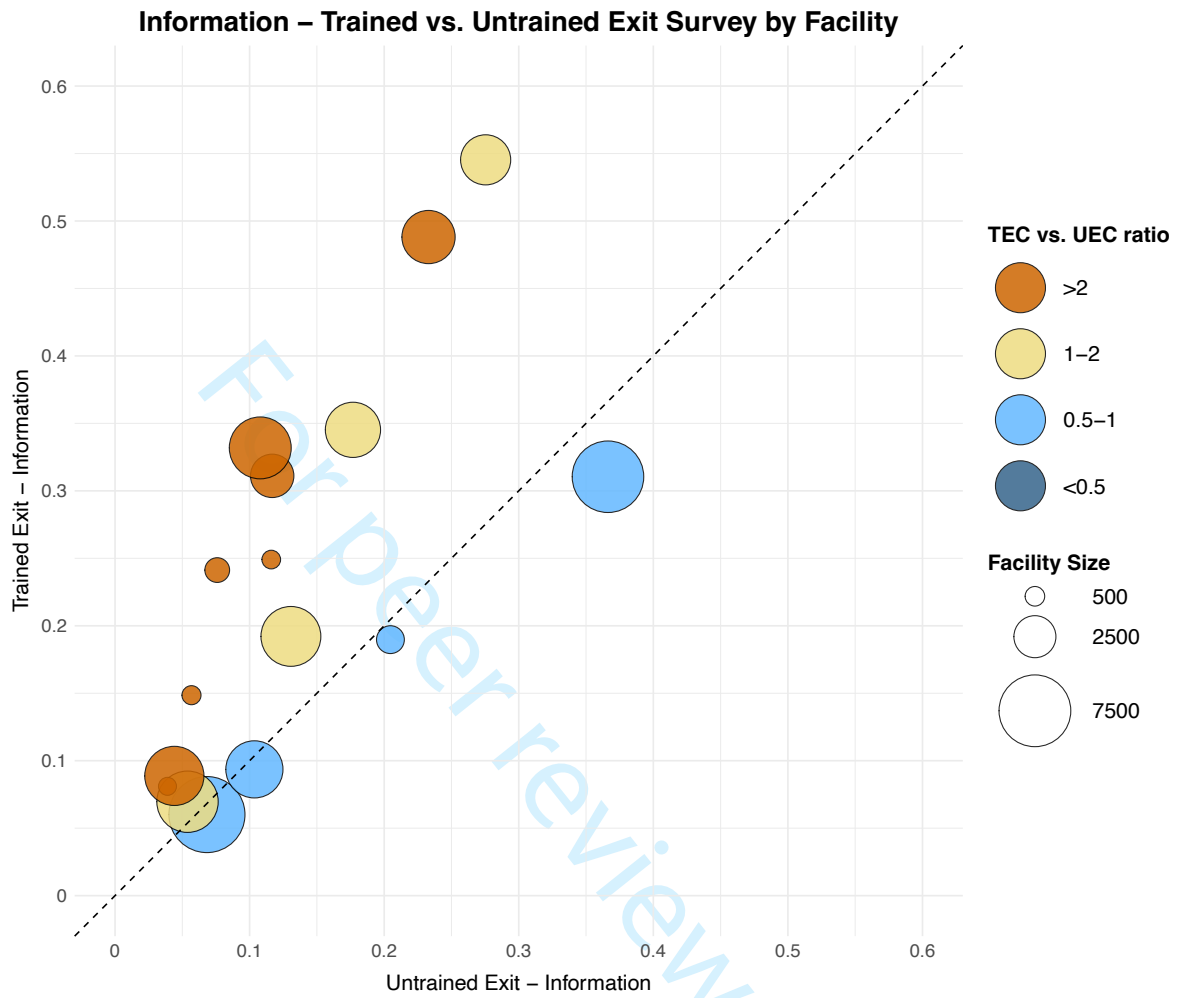

1  
2  
3  
4  
5  
6  
7  
8  
9  
10  
11  
12  
13  
14  
15  
16  
17  
18  
19  
20  
21  
22  
23  
24  
25  
26  
27  
28  
29  
30  
31  
32  
33  
34  
35  
36  
37  
38  
39  
40  
41  
42  
43  
44  
45  
46  
47  
48  
49  
50  
51  
52  
53  
54  
55  
56  
57  
58  
59  
60

1  
2  
3  
4  
5  
6  
7  
8  
9  
10  
11  
12  
13  
14  
15  
16  
17  
18  
19  
20  
21  
22  
23  
24  
25  
26  
27  
28  
29  
30  
31  
32  
33  
34  
35  
36  
37  
38  
39  
40  
41  
42  
43  
44  
45  
46  
47  
48  
49  
50  
51  
52  
53  
54  
55  
56  
57  
58  
59  
60

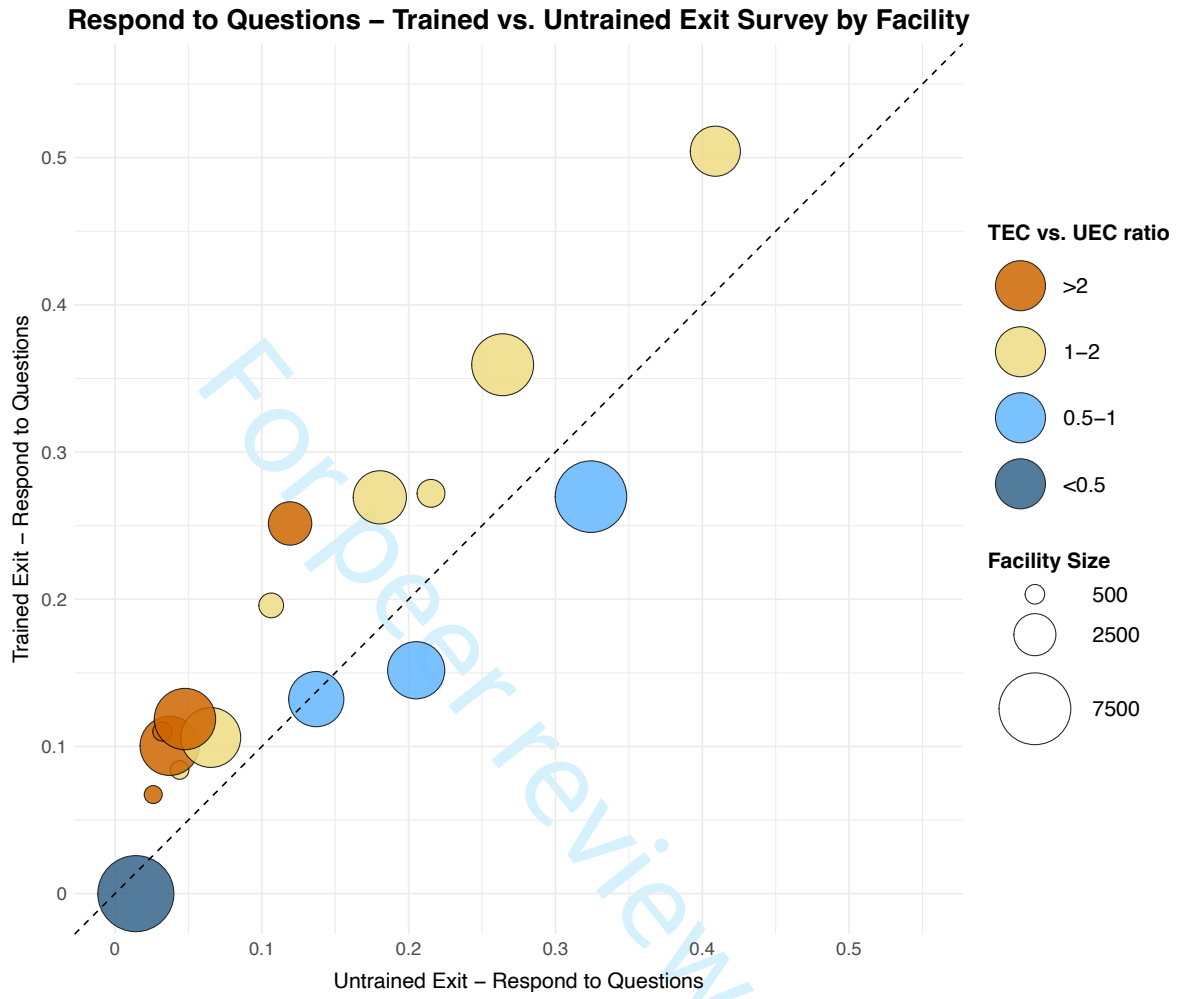





1  
2  
3  
4  
5  
6  
7  
8  
9  
10  
11  
12  
13  
14  
15  
16  
17  
18  
19  
20  
21  
22  
23  
24  
25  
26  
27  
28  
29  
30  
31  
32  
33  
34  
35  
36  
37  
38  
39  
40  
41  
42  
43  
44  
45  
46  
47  
48  
49  
50  
51  
52  
53  
54  
55  
56  
57  
58  
59  
60

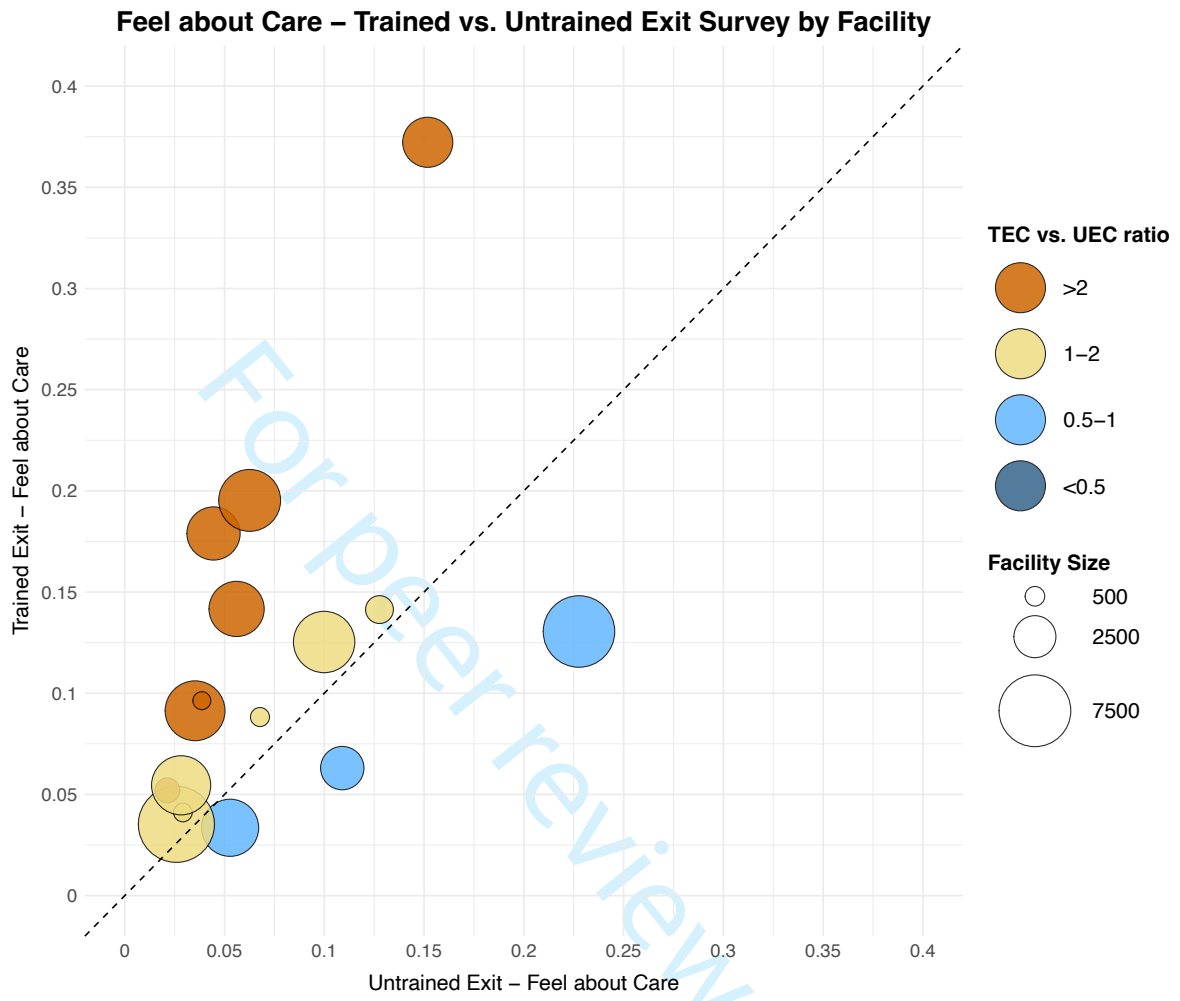

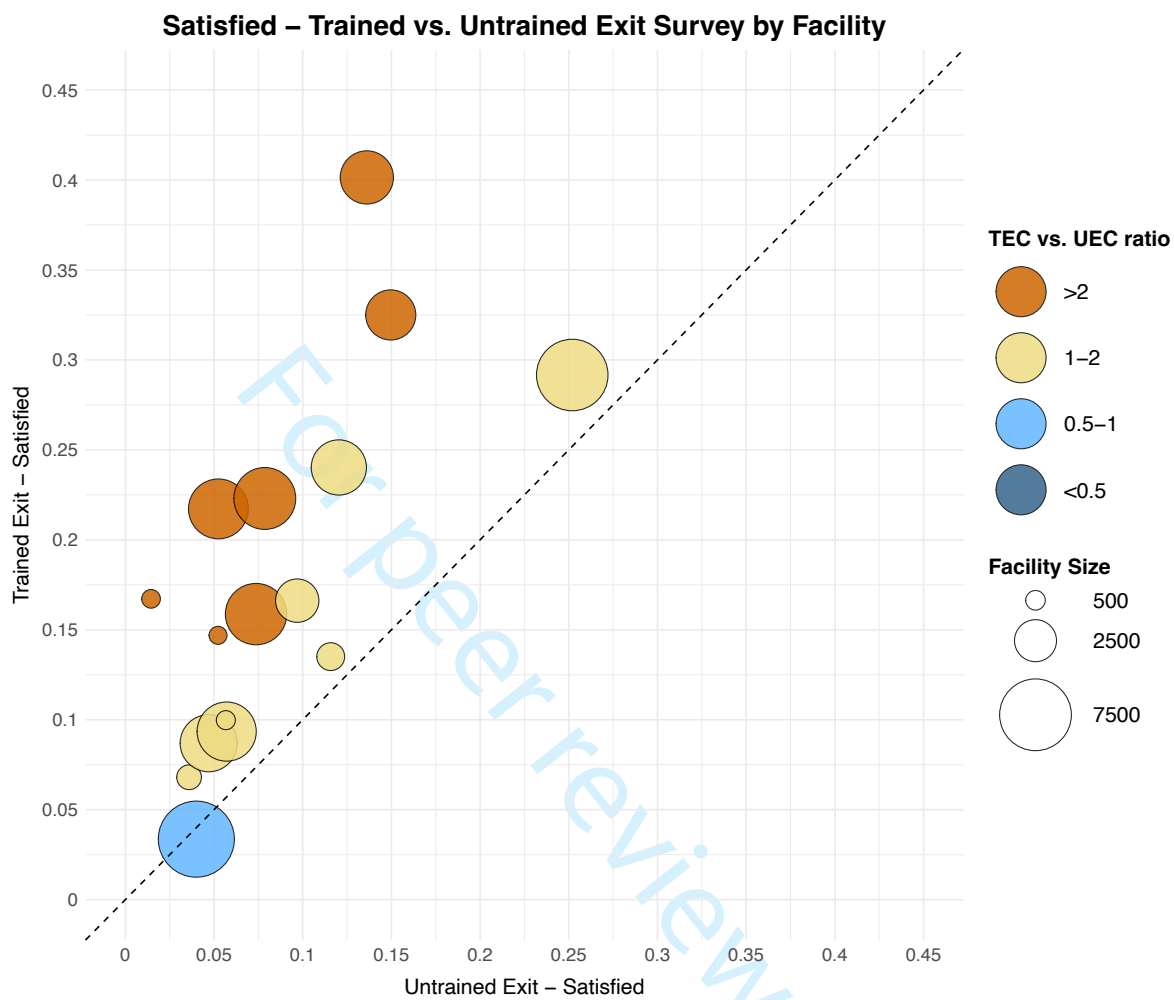

1  
2  
3  
4  
5  
6  
7  
8  
9  
10  
11  
12  
13  
14  
15  
16  
17  
18  
19  
20  
21  
22  
23  
24  
25  
26  
27  
28  
29  
30  
31  
32  
33  
34  
35  
36  
37  
38  
39  
40  
41  
42  
43  
44  
45  
46  
47  
48  
49  
50  
51  
52  
53  
54  
55  
56  
57  
58  
59  
60





## STROBE Statement—checklist of items that should be included in reports of observational studies

|                              | Item No | Recommendation                                                                                                                                                                                                                                                                                                                                                                                                                                                         | Page No |
|------------------------------|---------|------------------------------------------------------------------------------------------------------------------------------------------------------------------------------------------------------------------------------------------------------------------------------------------------------------------------------------------------------------------------------------------------------------------------------------------------------------------------|---------|
| <b>Title and abstract</b>    | 1       | (a) Indicate the study's design with a commonly used term in the title or the abstract                                                                                                                                                                                                                                                                                                                                                                                 | 1       |
|                              |         | (b) Provide in the abstract an informative and balanced summary of what was done and what was found                                                                                                                                                                                                                                                                                                                                                                    | 1       |
| <b>Introduction</b>          |         |                                                                                                                                                                                                                                                                                                                                                                                                                                                                        |         |
| Background/rationale         | 2       | Explain the scientific background and rationale for the investigation being reported                                                                                                                                                                                                                                                                                                                                                                                   | 3,4     |
| Objectives                   | 3       | State specific objectives, including any prespecified hypotheses                                                                                                                                                                                                                                                                                                                                                                                                       | 3       |
| <b>Methods</b>               |         |                                                                                                                                                                                                                                                                                                                                                                                                                                                                        |         |
| Study design                 | 4       | Present key elements of study design early in the paper                                                                                                                                                                                                                                                                                                                                                                                                                | 4,5     |
| Setting                      | 5       | Describe the setting, locations, and relevant dates, including periods of recruitment, exposure, follow-up, and data collection                                                                                                                                                                                                                                                                                                                                        | 5       |
| Participants                 | 6       | (a) <i>Cohort study</i> —Give the eligibility criteria, and the sources and methods of selection of participants. Describe methods of follow-up<br><i>Case-control study</i> —Give the eligibility criteria, and the sources and methods of case ascertainment and control selection. Give the rationale for the choice of cases and controls<br><i>Cross-sectional study</i> —Give the eligibility criteria, and the sources and methods of selection of participants | 5,6     |
|                              |         | (b) <i>Cohort study</i> —For matched studies, give matching criteria and number of exposed and unexposed<br><i>Case-control study</i> —For matched studies, give matching criteria and the number of controls per case                                                                                                                                                                                                                                                 | N/A     |
| Variables                    | 7       | Clearly define all outcomes, exposures, predictors, potential confounders, and effect modifiers. Give diagnostic criteria, if applicable                                                                                                                                                                                                                                                                                                                               | 5,7,8   |
| Data sources/<br>measurement | 8*      | For each variable of interest, give sources of data and details of methods of assessment (measurement). Describe comparability of assessment methods if there is more than one group                                                                                                                                                                                                                                                                                   | 5-7     |
| Bias                         | 9       | Describe any efforts to address potential sources of bias                                                                                                                                                                                                                                                                                                                                                                                                              | 4       |
| Study size                   | 10      | Explain how the study size was arrived at                                                                                                                                                                                                                                                                                                                                                                                                                              | 8       |
| Quantitative variables       | 11      | Explain how quantitative variables were handled in the analyses. If applicable, describe which groupings were chosen and why                                                                                                                                                                                                                                                                                                                                           | 7       |
| Statistical methods          | 12      | (a) Describe all statistical methods, including those used to control for confounding                                                                                                                                                                                                                                                                                                                                                                                  | 7       |
|                              |         | (b) Describe any methods used to examine subgroups and interactions                                                                                                                                                                                                                                                                                                                                                                                                    | 7       |
|                              |         | (c) Explain how missing data were addressed                                                                                                                                                                                                                                                                                                                                                                                                                            | N/A     |
|                              |         | (d) <i>Cohort study</i> —If applicable, explain how loss to follow-up was addressed<br><i>Case-control study</i> —If applicable, explain how matching of cases and controls was addressed<br><i>Cross-sectional study</i> —If applicable, describe analytical methods taking account of sampling strategy                                                                                                                                                              | N/A     |
|                              |         | (e) Describe any sensitivity analyses                                                                                                                                                                                                                                                                                                                                                                                                                                  | N/A     |

Continued on next page

| <b>Results</b>           |     |                                                                                                                                                                                                              |       |
|--------------------------|-----|--------------------------------------------------------------------------------------------------------------------------------------------------------------------------------------------------------------|-------|
| Participants             | 13* | (a) Report numbers of individuals at each stage of study—eg numbers potentially eligible, examined for eligibility, confirmed eligible, included in the study, completing follow-up, and analysed            | 9     |
|                          |     | (b) Give reasons for non-participation at each stage                                                                                                                                                         | 9     |
|                          |     | (c) Consider use of a flow diagram                                                                                                                                                                           | N/A   |
| Descriptive data         | 14* | (a) Give characteristics of study participants (eg demographic, clinical, social) and information on exposures and potential confounders                                                                     | 9, 10 |
|                          |     | (b) Indicate number of participants with missing data for each variable of interest                                                                                                                          | 9,10  |
|                          |     | (c) <i>Cohort study</i> —Summarise follow-up time (eg, average and total amount)                                                                                                                             | N/A   |
| Outcome data             | 15* | <i>Cohort study</i> —Report numbers of outcome events or summary measures over time                                                                                                                          | N/A   |
|                          |     | <i>Case-control study</i> —Report numbers in each exposure category, or summary measures of exposure                                                                                                         | N/A   |
|                          |     | <i>Cross-sectional study</i> —Report numbers of outcome events or summary measures                                                                                                                           | 10    |
| Main results             | 16  | (a) Give unadjusted estimates and, if applicable, confounder-adjusted estimates and their precision (eg, 95% confidence interval). Make clear which confounders were adjusted for and why they were included | 7,11  |
|                          |     | (b) Report category boundaries when continuous variables were categorized                                                                                                                                    |       |
|                          |     | (c) If relevant, consider translating estimates of relative risk into absolute risk for a meaningful time period                                                                                             |       |
| Other analyses           | 17  | Report other analyses done—eg analyses of subgroups and interactions, and sensitivity analyses                                                                                                               | 12,14 |
| <b>Discussion</b>        |     |                                                                                                                                                                                                              |       |
| Key results              | 18  | Summarise key results with reference to study objectives                                                                                                                                                     | 14,15 |
| Limitations              | 19  | Discuss limitations of the study, taking into account sources of potential bias or imprecision. Discuss both direction and magnitude of any potential bias                                                   | 18    |
| Interpretation           | 20  | Give a cautious overall interpretation of results considering objectives, limitations, multiplicity of analyses, results from similar studies, and other relevant evidence                                   | 19,20 |
| Generalisability         | 21  | Discuss the generalisability (external validity) of the study results                                                                                                                                        | 18    |
| <b>Other information</b> |     |                                                                                                                                                                                                              |       |
| Funding                  | 22  | Give the source of funding and the role of the funders for the present study and, if applicable, for the original study on which the present article is based                                                | 20    |

\*Give information separately for cases and controls in case-control studies and, if applicable, for exposed and unexposed groups in cohort and cross-sectional studies.

**Note:** An Explanation and Elaboration article discusses each checklist item and gives methodological background and published examples of transparent reporting. The STROBE checklist is best used in conjunction with this article (freely available on the Web sites of PLoS Medicine at <http://www.plosmedicine.org/>, Annals of Internal Medicine at <http://www.annals.org/>, and Epidemiology at <http://www.epidem.com/>). Information on the STROBE Initiative is available at [www.strobe-statement.org](http://www.strobe-statement.org).

# BMJ Open

## A Comparison of Patient Exit Interviews to Unannounced Standardised Patients for Assessing HIV Service Delivery in Zambia nested within a Cluster Randomised Trial

|                               |                                                                                                                                                                                                                                                                                                                                                                                                                                                                                                                                                                                                                                                                                                                                                                                                                                                                                                                                                                                                                                                                                                                                                                                                                                                                                                                                                                                                                                                                                                                                                                                                                                                                                                                                                                                                                                                                                                                                                                                                                                                                                                                                                                                                        |
|-------------------------------|--------------------------------------------------------------------------------------------------------------------------------------------------------------------------------------------------------------------------------------------------------------------------------------------------------------------------------------------------------------------------------------------------------------------------------------------------------------------------------------------------------------------------------------------------------------------------------------------------------------------------------------------------------------------------------------------------------------------------------------------------------------------------------------------------------------------------------------------------------------------------------------------------------------------------------------------------------------------------------------------------------------------------------------------------------------------------------------------------------------------------------------------------------------------------------------------------------------------------------------------------------------------------------------------------------------------------------------------------------------------------------------------------------------------------------------------------------------------------------------------------------------------------------------------------------------------------------------------------------------------------------------------------------------------------------------------------------------------------------------------------------------------------------------------------------------------------------------------------------------------------------------------------------------------------------------------------------------------------------------------------------------------------------------------------------------------------------------------------------------------------------------------------------------------------------------------------------|
| Journal:                      | <i>BMJ Open</i>                                                                                                                                                                                                                                                                                                                                                                                                                                                                                                                                                                                                                                                                                                                                                                                                                                                                                                                                                                                                                                                                                                                                                                                                                                                                                                                                                                                                                                                                                                                                                                                                                                                                                                                                                                                                                                                                                                                                                                                                                                                                                                                                                                                        |
| Manuscript ID                 | bmjopen-2022-069086.R2                                                                                                                                                                                                                                                                                                                                                                                                                                                                                                                                                                                                                                                                                                                                                                                                                                                                                                                                                                                                                                                                                                                                                                                                                                                                                                                                                                                                                                                                                                                                                                                                                                                                                                                                                                                                                                                                                                                                                                                                                                                                                                                                                                                 |
| Article Type:                 | Original research                                                                                                                                                                                                                                                                                                                                                                                                                                                                                                                                                                                                                                                                                                                                                                                                                                                                                                                                                                                                                                                                                                                                                                                                                                                                                                                                                                                                                                                                                                                                                                                                                                                                                                                                                                                                                                                                                                                                                                                                                                                                                                                                                                                      |
| Date Submitted by the Author: | 19-Jun-2023                                                                                                                                                                                                                                                                                                                                                                                                                                                                                                                                                                                                                                                                                                                                                                                                                                                                                                                                                                                                                                                                                                                                                                                                                                                                                                                                                                                                                                                                                                                                                                                                                                                                                                                                                                                                                                                                                                                                                                                                                                                                                                                                                                                            |
| Complete List of Authors:     | <p>Sikombe, Kombatende; Center for Infectious Disease Research in Zambia, Implementation Science Unit; London School of Hygiene and Tropical Medicine Faculty of Public Health and Policy, Department of Public Health, Environments and Society</p> <p>Pry, Jake; Center for Infectious Disease Research in Zambia, Implementation Science Unit</p> <p>Mody, Aaloke; Washington University in St Louis School of Medicine, Internal Medicine</p> <p>Rice, Brian ; London School of Hygiene and Tropical Medicine Faculty of Public Health and Policy, Department of Public Health, Environments and Society</p> <p>Bukankala, Chama; Center for Infectious Disease Research in Zambia, Research</p> <p>Eshun-Wilson, Ingrid ; Washington University in St Louis School of Medicine, Internal Medicine</p> <p>Mutale, Jacob; Center for Infectious Disease Research in Zambia, Implementation Science Unit</p> <p>Simbeza, Sandra; Center for Infectious Disease Research in Zambia, Implementation Science Unit</p> <p>Beres, Laura K ; Johns Hopkins University Bloomberg School of Public Health, Department of International Health</p> <p>Mukamba, Njekwa; Center for Infectious Disease Research in Zambia, Social and Behavioural Science Research Group</p> <p>Mukumbwa-Mwenechanya, Mpande; Center for Infectious Disease Research in Zambia, Implementation Science Unit</p> <p>Mwamba, Daniel; Center for Infectious Disease Research in Zambia, Clinical Care Services</p> <p>Sharma, Anjali; Center for Infectious Disease Research in Zambia, Social and Behavioural Science Research Group</p> <p>Wringe, Alison; London School of Hygiene and Tropical Medicine Faculty of Epidemiology and Population Health</p> <p>Hargreaves, James; London School of Hygiene and Tropical Medicine Faculty of Public Health and Policy, Department of Public Health, Environments and Society</p> <p>Bolton-Moore, Carolyn; Center for Infectious Disease Research in Zambia, Clinical Care Services ; The University of Alabama at Birmingham Department of Medicine, Infectious Disease</p> <p>Holmes, Charles; Georgetown University Medical Center, Center for Innovation in Global Health</p> |



|                                  |                                                                                                                                                                                                                                           |
|----------------------------------|-------------------------------------------------------------------------------------------------------------------------------------------------------------------------------------------------------------------------------------------|
|                                  | Sikazwe, Izukanji; Center for Infectious Disease Research in Zambia, Implementation Science Unit<br>Geng, Elvin; Washington University in St Louis School of Medicine, Internal Medicine                                                  |
| <b>Primary Subject Heading</b> : | Health services research                                                                                                                                                                                                                  |
| Secondary Subject Heading:       | Epidemiology, Global health, Health services research, HIV/AIDS, Patient-centred medicine                                                                                                                                                 |
| Keywords:                        | Public health < INFECTIOUS DISEASES, Organisation of health services < HEALTH SERVICES ADMINISTRATION & MANAGEMENT, Quality in health care < HEALTH SERVICES ADMINISTRATION & MANAGEMENT, HIV & AIDS < INFECTIOUS DISEASES, PUBLIC HEALTH |
|                                  |                                                                                                                                                                                                                                           |

SCHOLARONE™  
Manuscripts



I, the Submitting Author has the right to grant and does grant on behalf of all authors of the Work (as defined in the below author licence), an exclusive licence and/or a non-exclusive licence for contributions from authors who are: i) UK Crown employees; ii) where BMJ has agreed a CC-BY licence shall apply, and/or iii) in accordance with the terms applicable for US Federal Government officers or employees acting as part of their official duties; on a worldwide, perpetual, irrevocable, royalty-free basis to BMJ Publishing Group Ltd ("BMJ") its licensees and where the relevant Journal is co-owned by BMJ to the co-owners of the Journal, to publish the Work in this journal and any other BMJ products and to exploit all rights, as set out in our [licence](#).

The Submitting Author accepts and understands that any supply made under these terms is made by BMJ to the Submitting Author unless you are acting as an employee on behalf of your employer or a postgraduate student of an affiliated institution which is paying any applicable article publishing charge ("APC") for Open Access articles. Where the Submitting Author wishes to make the Work available on an Open Access basis (and intends to pay the relevant APC), the terms of reuse of such Open Access shall be governed by a Creative Commons licence – details of these licences and which [Creative Commons](#) licence will apply to this Work are set out in our licence referred to above.

Other than as permitted in any relevant BMJ Author's Self Archiving Policies, I confirm this Work has not been accepted for publication elsewhere, is not being considered for publication elsewhere and does not duplicate material already published. I confirm all authors consent to publication of this Work and authorise the granting of this licence.

# A Comparison of Patient Exit Interviews to Unannounced Standardised Patients for Assessing HIV Service Delivery in Zambia nested within a Cluster Randomised Trial

Kombatende Sikombe<sup>1,2</sup>, Jake M Pry<sup>1,3</sup>, Aaloke Mody<sup>4</sup>, Brian Rice, Chama Bukankala<sup>1</sup>, Ingrid Eshun-Wilson<sup>4</sup>, Jacob Mutale<sup>1</sup>, Sandra Simbeza<sup>1</sup>, Laura K Beres<sup>5</sup>, Njekwa Mukamba<sup>1</sup>, Mpande Mukumbwa-Mwenechanya<sup>1</sup>, Daniel Mwamba<sup>1</sup>, Anjali Sharma<sup>1</sup>, Alison Wringe<sup>6</sup>, James Hargreaves<sup>1</sup>, Carolyn Bolton Moore<sup>1,7</sup>, Charles B Holmes<sup>8</sup>, Izukanji Sikazwe<sup>1</sup>, Elvin Geng<sup>4</sup>

<sup>1</sup>Centre for Infectious Disease Research in Zambia, Lusaka, Zambia, <sup>2</sup>Faculty of Public Health and Policy, London School of Hygiene & Tropical Medicine, London, UK, <sup>3</sup>Department of Public Health Sciences, University of California, Davis, CA, USA, <sup>4</sup>Division of Infectious Diseases, Washington University in St Louis, St. Louis, MO, USA, <sup>5</sup>Department of International Health, Johns Hopkins Bloomberg School of Public Health, Baltimore, MD, USA, <sup>6</sup>Faculty of Epidemiology and Population Health, London School of Hygiene and Tropical Medicine, London, UK, <sup>7</sup>Department of Medicine, School of Medicine, University of Alabama at Birmingham, Birmingham, AL, USA, <sup>8</sup>Center for Innovation in Global Health, Georgetown University, Washington, DC, USA.

Corresponding Author: Kombatende Sikombe

Affiliations: Centre for Infectious Disease Research in Zambia, Lusaka, Zambia, Faculty of Public Health and Policy, London School of Hygiene & Tropical Medicine, London, UK

Email Address: [kombatende.sikombe@cidrz.org](mailto:kombatende.sikombe@cidrz.org) [kombatende.sikombe@lshtm.ac.uk](mailto:kombatende.sikombe@lshtm.ac.uk)

## ABSTRACT

**Objectives:** To compare unannounced standardised patient approach (e.g., mystery clients) to typical exit interviews for assessing patient experiences in Human Immunodeficiency Virus (HIV) care (e.g., unfriendly providers, long-waiting times). We hypothesize standardized patients would report more negative experiences than typical exit interviews affected by social desirability bias.

**Setting:** Cross-sectional surveys in 16 government-operated HIV primary care clinics in Lusaka, Zambia providing antiretroviral-therapy (ART).

**Participants:** 3526 participants aged  $\geq 18$  years receiving ART participated in the exit surveys between August 2019 and November 2021.

**Intervention:** Systematic sample (every  $k^{\text{th}}$  file) of patients in clinic waiting area willing to be trained received pre-visit training and post-visit interviews. Providers were unaware of trained patients.

**Outcome measures:** We compared patient experience among patients that received a brief training prior to their care visit (explaining each patient experience construct in the exit survey, being anonymous, without manipulating behaviour) with those who did not undergo training on the survey prior to their visit.

**Results:** Among 3526 participants who participated in exit surveys, 2415 were untrained (56% female, median age 40 (inter quartile range [IQR]:32-47)) and 1111 were trained (50% female, median age 37 (IQR:31-45)). Compared to untrained, trained patients were more likely to report a negative care experience overall (adjusted Prevalence Ratio aPR for aggregate sum score: 1.64 [95% CI:1.39-1.94]), with a greater proportion reporting feeling unwelcomed by providers ([aPR]: 1.71 [95% CI:1.20-2.44]) and witnessing providers behaving rude (aPR: 2.28 [95% CI:1.63-3.19]).

**Conclusion:** Trained patients were more likely to identify sub-optimal care. They may have understood the items solicited better or felt empowered to be more critical., We trained existing patients, unlike studies that use “standardised patients” drawn from outside the patient population. This low-cost strategy could improve patient-centred service delivery elsewhere.

**Trial registration:** Assessment was nested within a parent study. [www.pactr.org](http://www.pactr.org) registered the parent study (PACTR202101847907585).

## STRENGTHS AND LIMITATIONS OF THIS STUDY

- This study utilised standardised patients (SP) to assess chronic care in which actual, rather than simulated patients were trained before their upcoming clinic visits.
- Traditional SP techniques require a trained simulated patient to visit multiple clinics, a strategy more appropriate for episodic care.
- Modified SP approaches can address the challenge of integrating patient experience into routine public health, a crucial quality indicator for governments and funders.
- We trained patients to assess care quality (e.g., waiting times, rude providers), and compared their responses to traditional untrained exit surveys in 16 facilities in Zambia.
- Training remains challenging as we did not include participants who were illiterate, had poor recall ability, or potentially struggled with comprehension.

## BACKGROUND

1  
2  
3 137  
4  
5  
6 138 Because of improved testing, linkage, and treatment to meet the global 95-95-95 treatment  
7  
8 139 targets (95% of HIV-positive patients know their status, 95% are on treatment, and 95% have  
9  
10 140 suppressed viral loads) [1], retention in care have become a major obstacle to improving Human  
11  
12 141 Immunodeficiency Virus (HIV) treatment outcomes, and health systems in low-income settings like  
13  
14  
15 142 Zambia, have sought to shift their public health response by designing and delivering high quality  
16  
17 143 and patient-centred HIV care [2–7]. Efforts to improve service quality and patient experience require  
18  
19 144 systematic measurement of the patient experience to guide facility responses as poor patient  
20  
21  
22 145 experience has been shown to lead to disengagement from care [8–12]. Health policymakers and  
23  
24 146 donors, such as the President's Emergency Plan for AIDS Relief (PEPFAR), have invested in clinical  
25  
26 147 metrics to assess care quality in Zambia and the wider region, but to a lesser extent in non-clinical  
27  
28  
29 148 metrics like patient experience [13]. These metrics can be critical for guiding efforts to improve  
30  
31 149 retention in care by ensuring an informed response to improving quality of care and patient  
32  
33 150 centredness.

34  
35  
36  
37 151 Accurate and pragmatic measurement of the patient experience poses a range of challenges.  
38  
39 152 Patient experience exit surveys are prone to social desirability bias because of power dynamics in  
40  
41 153 health care. Empirical studies of satisfaction, for example, are widely believed to over-estimate  
42  
43  
44 154 patient satisfaction [14]. This may be particularly true where provider-patient relationships are  
45  
46 155 traditional and hierarchical. Delaying surveys for some time after the encounter is theorised to  
47  
48 156 ameliorate social desirability bias, but in turn may exacerbate bias due to simple inability to  
49  
50  
51 157 remember — thus creating recall bias [7,15]. Other methods such as direct clinical observations of  
52  
53 158 care pose practical difficulties [14,16]. For example, direct observations may be intrusive and  
54  
55 159 therefore may not reflect everyday functionality of a health facility. Care provided under direct  
56  
57  
58  
59  
60

1  
2  
3 160 observations may be of higher quality as behaviour may be influenced by observation, a  
4  
5 161 phenomenon often known as the “Hawthorne effect” [14,16].  
6  
7  
8

9 162 Standardised patients (SP), also known as “mystery clients” or “simulated patients” have  
10  
11 163 largely been used to assess quality of care in developed countries, as well as in assessing customer  
12  
13 164 service in the retail industry[17]. SP can be resource-intensive and require training, but reduce  
14  
15  
16 165 potential for recall bias, social desirability, bias, and Hawthorne effects, providing an opportunity  
17  
18 166 for optimal assessment of patient satisfaction among people receiving HIV care [7,15,18]. They  
19  
20 167 have largely been used for episodic care where a highly skilled and well-trained person poses as a  
21  
22  
23 168 client by making one visit to multiple facilities. This approach holds promise for assessing the  
24  
25 169 patient experience in HIV care but poses pragmatic challenges when assessing the quality of chronic  
26  
27 170 care in which a patient makes multiple visits and may compromise efficiency at, already  
28  
29  
30 171 overburdened, facilities [19–24]. In this study, we report on the development and evaluation of a  
31  
32 172 modified SP approach in which we trained real patients (trained exit clients - TEC) to report on  
33  
34 173 certain characteristics of encounters, and rate key components of care such as waiting times,  
35  
36  
37 174 communication, respectfulness of providers, and privacy.  
38  
39

## 40 175 **METHODS**

### 41 42 43 176 **Study design & setting**

44  
45 177 This study seeks to compare two different methods for assessing patient experience: standard  
46  
47  
48 178 exit survey and those reported by patients who had a brief training on the items before the clinical  
49  
50 179 encounter and to whom the clinic was blinded. The assessment was nested within a parent study:  
51  
52 180 the Leveraging Person-Centred Public Health (PCPH) to improve HIV outcomes in Zambia study  
53  
54  
55 181 ([www.pactr.org](http://www.pactr.org) PACTR202101847907585), a Stepped Wedge Cluster Randomised Trial that  
56  
57  
58  
59  
60

1  
2  
3 182 occurred between August 2019 and November 2021. The aim of the overall PCPH study was to  
4  
5  
6 183 assess the impact of introducing health care workers (HCW) to a patient-centred care (PCC)  
7  
8 184 curriculum and mentoring them on PCC principles to improve retention and viral suppression in  
9  
10 185 HIV care. In this nested sub-study, we compared cross sectional surveys of patient experience using  
11  
12 186 two different survey methods: adapted standardised approach (Trained Exit Clients) vs traditional  
13  
14  
15 187 exit surveys.  
16

## 17 188 18 19 189 **Population**

20  
21  
22 190 The sub-study reported here included 16 health facilities in Lusaka, Zambia, operated by the  
23  
24 191 Ministry of Health (MOH) and receiving technical assistance from the Centre for Infectious  
25  
26 192 Diseases Research in Zambia (CIDRZ) - a Zambian non-governmental organisation (NGO) as well  
27  
28 193 as a part of the larger parent study. We surveyed adults aged 18 years and over who were accessing  
29  
30  
31 194 antiretroviral therapy (ART) at study facilities. Exit survey patients were selected in a systematic  
32  
33 195 sample (every  $k^{\text{th}}$  file varied by facility size) at the time of exit from the clinic. Trained patients were  
34  
35 196 recruited in the waiting room for their visit, underwent a brief training, and then answered survey  
36  
37  
38 197 questions on exit from their encounter. Participants attending an HIV care visit on the day, able to  
39  
40 198 recall events and comprehend study participant recruitment details (as assessed using the  
41  
42 199 comprehension assessment tool) and able to read and write (assessed using literacy tool) were  
43  
44  
45 200 eligible for inclusion.  
46

## 47 201 48 49 202 **Procedures and Measurements**

### 50 51 203 *Survey Instrument*

52  
53  
54 204 For both survey methods, we developed a patient experience instrument based on a previously  
55  
56 205 validated tool developed and used in Kenya: The Wachira Physician-Patient Communication  
57  
58  
59



1  
2  
3 206 Behaviours Scale [25–27]. This survey assessed elements of patient experience including how they  
4  
5 207 were greeted, communicated to, and overall experience. We included additional questions to capture  
6  
7  
8 208 for example, patient reports of witnessing rude behaviour, receiving appropriate medications and  
9  
10 209 availability of lab results. Prior to use in this study, we performed cognitive interviews among  
11  
12 210 twenty participants to assess consistency in understanding questions in English, Bemba and Nyanja.  
13  
14  
15 211 Surveys were forward and back translated to ensure consistency across the three languages. The  
16  
17 212 survey tools for trained and untrained clients were identical. Research assistants were trained by the  
18  
19 213 first author in recruitment, training and administering of the TEC and UEC survey in all 16 facilities.  
20  
21 214 The provincial and district health management teams were informed about the unannounced TEC  
22  
23  
24 215 survey as well as the UEC survey. The study team sensitised all facility staff at the start of the study,  
25  
26 216 but HCWs were not aware of who specific TECs were.  
27  
28  
29 217

### 30 31 218 Procedures for Trained and Untrained Exit Clients

32  
33 219 Efforts to “standardise” assessment of the quality and nature of care in HIV care differs from  
34  
35 220 most previously standardised patient or mystery client work in that HIV care is longitudinal as  
36  
37  
38 221 opposed to episodic or acute care. Under these circumstances, the more conventional standardised  
39  
40 222 patient where a single trained actor can present to multiple different care facilities as a simulated  
41  
42 223 patient with a defined set of symptoms or complaints to assess a single episode of care is not feasible.  
43  
44  
45 224 For example, a patient would have to either register as a new patient or have a false “file” introduced  
46  
47 225 into the paper and electronic medical records — which was deemed infeasible and undesirable.  
48

49 226 Instead of simulated patients, we recruited existing patients already receiving care at a particular  
50  
51 227 facility and then subsequently trained them on the concepts of quality of care according to the MOH  
52  
53  
54 228 manual on Quality Improvement for HCWs in Zambia. To avoid disclosing their trained status,  
55  
56  
57  
58  
59  
60

1  
2  
3 229 patients were recruited on the day of their visit prior to them entering the triage area (i.e., the first  
4  
5 230 point of contact with HCWs). Those who consented underwent a single one-on-one training session  
6  
7  
8 231 for 40 to 60 minutes where they were sensitised to the study instrument (which was the same for  
9  
10 232 both TEC and untrained exit clients (UEC)), the MOH care standards, and strategies on being natural  
11  
12 233 yet observant during their clinic visit for that day according to the standard SP approach. These  
13  
14  
15 234 procedures were meant to ensure patients had a clear and uniform understanding on what they should  
16  
17 235 expect during a high-quality patient visit and were attentive to these critical aspects relative to these  
18  
19 236 standards. Immediately after this training, the TEC presented themselves to their facility and  
20  
21  
22 237 completed their visit as they normally would. After their clinic encounter, participants then  
23  
24 238 completed the exit survey in a private area.

25  
26 239 For the untrained exit surveys, we took a systematic (every  $k^{th}$ , varied by facility size) sample  
27  
28  
29 240 among the patients leaving the facility after attending the clinic on the survey day. Patients were  
30  
31 241 approached by study staff after the visit using a recruitment script to determine their eligibility and  
32  
33 242 were administered the survey after granting consent in a private area.

34  
35 243 For both trained and untrained clients, all interviews and surveys were conducted in either  
36  
37  
38 244 English, Bemba or Nyanja depending on the participant's preference. Given the extra time  
39  
40 245 commitments required for the training, TEC participants were given K100 (~\$5) for the time spent  
41  
42 246 during training as well as a light snack during the survey administration.

## 46 47 248 **Statistical Analysis**

48  
49 249 To assess the association between training and response for each question, we conducted  
50  
51  
52 250 unadjusted and adjusted Poisson regression for each question separately [28]. We then assessed the  
53  
54 251 overall association between training and total sum score. We used descriptive statistics to

1  
2  
3 252 characterise patient characteristics and report survey responses. In these analyses, most of the survey  
4  
5  
6 253 responses were reverse coded to identify when respondents reported a negative experience. Results  
7  
8 254 for individual questions (binary response) represent prevalence ratios for reporting a lapse in care.  
9  
10 255 To assess the sum score (count data) we used Poisson regression, estimating the rate ratio for  
11  
12 256 reporting lapses in care. All models were adjusted, given potential differences in survey participants  
13  
14  
15 257 related to different recruitment strategies using mixed-effects regression, adjusted for age, sex,  
16  
17 258 education, care status at the time (i.e., continuously retained in care versus returning to care after  
18  
19 259 disengagement/ lost to follow up [LTFU]), secular time (using cubic splines), allowing random  
20  
21  
22 260 effects at the facility level. We present these results for the overall population as well as stratified  
23  
24 261 by different pre-defined patient subgroups. Lastly, we used bubble plots to compare summary  
25  
26 262 assessments of the patient experience at the facility-level using TECs versus UECs. All analyses  
27  
28  
29 263 were performed using STATA 14MP (StataCorp, College Station, TX, USA). This sub-study  
30  
31 264 represents a secondary analysis and no formal power calculations were performed for this outcome.  
32  
33 265

### 35 266 **Statement of Ethics Approval**

36 267  
37 267  
38 268 Ethics approval to conduct this research was granted by the Zambian Ministry of Health,  
39  
40 269 National Health Research Authority, and the institutional review boards of the University of Zambia  
41  
42 270 (008-03-19), the University of Alabama at Birmingham (300003282) and the London School of  
43  
44  
45 271 Hygiene and Tropical Medicine (21384).  
46

### 47 272 48 49 273 **Patient and Public Involvement**

50 273  
51  
52 274 Survey questions were developed through a cognitive process with recipients of care. Study  
53  
54 275 implementation guidance was conducted as part of routine CIDRZ partnership with the Zambian  
55  
56  
57  
58  
59  
60

1  
2  
3 276 MOH through a Human Centered Design workshop. CIDRZ engages with implementing partners  
4  
5  
6 277 and affected communities in health facilities, including people living with HIV often represented by  
7  
8 278 neighbourhood health representatives. Although patients were not directly involved in the design of  
9  
10 279 the parent study intervention or the analysis presented here, all study activities were guided by a  
11  
12 280 Scientific Advisory Board with representation from the MOH and a representative of recipients of  
13  
14  
15 281 HIV care. Dissemination of study results is ongoing.  
16  
17

## 18 282 RESULTS

### 21 283 Characteristics of health facilities and patients

23 284 We approached 4375 clients (2955 in the untrained and 1420 in the trained), and 3526  
24  
25 participated, of which 2415 (55.2%) completed experience surveys as untrained exit clients (UEC)  
26 285 (56% female, median age was 40 years (interquartile range [IQR]:32-47 years)) and 1111 (32%)  
27  
28 286 completed experience surveys as trained exit clients (TEC) (50% female with a median age 37 years  
29  
30 287 (IQR:31-45 years). Reasons for non-participation included unavailability at the time due to other  
31  
32 288 commitments. Sixteen percent (16%) of UECs and 40% of TECs who had been lost to care and were  
33  
34 289 returning to care on the day of the survey. Education levels differed between UEC and TEC with 47%  
35  
36 290 and 58% reporting completion of secondary level of education, respectively (Table 1). UEC and  
37  
38 291 TEC were similar for HIV enrolment WHO stage with the largest proportion enrolling at WHO  
39  
40 292 stage 1 and similar in terms of marital status.  
41  
42  
43  
44 293  
45  
46 294  
47  
48 295  
49 296

**Table 1. Socio-demographic characteristics of untrained exit and trained exit clients**

| Characteristics   | Level         | Untrained Exit Clients<br>n=2415 (68%) | Trained Exit Clients<br>n=1111 (32%) |
|-------------------|---------------|----------------------------------------|--------------------------------------|
| <b>Sex, n (%)</b> |               |                                        |                                      |
|                   | <b>Female</b> | 1355 (56)                              | 553 (50)                             |
|                   | <b>Male</b>   | 1060 (44)                              | 558 (50)                             |

|                                    |                           |            |            |
|------------------------------------|---------------------------|------------|------------|
| <b>Age, Median (IQR)</b>           |                           | 40 (32-47) | 37 (31-45) |
| <b>Age category, n (%)</b>         |                           |            |            |
|                                    | <b>&lt;30 years</b>       | 453 (19)   | 258 (23)   |
|                                    | <b>30-40 years</b>        | 828 (34)   | 416 (37)   |
|                                    | <b>40-50 years</b>        | 815 (34)   | 304 (27)   |
|                                    | <b>&gt;50 years</b>       | 319 (13)   | 133 (12)   |
| <b>Education category</b>          |                           |            |            |
|                                    | <b>None</b>               | 132 (5)    | 36 (3)     |
|                                    | <b>Primary</b>            | 654 (27)   | 166 (15)   |
|                                    | <b>Secondary</b>          | 1134 (47)  | 645 (58)   |
|                                    | <b>University</b>         | 150 (6)    | 100 (9)    |
|                                    | <b>Missing</b>            | 307 (13)   | 151 (14)   |
| <b>HIV Enrollment Stage</b>        |                           |            |            |
|                                    | <b>WHO Stage 1</b>        | 1173 (49)  | 533 (48)   |
|                                    | <b>WHO Stage 2</b>        | 314 (13)   | 147 (13)   |
|                                    | <b>WHO Stage 3</b>        | 355 (15)   | 162 (15)   |
|                                    | <b>WHO Stage 4</b>        | 27 (1)     | 7 (1)      |
|                                    | <b>Missing</b>            | 546 (23)   | 262 (24)   |
| <b>Care status at survey visit</b> |                           |            |            |
|                                    | <b>In care</b>            | 2038 (84)  | 664 (60)   |
|                                    | <b>Returning to care</b>  | 377 (16)   | 447 (40)   |
| <b>Marital Status</b>              |                           |            |            |
|                                    | <b>Single</b>             | 257 (11)   | 167 (15)   |
|                                    | <b>Married</b>            | 1361 (56)  | 575 (52)   |
|                                    | <b>Divorced</b>           | 248 (10)   | 108 (10)   |
|                                    | <b>Widowed</b>            | 173 (7)    | 81 (7)     |
|                                    | <b>Unknown</b>            | 41 (2)     | 20 (2)     |
|                                    | <b>Missing</b>            | 335 (14)   | 160 (14)   |
| <b>Facility size</b>               |                           |            |            |
|                                    | <b>&lt; 1000 patients</b> | 591 (25)   | 245 (22)   |
|                                    | <b>1000-5000 patients</b> | 897 (37)   | 485 (44)   |
|                                    | <b>&gt; 5000 patients</b> | 927 (38)   | 381 (34)   |

Table 2 shows the absolute responses for TEC and UEC. Although most patients reported a good experience, across the questions between 5% and 25% of patients reported poor experiences in care. For example, when asked if their HIV care provider gave them as much information about their health as they wanted, 13.4% (UEC) vs 24.6% (TEC) of patients reported not being provided with sufficient information about their health. Similarly, between 9.6% vs 18.8% patients reported

that their HIV care provider was not spending the right amount of time with them at their visit, and 6.8% vs 16.4% reported witnessing rude behaviour.

**Table 2. Survey responses by training status**

| Factor                                                                                   | Level               | Untrained Exit Client n (%) | Trained Exit Client n (%) |
|------------------------------------------------------------------------------------------|---------------------|-----------------------------|---------------------------|
| Did your HIV care provider greet you in a way that made you feel comfortable?            | Yes                 | 2249 (93.1)                 | 980 (88.2)                |
|                                                                                          | No                  | 166 (6.9)                   | 131 (11.8)                |
| Did your HIV care provider listen to what you said?                                      | Yes                 | 2328 (96.4)                 | 1039 (93.5)               |
|                                                                                          | No                  | 79 (3.3)                    | 64 (5.8)                  |
|                                                                                          | Refused             | 8 (0.3)                     | 8 (0.7)                   |
| Did your HIV care provider give you as much information about your health as you wanted? | Yes                 | 2092 (86.6)                 | 838 (75.4)                |
|                                                                                          | No                  | 323 (13.4)                  | 273 (24.6)                |
| Did your HIV care provider allow you to ask questions?                                   | Yes                 | 2082 (86.2)                 | 887 (79.8)                |
|                                                                                          | No                  | 326 (13.5)                  | 222 (20)                  |
|                                                                                          | Refused             | 7 (0.3)                     | 2 (0.2)                   |
| Did your HIV care provider spend the right amount of time with you?                      | Yes                 | 2179 (90.2)                 | 900 (81)                  |
|                                                                                          | No                  | 232 (9.6)                   | 209 (18.8)                |
|                                                                                          | Refused             | 4 (0.2)                     | 2 (0.2)                   |
| Overall, how did you feel about the care you received today?                             | Happy               | 2231 (92.4)                 | 983 (88.5)                |
|                                                                                          | Unhappy             | 178 (7.4)                   | 123 (11.1)                |
|                                                                                          | Refused             | 6 (0.2)                     | 5 (0.4)                   |
| Overall, were you satisfied with all your HIV care providers today?                      | Yes                 | 2206 (91.4)                 | 906 (81.5)                |
|                                                                                          | No                  | 208 (8.6)                   | 202 (18.2)                |
|                                                                                          | Refused             | 1 (0.0)                     | 3 (0.3)                   |
| I witnessed HIV care providers behaving rudely during my visit today                     | No                  | 2251 (93.2)                 | 928 (83.5)                |
|                                                                                          | Yes                 | 163 (6.8)                   | 182 (16.4)                |
|                                                                                          | Refused             | 1 (0.0)                     | 1 (0.1)                   |
| Were your lab results lost?                                                              | No                  | 2143 (88.7)                 | 985 (88.7)                |
|                                                                                          | Yes                 | 268 (11.1)                  | 126 (11.3)                |
|                                                                                          | Not picking up      | 4 (0.2)                     | 0 (0)                     |
| Were you able to pick up your medicine today?                                            | Yes                 | 2366 (98.0)                 | 1087 (97.8)               |
|                                                                                          | No                  | 48 (2.0)                    | 24 (2.2)                  |
|                                                                                          | Not Picking Up Meds | 1 (0.0)                     | 0 (0)                     |

**Effects of training on response patterns: sum score and prevalence ratios**

1  
2  
3 310 In adjusted models, TECs overall reported poor experiences in care: 1.64 times as frequently as  
4  
5 UEC respondents (Sum Score Rate Ratio [RR]: 1.64 [95% CI: 1.39-1.94] (Fig 1, Supplementary  
6 311  
7  
8 312 Table S1), and reported an increased prevalence of poor experiences in care quality compared to  
9  
10 313 untrained across almost all questions. For example; among TECs compared to UECs, there was an  
11  
12 314 increased prevalence of reports of not being greeted in a way that made them feel welcome (adjusted  
13  
14 Prevalence Ratio [aPR]: 1.71 [95% CI: 1.20-2.44]), reporting being dissatisfied with all their HIV  
15 315  
16 care providers during their HIV care visit (aPR: 2.06 [95% CI: 1.61-2.63]) and witnessing any  
17 316  
18 providers behaving rudely during their visit (aPR: 2.28 [95% CI: 1.63-3.19]) (Fig 1, Supplementary  
19 317  
20 Table S1).  
21  
22 318  
23  
24 319

### 25 320 **Impact of training across age, sex, and gender to differences in responses**

  
26

27 321 In stratified analysis of the impact of training on the sum score, training was consistently  
28  
29 associated with increased identification of poor experiences in care across all subgroups apart from  
30 322  
31 those aged 50 years or older and those with no education. We also observed that training had a larger  
32 323  
33 impact among females compared to males, those with a primary education only, and among  
34 324  
35 individuals presenting at smaller facilities (Fig 2). We observed similarities in responses on the  
36 325  
37 impact of training on different age categories, sex, care status and different levels of education when  
38  
39 326 we looked at individual questions except for the question on providers spending the right amount of  
40  
41 327 time where we found that females were twice as likely to report lapses with care compared to males  
42  
43 328 (Supplementary Figure 1). Using TECs gave worse assessments of patient experience at the facility-  
44  
45 level regardless of facility size compared to UECs (Fig 3, Supplementary Figure 2).  
46 329  
47  
48 330  
49  
50 331  
51 332  
52  
53 333

## 54 55 56 57 58 59 60 **DISCUSSION**

1  
2  
3 334 Disengaged patients often express a disconnect between their care expectations and the  
4  
5  
6 335 provider's style, hence experience is bound to vary across facilities [8]. This disconnect can lead to  
7  
8 336 dissatisfaction with HIV services which can often lead to patients dropping out of care[8,11,29]. A  
9  
10 337 brief training for patients living with HIV on how to evaluate the quality and experience of routine  
11  
12 338 care changed patient experience reports compared to untrained patients using the same instrument.  
13  
14  
15 339 Patients who underwent a brief training identified more lapses in care across most questions. Women  
16  
17 340 and young people were more likely to report critical responses after training - consistent with the  
18  
19 341 idea that those who feel least empowered underwent the biggest change. Differences were also  
20  
21  
22 342 bigger for questions in which social desirability is likely to operate. For example, larger differences  
23  
24 343 were observed for witnessing rude behaviour, while no differences were observed for more objective  
25  
26 344 questions such as whether lab results were lost.  
27  
28  
29

30 345 Improving HIV health outcomes requires new strategies that minimise methodological biases  
31  
32 346 and includes everyone the patient encounters during their visit, including clinical officers, doctors,  
33  
34 347 nurses, data clerks, and lay HCWs. Our TEC approach could contribute to getting a true reflection  
35  
36  
37 348 of how much value patients place on things such as effective communication, being greeted  
38  
39 349 appropriately, or being treated with care and respect at all these different touch points. Involving  
40  
41 350 patients in their own care and design of health services has been linked to improved HIV care  
42  
43  
44 351 retention and patient outcomes, such as higher viral suppression rates [30–32]. As progress is being  
45  
46 352 made towards UNAIDS 95-95-95 targets, the global HIV sector is constantly reviewing priorities  
47  
48 353 and challenges for optimal engagement in care [33,34]. Patient experience is a key indicator of  
49  
50  
51 354 healthcare quality for meeting the 95-95-95 targets: delivering services patients need, can access,  
52  
53 355 and address wider determinants of poor health. Clinicians and health systems must address HIV  
54  
55 356 patients' needs from diagnosis to death to ensure healthy ageing and viral suppression. Other  
56  
57  
58  
59  
60



1  
2  
3 357 outcomes in Zambia [11,35,36] show that lifelong needs vary by facility, highlighting the  
4  
5 importance of metrics that measure patient experience accurately. We have shown that it is feasible  
6 358  
7  
8 359 to involve patients in assessing the quality of care and this could potentially lead to involvement of  
9  
10 360 patients in the redesign of healthcare services.

11  
12 361 Because HIV care is longitudinal, SP, who are often used to evaluate episodic care, require  
13  
14 highly skilled people to pose as a simulated patient making one visit to multiple clinics, posing  
15 362  
16 practical implementation challenges in our setting[19–24]. Contrary to SP, we evaluated care quality  
17 363  
18 without using simulated patients and administered the survey once among people in long term care.  
19 364  
20 Using real patients instead of simulated ones drawn from outside the true patient population, we  
21 365  
22 would argue, made our TEC approach more applicable and reproducible in clinical settings. We  
23  
24 366 were able to record HCW behaviour in a typical HIV context using this concealment method,  
25  
26 367 potentially reducing the impact of the Hawthorne effect. Our TECs also consistently identified more  
27  
28 368 lapses in care, potentially reducing social desirability bias and ability to identify issues at the facility.  
29  
30  
31 369 Even though training takes time, the increased quality of our measurement allows one to perform  
32  
33 370 fewer surveys. With traditional approaches like exit surveys, one would require a larger sample size,  
34  
35 371 but this does not address bias [37].  
36  
37  
38 372

39  
40 373 Our findings are consistent with a study done in South Africa which found that non-clinical  
41  
42 374 dimensions of care play a bigger role in determining an overall satisfactory experience for  
43  
44 standardised patients when compared to untrained patients[37]. However, our findings may  
45 375  
46 contradict previous suggestions that tailoring support to individuals to build skills and confidence  
47 376  
48 through patient activation can lead to trained/informed patients reporting a better experience than  
49 377  
50 untrained/ uninformed [38]. TECs cared about the following non-clinical aspects of care: rude  
51 378  
52 providers, being satisfied with HIV care providers, and spending enough time with providers. This  
53  
54 379  
55  
56  
57  
58  
59  
60

1  
2  
3 380 finding is consistent with a previous study in Zambia, where patients reported rude HCWs deterring  
4  
5 381 HIV care engagement [8,10,11]. This could mean that studies assessing patient experience with TEC  
6  
7  
8 382 could focus on a few questions to save time and resources. Questions like, "Did you pick up your  
9  
10 383 medicine or lab results at your visit?" may not add much to a TEC survey because they are definitive,  
11  
12 384 and training appears to influence subjective care dimensions.

14  
15 385 Women TECs were generally more critical about the care they received and would likely  
16  
17 386 provide a more accurate reflection of the health system, possibly because they have better health-  
18  
19 387 seeking behaviour than men, which may be strongly influenced by local gender norms and health  
20  
21  
22 388 service structures designed to engage women of reproductive age [39]. There is some consistency  
23  
24 389 with other findings that women may be more interested in their care than men, especially in facilities  
25  
26 390 that provide integrated services for women and their children [9,40]. Despite longer wait times,  
27  
28  
29 391 women were more satisfied with integrated facilities [41]. In addition, middle-aged people between  
30  
31 392 40-50 benefited the most from training. Compared to older people over 50, younger people under  
32  
33 393 30 were less satisfied with the care they received and often felt they were not greeted by a HCW  
34  
35 394 during their visit. This finding is consistent with cultural norms where younger people are less  
36  
37  
38 395 respected[42]. Given the current strategy of targeting young people, who account for most new  
39  
40 396 infections, these findings suggest an important new approach to identifying what young people value  
41  
42 397 most. Education level was among the strongest predictors of patient experience feedback. Well-  
43  
44  
45 398 educated patients were found to have a less critical/better HIV care visit experience compared to  
46  
47 399 participants with lower levels of educational attainment. This difference in care experience report  
48  
49 400 may be associated, at least in part, with the HCW perception of the patient in the facility. Research  
50  
51 401 conducted in Nigeria discovered that people with higher levels of education are frequently given

1  
2  
3 402 better and more considerate treatment by HCW, hence limited by a form of discrimination/  
4  
5 403 socioeconomic status bias [43,44].  
6  
7

8 404 The observed effect of training on patient experience is likely multifaceted potentially  
9  
10 405 stemming from increased attention and recall to the exit survey items which solicited a feeling of  
11  
12 406 empowerment to be more critical of the care received. In future studies, patient activation should be  
13  
14  
15 407 measured as an outcome to see how training changes the patient's engagement with their care over  
16  
17 408 time [38]. Further research is required into why women TECs reported poorer experiences with care  
18  
19 409 than men. Other studies that have used SP to assess medical students' performance showed that  
20  
21  
22 410 women were more critical on certain aspects of care. These studies also recommend matching of  
23  
24 411 SPs to clinicians by sex [45], something we were not able to do given the nature of our study in  
25  
26 412 primary health facilities where we assessed interpersonal communication with HCWs at all levels.  
27  
28  
29 413 Perhaps our findings call for more investigation into the integration of women's services, such as  
30  
31 414 family planning and children's services with HIV care given some studies have shown this can  
32  
33 415 improve patient satisfaction.  
34

### 35 416 **Limitations**

36  
37  
38 417 Our findings should be interpreted with caution due to the following limitations. Because this  
39  
40 418 was the first time such a study was done, we recruited educated participants who were able to read  
41  
42 419 and write, perceived to have good recall ability and were able to comprehend things. Our study was  
43  
44  
45 420 only done in Lusaka province in facilities that were largely urban except for one facility which was  
46  
47 421 peri-urban hence it is hard to generalise these findings. Another limitation in our approach is the  
48  
49 422 one-time cross-sectional nature of our measurements among people in long term HIV care. If more  
50  
51  
52 423 measures were collected from each TEC, we may well see them being activated in a way that results  
53  
54 424 in an improvement in their experience based on the skills they develop to seek better care from  
55  
56  
57  
58  
59  
60

1  
2  
3 425 providers which ultimately would improve their retention in care. Despite its limitations, the TEC  
4  
5  
6 426 method provides valuable information about healthcare quality, even though it is limited to  
7  
8 427 situations where "walk-ins" are permitted. Our approach only focused on real patients accessing  
9  
10 428 care and we did not manipulate any patient files, so it is possible that some TECs were known to the  
11  
12 429 facility as patients accessing chronic care. Our approach does require a trained interviewer to speak  
13  
14  
15 430 with TECs after their visits, but this is not any different to what already exists. In future, it may be  
16  
17 431 worth using the domains in the national HIV guidelines as the gold standard, but we did not do this  
18  
19 432 as our aim was to come up with a low-cost approach that can easily be rolled out. In addition, the  
20  
21  
22 433 concept of patient centred care is still catching on in Zambia. Our TEC approach can be used to  
23  
24 434 further the knowledge in provider attitudes to other relatively new approaches to delivering quality  
25  
26 435 HIV care such as differentiated service delivery (DSD) for stable patients by assessing whether  
27  
28  
29 436 HCWs follow guidelines when offering this [34]. We also see an opportunity to assess provider  
30  
31 437 patient communication of viral load laboratory results by use of a universal script for each TEC to  
32  
33 438 assess if they are communicated to and if unsuppressed but adherent, what procedures followed.

## 34 35 36 37 439 **Conclusion**

38  
39  
40 440 TEC offers pragmatic methods for health systems in low-income countries to assess non-  
41  
42 441 clinical dimensions of care (communication, respect, and autonomy) which are grounded on the  
43  
44  
45 442 concept of health-system responsiveness and could be critical to the transformation of low-quality  
46  
47 443 health systems to high quality ones[46]. Hawthorne effects and social desirability biases may be  
48  
49 444 mitigated using TECs. We were able to capture HCWs behaviour in a normal day to day low middle  
50  
51  
52 445 income setting using similar approaches recommended by King and colleagues that minimise harm  
53  
54 446 to HCWs and SPs [15]. Our findings suggest that TECs provide a more critical appraisal of some

1  
2  
3 447 aspects of the quality of HIV care. It provides new insights in the Zambian context on what patients'  
4  
5  
6 448 value when they interact with the health system. This could be important given the need to reduce  
7  
8 449 loss to follow up among new ART clients who disengage within the first 6 months of treatment due  
9  
10 450 to a bad first encounter with the health system. Our TEC approach could be used to assess  
11  
12 451 reengagement interventions. The fact that TECs had a better understanding of the items solicited or  
13  
14  
15 452 felt empowered to be more critical shows that the training we provided worked. This low-cost  
16  
17 453 method could be reproduced in other routine settings and presents an opportunity to further  
18  
19 454 institutionalise patient centred care by evaluating what happens at the point of contact between the  
20  
21  
22 455 patient, the health facility, and the health provider. The implications are that it provides an  
23  
24 456 opportunity to improve HIV care, meet patients' expectations and can serve as a monitoring tool for  
25  
26 457 healthcare performance. Coupled with the recent approaches to client led monitoring in HIV care,  
27  
28  
29 458 our approach can be used to enhance decision making that considers patients' involvement.  
30  
31 459  
32  
33 460  
34  
35 461  
36  
37  
38 462  
39  
40 463  
41  
42 464  
43  
44  
45 465  
46  
47 466  
48  
49 467  
50  
51  
52 468  
53  
54 469  
55  
56  
57  
58  
59  
60

### **Data Availability Statement**

The Government of Zambia allows data sharing when applicable local conditions are satisfied. In this case, the data from the study will be made available to any interested researchers upon request. The CIDRZ Ethics and Compliance Committee is responsible for approving such requests. To request data access, one must write to the Secretary to the Committee/Head of Research Operations, Mrs. Hope Chinganya ([Hope.Chinganya@cidrz.org](mailto:Hope.Chinganya@cidrz.org)) mentioning the intended use for the data. The Committee will then facilitate review and authorization to release the data as requested. Data requests must include contact information, a research project title, and a description of the intended use.

### **Funding**

This work was supported, in whole or in part, by the Bill & Melinda Gates Foundation [INV-010563]. Under the grant conditions of the Foundation, a Creative Commons Attribution 4.0 Generic License has already been assigned to the Author Accepted Manuscript version that might arise from this submission. This work was also supported by the National Center for Advancing Translational Sciences (grant KL2 TR002346 to Dr Mody) and the National Institute of Allergy and Infectious Diseases (grant K24 AI134413 to Dr Geng). The funders had no role in study design, data collection and analysis, decision to publish, or preparation of the manuscript.

### **Disclaimer**

The contents of this paper are the sole responsibility of the authors and do not necessarily reflect the views of the Bill & Melinda Gates Foundation.

**Competing interest:** Non declared

## Acknowledgements

We would like to thank recipients of care for taking part in this study. We would like to thank the  
Zambian Ministry of Health, the US President's Emergency Plan for AIDS Relief (PEPFAR)  
through the US Centers for Disease Control and Prevention/Zambia (CDC) and the Centre for  
Infectious Disease Research in Zambia for their leadership in ensuring those in HIV care continue  
to receive life-saving HIV treatment. We would also like to thank the healthcare workers who  
continued to faithfully deliver HIV care in the face of the COVID-19 pandemic

## Contributors

KS: guarantor, lead author, conducted all analyses, led data management activities, field  
coordination of activities and designed data collection tools. JMP: field coordination of data, assisted  
with analysis and revising it critically for important intellectual content, designed data collection  
tools. AM: assisted with analysis, framing, and revising it critically for important intellectual content.  
BR: final approval for publication, assisted with framing and revising it critically for important  
intellectual content CB: field coordination of data quality processes and data acquisition IEW:  
drafted statistical analysis plan, assisted with conceptualisation and interpretation of data. JM:  
assisted with data acquisition and cleaning, field coordination of data quality processes. SS: led  
intervention implementation, project administration and data curation. LKB, NM, AS: cognitively  
tested data collection tools, assisted with conceptualization, underlying data processes, and assisted  
with writing and data interpretation. DM, MM-M: advised implementation details. AW, JH: assisted  
with framing and revising it critically for important intellectual content. CBM: lead for underlying  
data processes and assisted with funding acquisition. CBH: funding acquisition, assisted with  
conceptualisation and advised regarding intervention implementation details. IS: funding

1  
2  
3 515 acquisition, assisted with conceptualisation and manuscript writing. EHG: funding acquisition, led  
4  
5  
6 516 conceptualisation and advised on all analyses, final approval for publication.  
7

### 8 517 **Statement of Ethics Approval**

9 518  
10 519 Ethics approval to conduct this research was granted by the Zambian Ministry of Health,  
11  
12 520 National Health Research Authority, and the institutional review boards of the University of Zambia  
13  
14  
15 521 (008-03-19), the University of Alabama at Birmingham (300003282) and the London School of  
16  
17 522 Hygiene and Tropical Medicine (21384).  
18  
19

20 523  
21  
22 524 **Figure 1. Forest plot comparing responses from Trained Exit Clients (TEC) relative to**  
23 525 **Untrained Exit Clients (UEC) on 10 measures of clinic experience.** Points indicate the rate  
24 526 ratio (for sum score) or prevalence ratio (for all others) for identifying a lapse in care in TEC  
25 527 surveys as compared to UEC. The sum score represents the total number of binary responses (yes  
26 528 vs no) across all clients in one group shown as a rate ratio. The red line indicates a rate or  
27 529 prevalence ratio of 1 and values greater than this indicates more lapses in care identified in TECs.  
28 529 Results are based on mixed-effects models adjusted for age, sex, education with a random effect at  
29 530 the facility.  
30 531  
31 532

32 533 **Figure 2. Impact of Training on Identifying Care Lapses Stratified by Subgroups (N=3480).**  
33 534 When all questions were collapsed into a Sum score among TEC, females were more likely to report  
34 535 lapses in care quality than males. We observed some level of interaction for care status, age category,  
35 536 education category and facility size.  
36 536  
37 537

38 538 **Figure 3. Bubble plot showing Trained Exit Sum Score vs Untrained Exit Sum Score.** Each  
39 539 bubble represents a single facility's performance. Each bubble's size indicates the number of patients  
40 540 at each facility with larger bubbles corresponding to larger facilities. The horizontal position notes  
41 541 the Untrained Exit Sum Score for all questions against the facility, and the vertical position notes  
42 542 the Trained Exit sum score at the same facility.  
43 542  
44 543  
45  
46 544  
47  
48 545  
49  
50  
51 546  
52  
53 547  
54  
55 548  
56  
57  
58  
59  
60



## REFERENCES

- 1 UNAIDS JUNP on H-G. *In Danger: UNAIDS Global AIDS Update 2022*. 2022. doi:10.18356/9789210019798
- 2 Institute of Medicine & Committee on Quality of Health Care in America. *Crossing the Quality Chasm: A New Health System for the 21st Century*. 2001. doi:10.1136/bmj.323.7322.1192
- 3 World Health Organization. Maintaining and Improving Quality of Care Within HIV Clinical Services. 2019. <http://apps.who.int/bookorders>. (accessed 11 Mar 2020).
- 4 Edmonds KA, Aspiras OG, Rose JP, *et al*. Cross-sectional evaluation of perceived health care provider engagement, self-efficacy, and ART adherence in people living with HIV/AIDS. *AIDS Care* 2021;**33**:154–8. doi:10.1080/09540121.2019.1703889
- 5 Bakken S, Holzemer WL, Brown MA, *et al*. Relationships between perception of engagement with health care provider and demographic characteristics, health status, and adherence to therapeutic regimen in persons with HIV/AIDS. *AIDS Patient Care STDS* 2000;**14**:189–97. doi:10.1089/108729100317795
- 6 Okoli C, Brough G, Allan B, *et al*. Shared Decision Making Between Patients and Healthcare Providers and its Association with Favorable Health Outcomes Among People Living with HIV. *AIDS Behav* 2021;**25**:1384–95. doi:10.1007/s10461-020-02973-4
- 7 Kwan A, Daniels B, Bergkvist S, *et al*. Use of standardised patients for healthcare quality research in low- and middle-income countries. *BMJ Glob Health* 2019;**4**:e001669. doi:10.1136/bmjgh-2019-001669
- 8 Mwamba C, Sharma A, Mukamba N, *et al*. ‘They care rudely!’: resourcing and relational health system factors that influence retention in care for people living with HIV in Zambia. *BMJ Glob Health* 2018;**3**:e001007. doi:10.1136/bmjgh-2018-001007
- 9 Topp SM, Mwamba C, Sharma A, *et al*. Rethinking retention: Mapping interactions between multiple factors that influence long-term engagement in HIV care. *PLoS One* 2018;**13**:e0193641. <https://doi.org/10.1371/journal.pone.0193641>
- 10 Zanolini A, Sikombe K, Sikazwe I, *et al*. Understanding preferences for HIV care and treatment in Zambia: Evidence from a discrete choice experiment among patients who have been lost to follow-up. *PLoS Med* 2018;**15**:e1002636. doi:10.1371/JOURNAL.PMED.1002636
- 11 Sikazwe I, Eshun-Wilson I, Sikombe K, *et al*. Patient-reported Reasons for Stopping Care or Switching Clinics in Zambia: A Multi-site, Regionally Representative estimate using a multi-stage sampling-based approach in Zambia. *Clinical Infectious Diseases* Published Online First: 2020. doi:10.1093/cid/ciaa1501
- 12 Mody A, Sikombe K, Beres LK, *et al*. Profiles of HIV Care Disruptions Among Adult Patients Lost to Follow-up in Zambia. *JAIDS Journal of Acquired Immune Deficiency Syndromes* 2020;**Publish Ah**. doi:10.1097/qai.0000000000002530
- 13 Porter LE, Bouey PD, Curtis S, *et al*. Beyond indicators: Advances in global HIV monitoring and evaluation during the PEPFAR era. *J Acquir Immune Defic Syndr (1988)* 2012;**60**. doi:10.1097/QAI.0b013e31825cf345
- 14 MILLER FRANCO L, FRANCO C, KUMWENDA N, *et al*. Methods for assessing quality of provider performance in developing countries. *International Journal for Quality in Health Care* 2002;**14**:17–24. doi:10.1093/intqhc/14.suppl\_1.17
- 15 King JJC, Das J, Kwan A, *et al*. How to do (or not to do) ... using the standardized patient method to measure clinical quality of care in LMIC health facilities. *Health Policy Plan* 2019;**34**:625–34. doi:10.1093/heapol/czz078

- 1  
2  
3 16 Onishi J, Gupta S, Peters DH. Comparative analysis of exit interviews and direct clinical  
4 observations in Pediatric Ambulatory Care Services in Afghanistan. *International Journal for*  
5 *Quality in Health Care* 2011;**23**:76–82. doi:10.1093/intqhc/mzq074  
6  
7 17 Luck J, Peabody JW. Using standardised patients to measure physicians' practice:  
8 validation study using audio recordings. *BMJ* 2002;**325**:679. doi:10.1136/bmj.325.7366.679  
9  
10 18 Beullens J, Rethans JJ, Goedhuys J, *et al*. The use of standardized patients in research in general  
11 practice. *Fam Pract* 1997;**14**:58–62. doi:10.1093/fampra/14.1.58  
12  
13 19 Weiner SJ, Schwartz A. Directly observed care: Can unannounced standardized patients address a  
14 gap in performance measurement? *J Gen Intern Med* 2014;**29**:1183–7. doi:10.1007/s11606-014-  
15 2860-7  
16  
17 20 Nestel D, Bearman M. *Simulated Patient Methodology: Theory, Evidence and Practice*. 2014.  
18 doi:10.1002/9781118760673  
19  
20 21 Larsen A, Wilson KS, Kinuthia J, *et al*. Standardised patient encounters to improve quality of  
21 counselling for pre-exposure prophylaxis (PrEP) in adolescent girls and young women (AGYW)  
22 in Kenya: study protocol of a cluster randomised controlled trial. *BMJ Open* 2020;**10**:e035689–  
23 e035689. doi:10.1136/bmjopen-2019-035689  
24  
25 22 Daniels B, Dolinger A, Bedoya G, *et al*. Use of standardised patients to assess quality of  
26 healthcare in Nairobi, Kenya: A pilot, cross-sectional study with international comparisons. *BMJ*  
27 *Glob Health* Published Online First: 2017. doi:10.1136/bmjgh-2017-000333  
28  
29 23 Zabar S, Hanley K, Stevens D, *et al*. Unannounced standardized patients: A promising method of  
30 assessing patient-centered care in your health care system. *BMC Health Serv Res* 2014;**14**.  
31 doi:10.1186/1472-6963-14-157  
32  
33 24 Boffa J, Moyo S, Chikovore J, *et al*. Quality of care for tuberculosis and HIV in the private health  
34 sector: a cross-sectional, standardised patient study in South Africa. *BMJ Glob Health*  
35 2021;**6**:e005250. doi:10.1136/bmjgh-2021-005250  
36  
37 25 Wachira J, Middlestadt S, Reece M, *et al*. Psychometric assessment of a physician-patient  
38 communication behaviors scale: The perspective of adult HIV patients in Kenya. *AIDS Res Treat*  
39 2013;**2013**. doi:10.1155/2013/706191  
40  
41 26 Campbell C, Lockyer J, Laidlaw T, *et al*. Assessment of a matched-pair instrument to examine  
42 doctor–patient communication skills in practising doctors. *Med Educ* 2007;**41**:123–9.  
43 doi:https://doi.org/10.1111/j.1365-2929.2006.02657.x  
44  
45 27 Bieber C, Müller KG, Nicolai J, *et al*. How Does Your Doctor Talk with You? Preliminary  
46 Validation of a Brief Patient Self-Report Questionnaire on the Quality of Physician–Patient  
47 Interaction. *J Clin Psychol Med Settings* 2010;**17**:125–36. doi:10.1007/s10880-010-9189-0  
48  
49 28 Zou G. A Modified Poisson Regression Approach to Prospective Studies with Binary Data. *Am J*  
50 *Epidemiol* 2004;**159**:702–6. doi:10.1093/aje/kwh090  
51  
52 29 Shabalala FS, Vernooij E, Pell C, *et al*. Understanding reasons for discontinued antiretroviral  
53 treatment among clients in test and treat: a qualitative study in Swaziland. *J Int AIDS Soc*  
54 2018;**21**:e25120. doi:10.1002/jia2.25120  
55  
56 30 Grimsrud A, Bygrave H, Doherty M, *et al*. Reimagining HIV service delivery : the role of  
57 differentiated care from prevention to suppression. *J Acquir Immune Defic Syndr* 2016;:10–2.  
58 doi:10.7448/IAS.19.1.21484  
59  
60 31 Camlin CS, Neilands TB, Odeny TA, *et al*. Patient-reported factors associated with reengagement  
among HIV-infected patients disengaged from care in East Africa. *AIDS* 2015;:1.  
doi:10.1097/QAD.0000000000000931

- 1  
2  
3 32 Geng EH, Bangsberg DR, Musinguzi N, *et al.* Understanding Reasons for and Outcomes of  
4 Patients Lost to Follow-Up in Antiretroviral Therapy Programs in Africa Through a Sampling-  
5 Based Approach. *JAIDS Journal of Acquired Immune Deficiency Syndromes* 2010;**53**:405–11.  
6 doi:10.1097/QAI.0b013e3181b843f0  
7  
8 33 Ford N, Geng E, Ellman T, *et al.* Emerging priorities for HIV service delivery. *PLoS Med*  
9 2020;**17**:e1003028. doi:10.1371/JOURNAL.PMED.1003028  
10  
11 34 Ehrenkranz P, Grimsrud A, Holmes CB, *et al.* Expanding the Vision for Differentiated Service  
12 Delivery: A Call for More Inclusive and Truly Patient-Centered Care for People Living With  
13 HIV. *J Acquir Immune Defic Syndr* 2021;**86**:147. doi:10.1097/QAI.0000000000002549  
14  
15 35 Holmes CB, Sikazwe I, Sikombe K, *et al.* Estimated mortality on HIV treatment among active  
16 patients and patients lost to follow-up in 4 provinces of Zambia: Findings from a multistage  
17 sampling-based survey. *PLoS Med* 2018;**15**:e1002489. doi:10.1371/journal.pmed.1002489  
18  
19 36 Sikazwe I, Eshun-Wilson I, Sikombe K, *et al.* Retention and viral suppression in a cohort of HIV  
20 patients on antiretroviral therapy in Zambia: Regionally representative estimates using a  
21 multistage-sampling-based approach. *PLoS Med* 2019;**16**:1–17.  
22 doi:10.1371/journal.pmed.1002811  
23  
24 37 Hompashe DM, Gerdtham U-G, Christian CS, *et al.* ‘The nurse did not even greet me’: how  
25 informed versus non-informed patients evaluate health systems responsiveness in South Africa.  
26 *BMJ Glob Health* 2021;**6**:e004360. doi:10.1136/bmjgh-2020-004360  
27  
28 38 Hibbard JH, Greene J. What The Evidence Shows About Patient Activation: Better Health  
29 Outcomes And Care Experiences; Fewer Data On Costs. *Health Aff* 2013;**32**:207–14.  
30 doi:10.1377/hlthaff.2012.1061  
31  
32 39 Colvin CJ. Strategies for engaging men in HIV services. *Lancet HIV*. 2019;**6**:e191–200.  
33 doi:10.1016/S2352-3018(19)30032-3  
34  
35 40 Kerkhoff AD, Sikombe K, Eshun-Wilson I, *et al.* Mortality estimates by age and sex among  
36 persons living with HIV after ART initiation in Zambia using electronic medical records  
37 supplemented with tracing a sample of lost patients: A cohort study. *PLoS Med*  
38 2020;**17**:e1003107. <https://doi.org/10.1371/journal.pmed.1003107>  
39  
40 41 Narasimhan M, Yeh PT, Haberlen S, *et al.* Integration of HIV testing services into family  
41 planning services: a systematic review. *Reprod Health* 2019;**16**:61. doi:10.1186/s12978-019-  
42 0714-9  
43  
44 42 Godia PM, Olenja JM, Lavussa JA, *et al.* Sexual reproductive health service provision to young  
45 people in Kenya; Health service providers’ experiences. *BMC Health Serv Res* 2013;**13**:1–13.  
46 doi:10.1186/1472-6963-13-476/TABLES/2  
47  
48 43 Roberts BW, Puri NK, Trzeciak CJ, *et al.* Socioeconomic, racial and ethnic differences in patient  
49 experience of clinician empathy: Results of a systematic review and meta-analysis. *PLoS One*  
50 2021;**16**:e0247259. <https://doi.org/10.1371/journal.pone.0247259>  
51  
52 44 Aloh HE, Onwujekwe OE, Aloh OG, *et al.* Impact of socioeconomic status on patient experience  
53 on quality of care for ambulatory healthcare services in tertiary hospitals in Southeast Nigeria.  
54 *BMC Health Serv Res* 2020;**20**:473. doi:10.1186/s12913-020-05332-0  
55  
56 45 Humphrey-Murto S, Touchie C, Wood TJ, *et al.* Does the gender of the standardised patient  
57 influence candidate performance in an objective structured clinical examination? *Med Educ*  
58 2009;**43**:521–5. doi:10.1111/j.1365-2923.2009.03336.x  
59  
60 46 Kruk ME, Gage AD, Arsenault C, *et al.* High-quality health systems in the Sustainable  
Development Goals era: time for a revolution. *Lancet Glob Health*. 2018;**6**:e1196–252.  
doi:10.1016/S2214-109X(18)30386-3

1  
2  
3  
4  
5  
6  
7  
8  
9  
10  
11  
12  
13  
14  
15  
16  
17  
18  
19  
20  
21  
22  
23  
24  
25  
26  
27  
28  
29  
30  
31  
32  
33  
34  
35  
36  
37  
38  
39  
40  
41  
42  
43  
44  
45  
46  
47  
48  
49  
50  
51  
52  
53  
54  
55  
56  
57  
58  
59  
60

For peer review only

1  
2  
3  
4  
5  
6  
7  
8  
9  
10  
11  
12  
13  
14  
15  
16  
17  
18  
19  
20  
21  
22  
23  
24  
25  
26  
27  
28  
29  
30  
31  
32  
33  
34  
35  
36  
37  
38  
39  
40  
41  
42  
43  
44  
45  
46  
47  
48  
49  
50  
51  
52  
53  
54  
55  
56  
57  
58  
59  
60



674x330mm (72 x 72 DPI)

1  
2  
3  
4  
5  
6  
7  
8  
9  
10  
11  
12  
13  
14  
15  
16  
17  
18  
19  
20  
21  
22  
23  
24  
25  
26  
27  
28  
29  
30  
31  
32  
33  
34  
35  
36  
37  
38  
39  
40  
41  
42  
43  
44  
45  
46  
47  
48  
49  
50  
51  
52  
53  
54  
55  
56  
57  
58  
59  
60



629x374mm (72 x 72 DPI)

1  
2  
3  
4  
5  
6  
7  
8  
9  
10  
11  
12  
13  
14  
15  
16  
17  
18  
19  
20  
21  
22  
23  
24  
25  
26  
27  
28  
29  
30  
31  
32  
33  
34  
35  
36  
37  
38  
39  
40  
41  
42  
43  
44  
45  
46  
47  
48  
49  
50  
51  
52  
53  
54  
55  
56  
57  
58  
59  
60



279x215mm (72 x 72 DPI)

## Supplementary Tables S1

**Supplementary Table S1. Mixed effect Poisson regression comparing 10 questions for Trained Exit Clients vs Untrained Exit Clients. Adjusted for age, sex, education, and study period.**

| Trained Exit Clients                                                                     | Prevalence ratio (PR) Unadjusted | P value | 95% Confidence Interval (CI) | PR-Adjusted | P value | 95% Confidence Interval (CI) | N    |
|------------------------------------------------------------------------------------------|----------------------------------|---------|------------------------------|-------------|---------|------------------------------|------|
| Sum score (Rate ratio)                                                                   | 1.73                             | <0.01   | 1.47-2.02                    | 1.64        | <0.01   | 1.39-1.94                    | 3480 |
| Did your HIV care provider greet you in a way that made you feel comfortable?            | 1.74                             | 0.01    | 1.24-2.44                    | 1.71        | <0.01   | 1.20-2.44                    | 3526 |
| Did your HIV care provider listen to what you said?                                      | 1.77                             | 0.09    | 0.91-3.45                    | 1.71        | 0.09    | 0.93-3.16                    | 3510 |
| Did your HIV care provider give you as much information about your health as you wanted? | 1.82                             | <0.01   | 1.43-2.33                    | 1.72        | <0.01   | 1.37-2.15                    | 3526 |
| Did your HIV care provider allow you to ask questions?                                   | 1.44                             | <0.01   | 1.20-1.73                    | 1.34        | <0.01   | 1.12-1.6                     | 3517 |
| Did your HIV care provider spend the right amount of time with you?                      | 1.94                             | <0.01   | 1.66-2.27                    | 1.85        | <0.01   | 1.58-2.17                    | 3520 |
| Overall, how did you feel about the care you received today?                             | 1.51                             | 0.02    | 1.06-2.16                    | 1.54        | 0.02    | 1.07-2.21                    | 3515 |
| Overall, were you satisfied with all your HIV care providers today?                      | 2.12                             | <0.01   | 1.68-2.66                    | 2.06        | <0.01   | 1.61-2.63                    | 3522 |
| I witnessed HIV care providers behaving rudely during my visit today                     | 2.39                             | <0.01   | 1.73-3.32                    | 2.28        | <0.01   | 1.63-3.19                    | 3524 |
| Were your lab results lost?                                                              | 0.99                             | 0.98    | 0.84-1.19                    | 0.99        | 0.93    | 0.78-1.26                    | 3522 |
| Were you able to pick up your medicine today?                                            | 1.04                             | 0.90    | 0.57-1.89                    | 1.26        | 0.55    | 0.59-2.71                    | 3525 |



1  
2  
3  
4  
5  
6  
7  
8  
9  
10  
11  
12  
13  
14  
15  
16  
17  
18  
19  
20  
21  
22  
23  
24  
25  
26  
27  
28  
29  
30  
31  
32  
33  
34  
35  
36  
37  
38  
39  
40  
41  
42  
43  
44  
45  
46  
47  
48  
49  
50  
51  
52  
53  
54  
55  
56  
57  
58  
59  
60

For peer review only

Supplementary Figure 1.

**Impact of Training on Identifying Care Lapses Stratified by Subgroups for 10 questions.** We observed some level of interaction for care status, age category, education category and facility size. Panel **a)** Greet you in a way that made you feel comfortable **b)** Listen to what you said **c)** Give you as much information about your health as you wanted **d)** Allowed you to ask questions, responded, happy q456 **e)** spend the right amount of time with you **f)** feel about the care you received today **g)** satisfied with all your HIV care providers today **h)** witnessed HIV care providers behaving rudely during my visit today **i)** lost lab results **j)** pick up meds



### b) Impact of Training on Identifying Care Lapses Stratified by Subgroups- Listened



ew only

**c) Impact of Training on Identifying Care Lapses  
Stratified by Subgroups- Information**



Review only

**d) Impact of Training on Identifying Care Lapses  
Stratified by Subgroups- Question\_456**



view only

**e) Impact of Training on Identifying Care Lapses  
Stratified by Subgroups- Spend time**

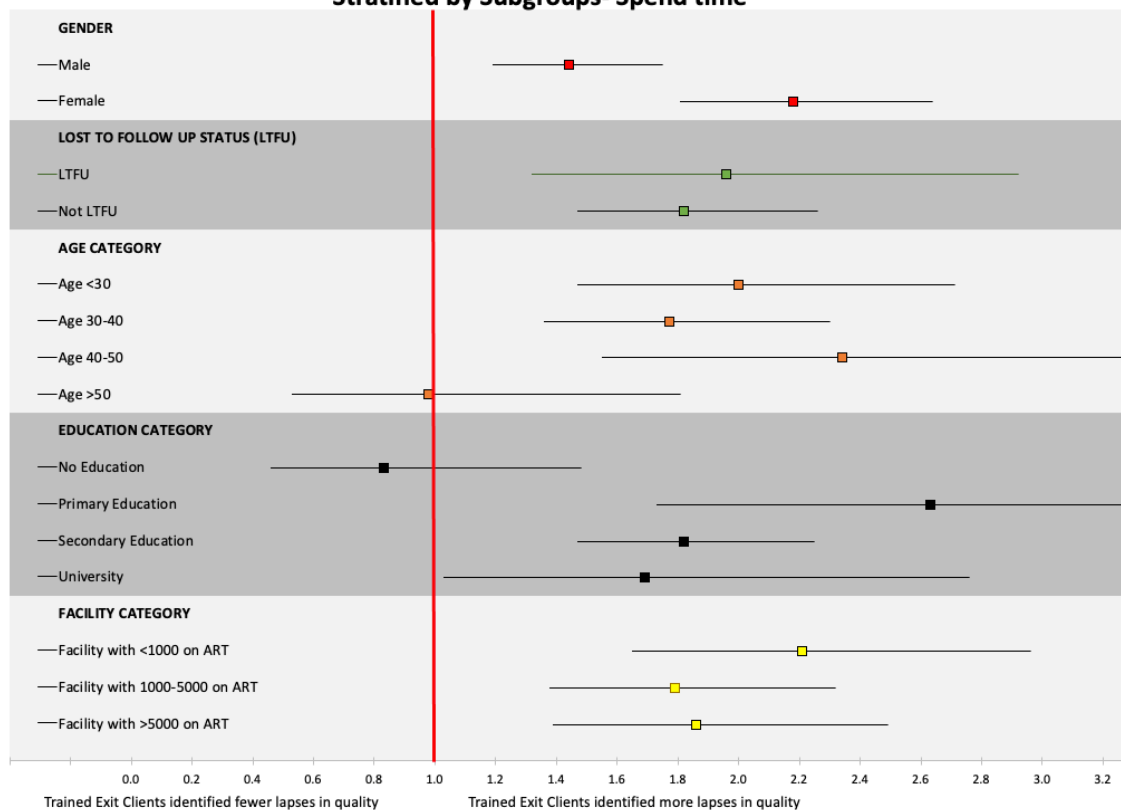

view only

### f) Impact of Training on Identifying Care Lapses Stratified by Subgroups- Feel about care



view only

**g) Impact of Training on Identifying Care Lapses  
Stratified by Subgroups- Satisfied**

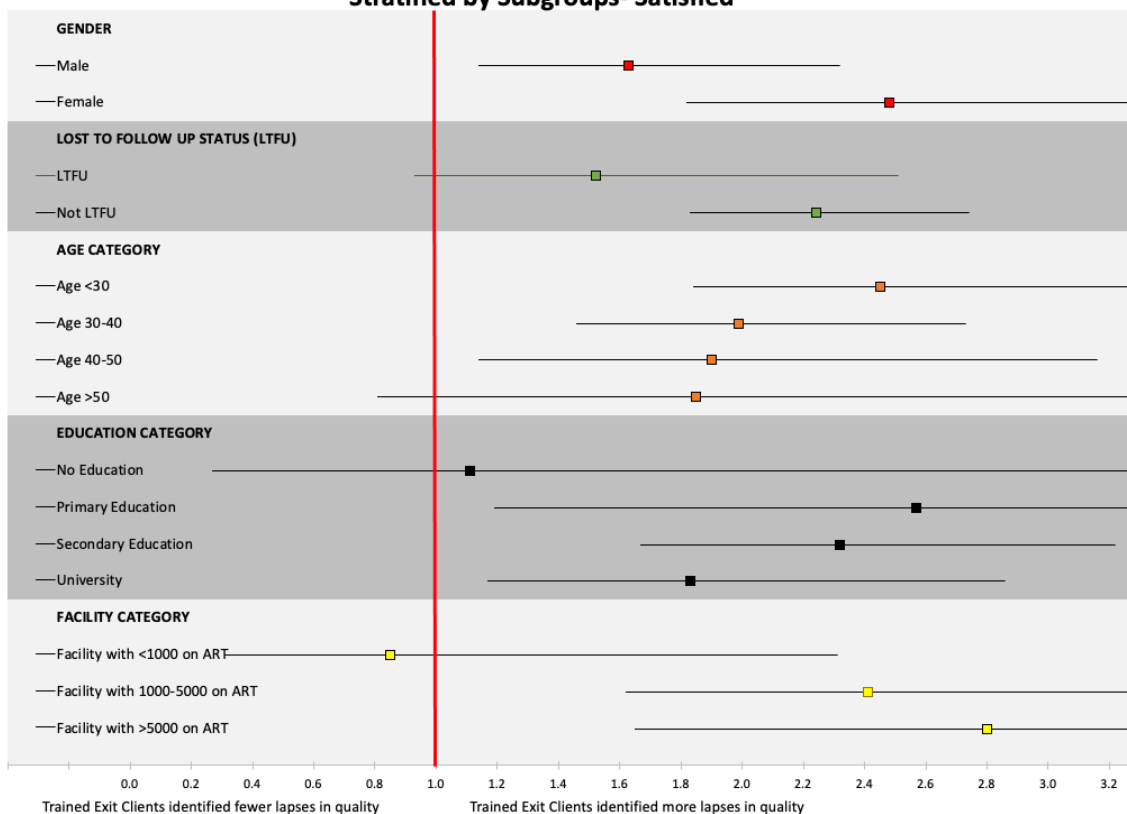

view only



### h) Impact of Training on Identifying Care Lapses Stratified by Subgroups- Rude



view only

**i) Impact of Training on Identifying Care Lapses  
Stratified by Subgroups- Lab results**



view only

1  
2  
3  
4  
5  
6  
7  
8  
9  
10  
11  
12  
13  
14  
15  
16  
17  
18  
19  
20  
21  
22  
23  
24  
25  
26  
27  
28  
29  
30  
31  
32  
33  
34  
35  
36  
37  
38  
39  
40  
41  
42  
43  
44  
45  
46  
47  
48  
49  
50  
51  
52  
53  
54  
55  
56  
57  
58  
59  
60

### j) Impact of Training on Identifying Care Lapses Stratified by Subgroups- Pick up meds



view only

Supplementary Figure 2

**Supplementary Figure 2.** Bubble plot showing Trained Exit Sum Score vs Untrained Exit Sum Score. Each bubble represents a single facilities performance. Each bubble's size indicates the number of patients at each facility with larger bubbles corresponding to larger facilities. The horizontal position notes the Untrained Exit Sum Score for all questions against the facility, and the vertical position notes the Trained Exit sum score at the same facility.



1  
2  
3  
4  
5  
6  
7  
8  
9  
10  
11  
12  
13  
14  
15  
16  
17  
18  
19  
20  
21  
22  
23  
24  
25  
26  
27  
28  
29  
30  
31  
32  
33  
34  
35  
36  
37  
38  
39  
40  
41  
42  
43  
44  
45  
46  
47  
48  
49  
50  
51  
52  
53  
54  
55  
56  
57  
58  
59  
60

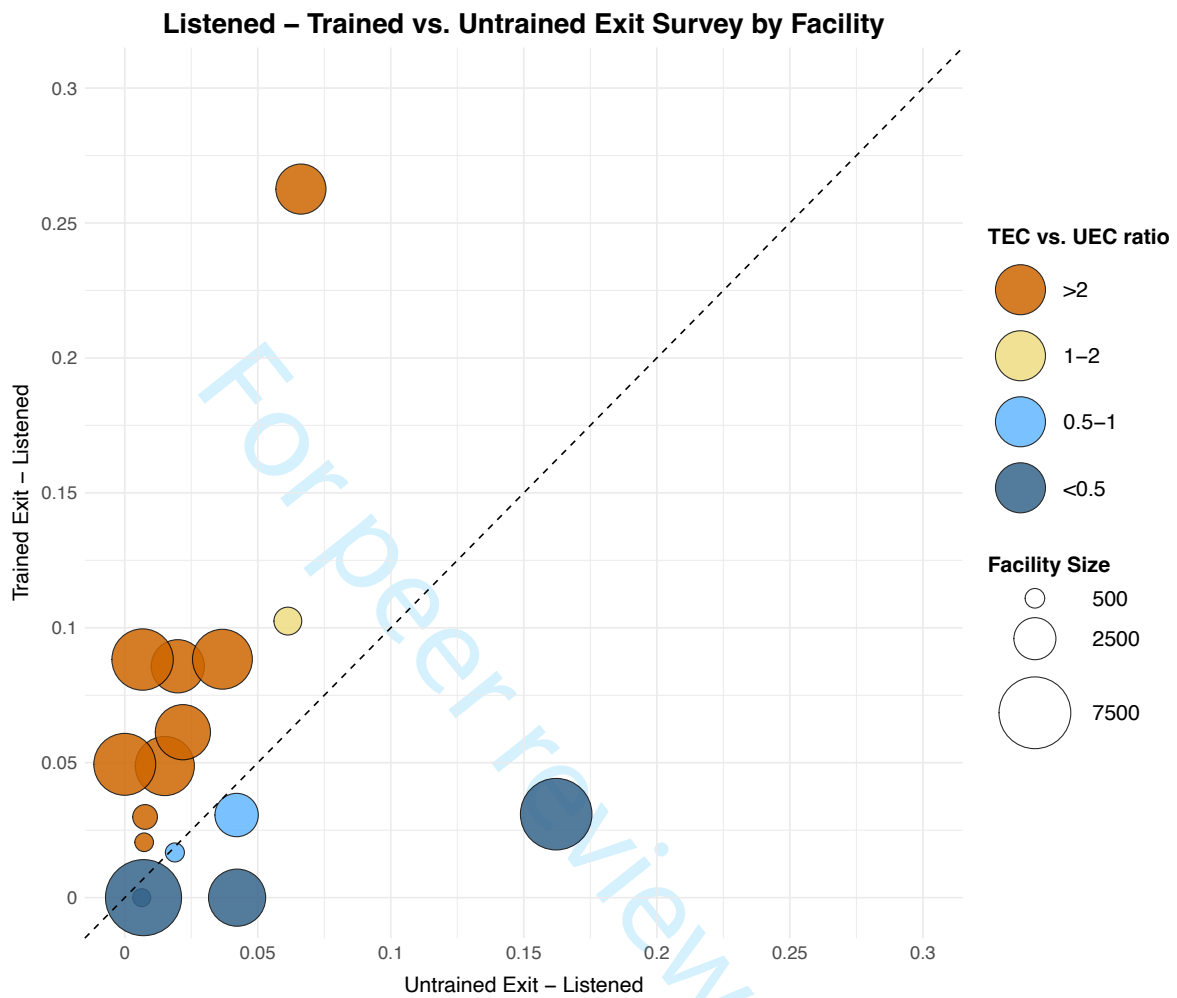



1  
2  
3  
4  
5  
6  
7  
8  
9  
10  
11  
12  
13  
14  
15  
16  
17  
18  
19  
20  
21  
22  
23  
24  
25  
26  
27  
28  
29  
30  
31  
32  
33  
34  
35  
36  
37  
38  
39  
40  
41  
42  
43  
44  
45  
46  
47  
48  
49  
50  
51  
52  
53  
54  
55  
56  
57  
58  
59  
60

1  
2  
3  
4  
5  
6  
7  
8  
9  
10  
11  
12  
13  
14  
15  
16  
17  
18  
19  
20  
21  
22  
23  
24  
25  
26  
27  
28  
29  
30  
31  
32  
33  
34  
35  
36  
37  
38  
39  
40  
41  
42  
43  
44  
45  
46  
47  
48  
49  
50  
51  
52  
53  
54  
55  
56  
57  
58  
59  
60







1  
2  
3  
4  
5  
6  
7  
8  
9  
10  
11  
12  
13  
14  
15  
16  
17  
18  
19  
20  
21  
22  
23  
24  
25  
26  
27  
28  
29  
30  
31  
32  
33  
34  
35  
36  
37  
38  
39  
40  
41  
42  
43  
44  
45  
46  
47  
48  
49  
50  
51  
52  
53  
54  
55  
56  
57  
58  
59  
60

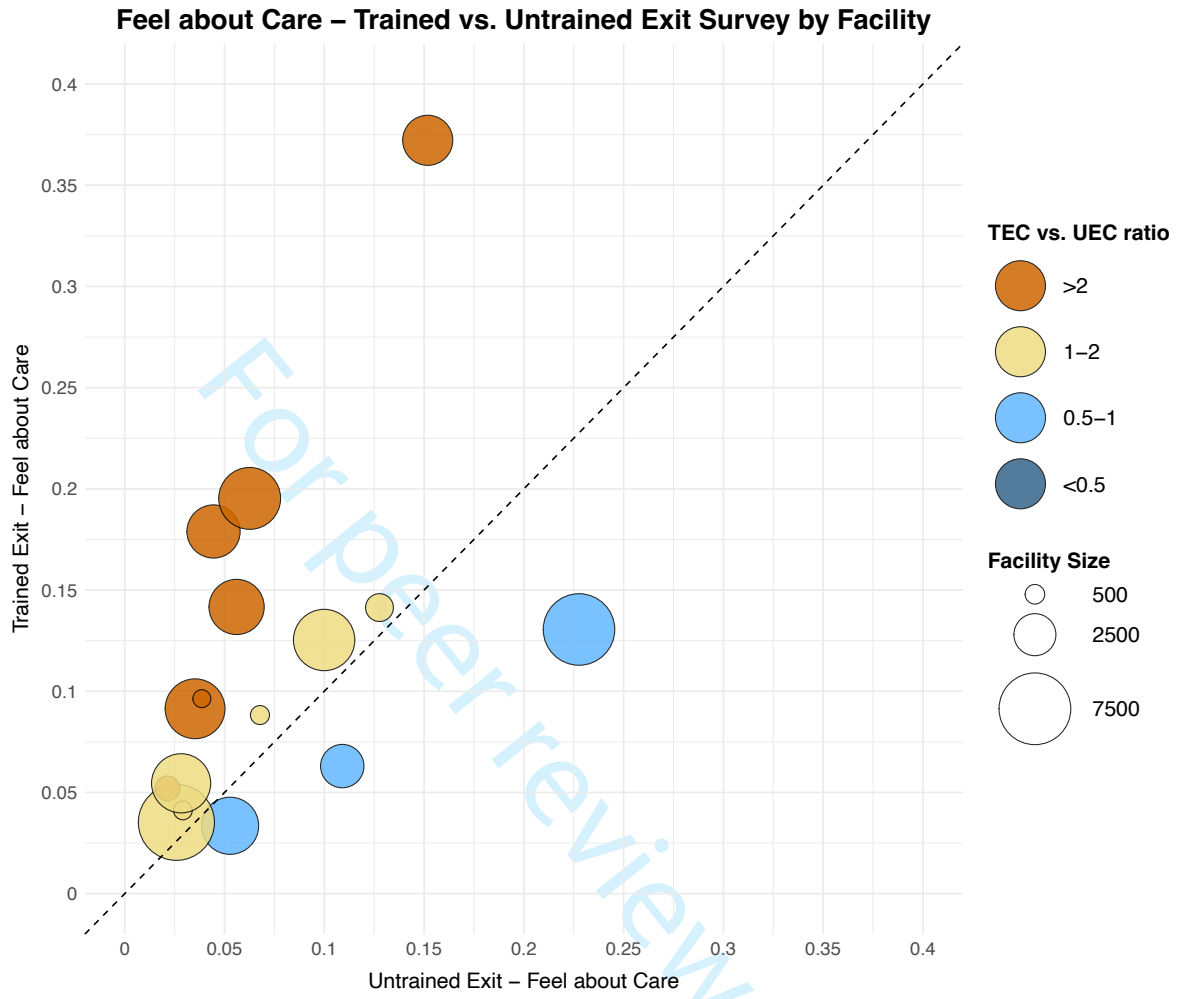



1  
2  
3  
4  
5  
6  
7  
8  
9  
10  
11  
12  
13  
14  
15  
16  
17  
18  
19  
20  
21  
22  
23  
24  
25  
26  
27  
28  
29  
30  
31  
32  
33  
34  
35  
36  
37  
38  
39  
40  
41  
42  
43  
44  
45  
46  
47  
48  
49  
50  
51  
52  
53  
54  
55  
56  
57  
58  
59  
60





## STROBE Statement—checklist of items that should be included in reports of observational studies

|                              | Item No | Recommendation                                                                                                                                                                                                                                                                                                                                                                                                                                                         | Page No |
|------------------------------|---------|------------------------------------------------------------------------------------------------------------------------------------------------------------------------------------------------------------------------------------------------------------------------------------------------------------------------------------------------------------------------------------------------------------------------------------------------------------------------|---------|
| <b>Title and abstract</b>    | 1       | (a) Indicate the study's design with a commonly used term in the title or the abstract                                                                                                                                                                                                                                                                                                                                                                                 | 1       |
|                              |         | (b) Provide in the abstract an informative and balanced summary of what was done and what was found                                                                                                                                                                                                                                                                                                                                                                    | 1       |
| <b>Introduction</b>          |         |                                                                                                                                                                                                                                                                                                                                                                                                                                                                        |         |
| Background/rationale         | 2       | Explain the scientific background and rationale for the investigation being reported                                                                                                                                                                                                                                                                                                                                                                                   | 3,4     |
| Objectives                   | 3       | State specific objectives, including any prespecified hypotheses                                                                                                                                                                                                                                                                                                                                                                                                       | 3       |
| <b>Methods</b>               |         |                                                                                                                                                                                                                                                                                                                                                                                                                                                                        |         |
| Study design                 | 4       | Present key elements of study design early in the paper                                                                                                                                                                                                                                                                                                                                                                                                                | 4,5     |
| Setting                      | 5       | Describe the setting, locations, and relevant dates, including periods of recruitment, exposure, follow-up, and data collection                                                                                                                                                                                                                                                                                                                                        | 5       |
| Participants                 | 6       | (a) <i>Cohort study</i> —Give the eligibility criteria, and the sources and methods of selection of participants. Describe methods of follow-up<br><i>Case-control study</i> —Give the eligibility criteria, and the sources and methods of case ascertainment and control selection. Give the rationale for the choice of cases and controls<br><i>Cross-sectional study</i> —Give the eligibility criteria, and the sources and methods of selection of participants | 5,6     |
|                              |         | (b) <i>Cohort study</i> —For matched studies, give matching criteria and number of exposed and unexposed<br><i>Case-control study</i> —For matched studies, give matching criteria and the number of controls per case                                                                                                                                                                                                                                                 | N/A     |
| Variables                    | 7       | Clearly define all outcomes, exposures, predictors, potential confounders, and effect modifiers. Give diagnostic criteria, if applicable                                                                                                                                                                                                                                                                                                                               | 5,7,8   |
| Data sources/<br>measurement | 8*      | For each variable of interest, give sources of data and details of methods of assessment (measurement). Describe comparability of assessment methods if there is more than one group                                                                                                                                                                                                                                                                                   | 5-7     |
| Bias                         | 9       | Describe any efforts to address potential sources of bias                                                                                                                                                                                                                                                                                                                                                                                                              | 4       |
| Study size                   | 10      | Explain how the study size was arrived at                                                                                                                                                                                                                                                                                                                                                                                                                              | 8       |
| Quantitative variables       | 11      | Explain how quantitative variables were handled in the analyses. If applicable, describe which groupings were chosen and why                                                                                                                                                                                                                                                                                                                                           | 7       |
| Statistical methods          | 12      | (a) Describe all statistical methods, including those used to control for confounding                                                                                                                                                                                                                                                                                                                                                                                  | 7       |
|                              |         | (b) Describe any methods used to examine subgroups and interactions                                                                                                                                                                                                                                                                                                                                                                                                    | 7       |
|                              |         | (c) Explain how missing data were addressed                                                                                                                                                                                                                                                                                                                                                                                                                            | N/A     |
|                              |         | (d) <i>Cohort study</i> —If applicable, explain how loss to follow-up was addressed<br><i>Case-control study</i> —If applicable, explain how matching of cases and controls was addressed<br><i>Cross-sectional study</i> —If applicable, describe analytical methods taking account of sampling strategy                                                                                                                                                              | N/A     |
|                              |         | (e) Describe any sensitivity analyses                                                                                                                                                                                                                                                                                                                                                                                                                                  | N/A     |

Continued on next page

| <b>Results</b>           |     |                                                                                                                                                                                                              |       |
|--------------------------|-----|--------------------------------------------------------------------------------------------------------------------------------------------------------------------------------------------------------------|-------|
| Participants             | 13* | (a) Report numbers of individuals at each stage of study—eg numbers potentially eligible, examined for eligibility, confirmed eligible, included in the study, completing follow-up, and analysed            | 9     |
|                          |     | (b) Give reasons for non-participation at each stage                                                                                                                                                         | 9     |
|                          |     | (c) Consider use of a flow diagram                                                                                                                                                                           | N/A   |
| Descriptive data         | 14* | (a) Give characteristics of study participants (eg demographic, clinical, social) and information on exposures and potential confounders                                                                     | 9, 10 |
|                          |     | (b) Indicate number of participants with missing data for each variable of interest                                                                                                                          | 9,10  |
|                          |     | (c) <i>Cohort study</i> —Summarise follow-up time (eg, average and total amount)                                                                                                                             | N/A   |
| Outcome data             | 15* | <i>Cohort study</i> —Report numbers of outcome events or summary measures over time                                                                                                                          | N/A   |
|                          |     | <i>Case-control study</i> —Report numbers in each exposure category, or summary measures of exposure                                                                                                         | N/A   |
|                          |     | <i>Cross-sectional study</i> —Report numbers of outcome events or summary measures                                                                                                                           | 10    |
| Main results             | 16  | (a) Give unadjusted estimates and, if applicable, confounder-adjusted estimates and their precision (eg, 95% confidence interval). Make clear which confounders were adjusted for and why they were included | 7,11  |
|                          |     | (b) Report category boundaries when continuous variables were categorized                                                                                                                                    |       |
|                          |     | (c) If relevant, consider translating estimates of relative risk into absolute risk for a meaningful time period                                                                                             |       |
| Other analyses           | 17  | Report other analyses done—eg analyses of subgroups and interactions, and sensitivity analyses                                                                                                               | 12,14 |
| <b>Discussion</b>        |     |                                                                                                                                                                                                              |       |
| Key results              | 18  | Summarise key results with reference to study objectives                                                                                                                                                     | 14,15 |
| Limitations              | 19  | Discuss limitations of the study, taking into account sources of potential bias or imprecision. Discuss both direction and magnitude of any potential bias                                                   | 18    |
| Interpretation           | 20  | Give a cautious overall interpretation of results considering objectives, limitations, multiplicity of analyses, results from similar studies, and other relevant evidence                                   | 19,20 |
| Generalisability         | 21  | Discuss the generalisability (external validity) of the study results                                                                                                                                        | 18    |
| <b>Other information</b> |     |                                                                                                                                                                                                              |       |
| Funding                  | 22  | Give the source of funding and the role of the funders for the present study and, if applicable, for the original study on which the present article is based                                                | 20    |

\*Give information separately for cases and controls in case-control studies and, if applicable, for exposed and unexposed groups in cohort and cross-sectional studies.

**Note:** An Explanation and Elaboration article discusses each checklist item and gives methodological background and published examples of transparent reporting. The STROBE checklist is best used in conjunction with this article (freely available on the Web sites of PLoS Medicine at <http://www.plosmedicine.org/>, Annals of Internal Medicine at <http://www.annals.org/>, and Epidemiology at <http://www.epidem.com/>). Information on the STROBE Initiative is available at [www.strobe-statement.org](http://www.strobe-statement.org).
