# Supplementary material for: Comparison of patient exit interviews with unannounced standardised patients for assessing HIV service delivery in Zambia: a study nested within a cluster randomised trial
Source: PubMed Central journal article supplement (PMC10335575; doi:10.1136/bmjopen-2022-069086), 2023-07-05

## Supplementary Figure 2

**Supplementary Figure 2.** Bubble plot showing Trained Exit Sum Score vs Untrained Exit Sum Score. Each bubble represents a single facilities performance. Each bubble's size indicates the number of patients at each facility with larger bubbles corresponding to larger facilities. The horizontal position notes the Untrained Exit Sum Score for all questions against the facility, and the vertical position notes the Trained Exit sum score at the same facility.

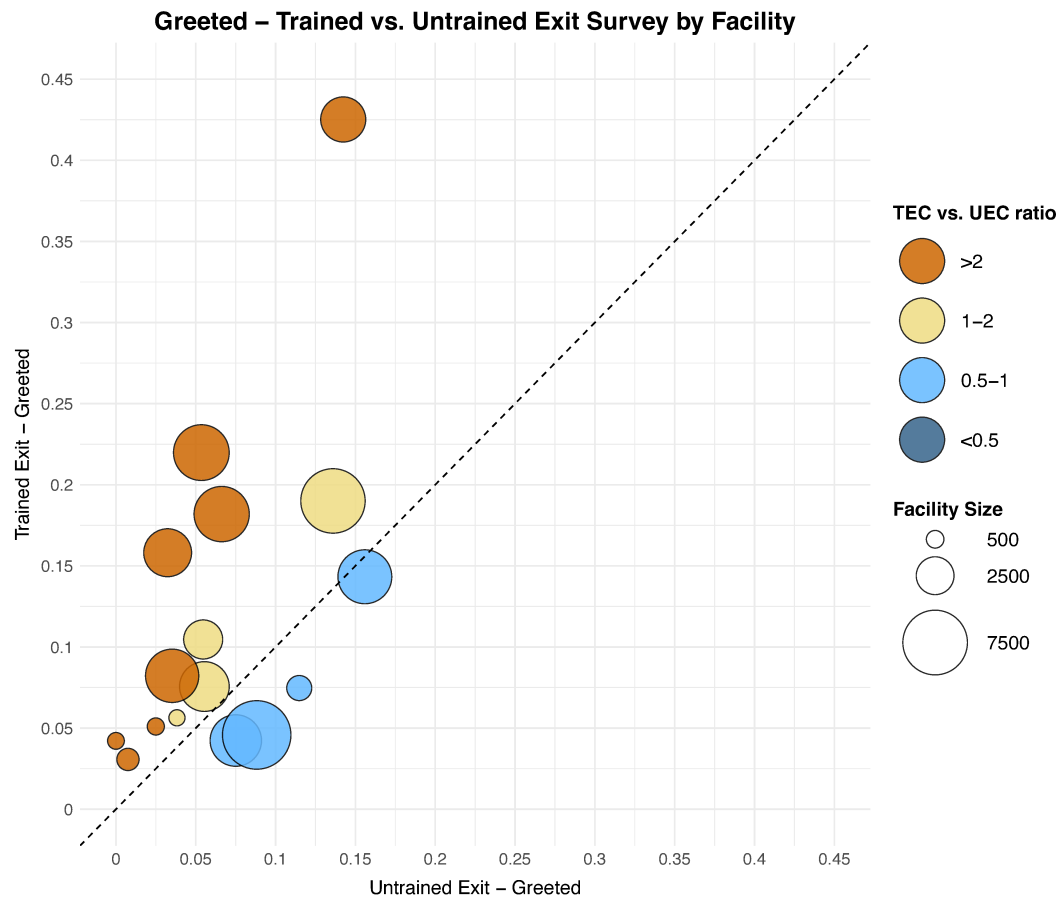

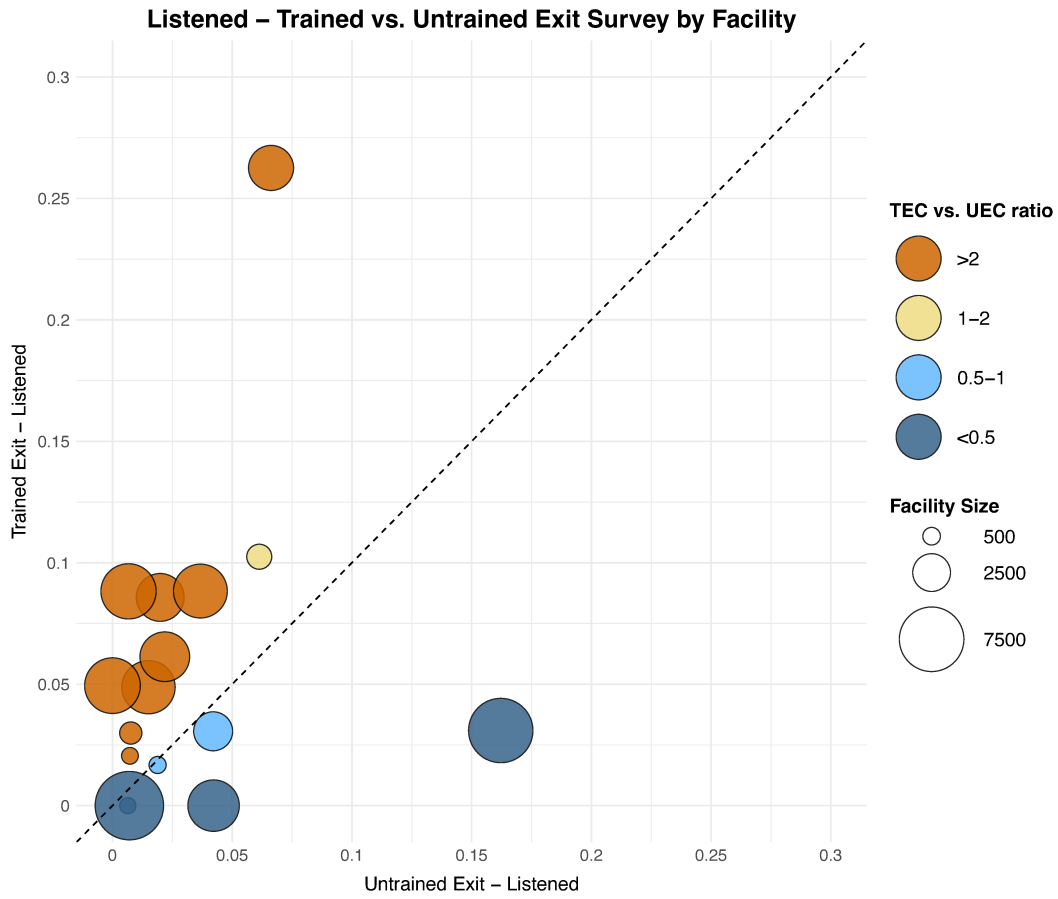

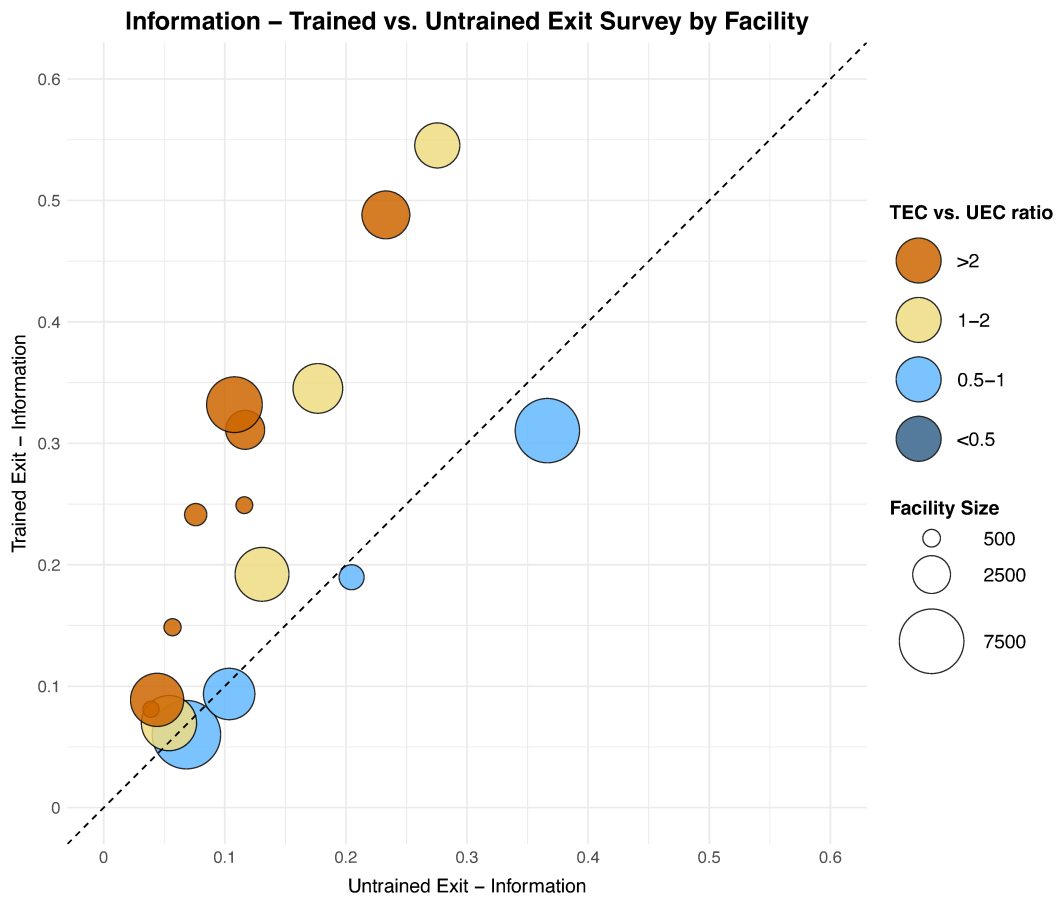

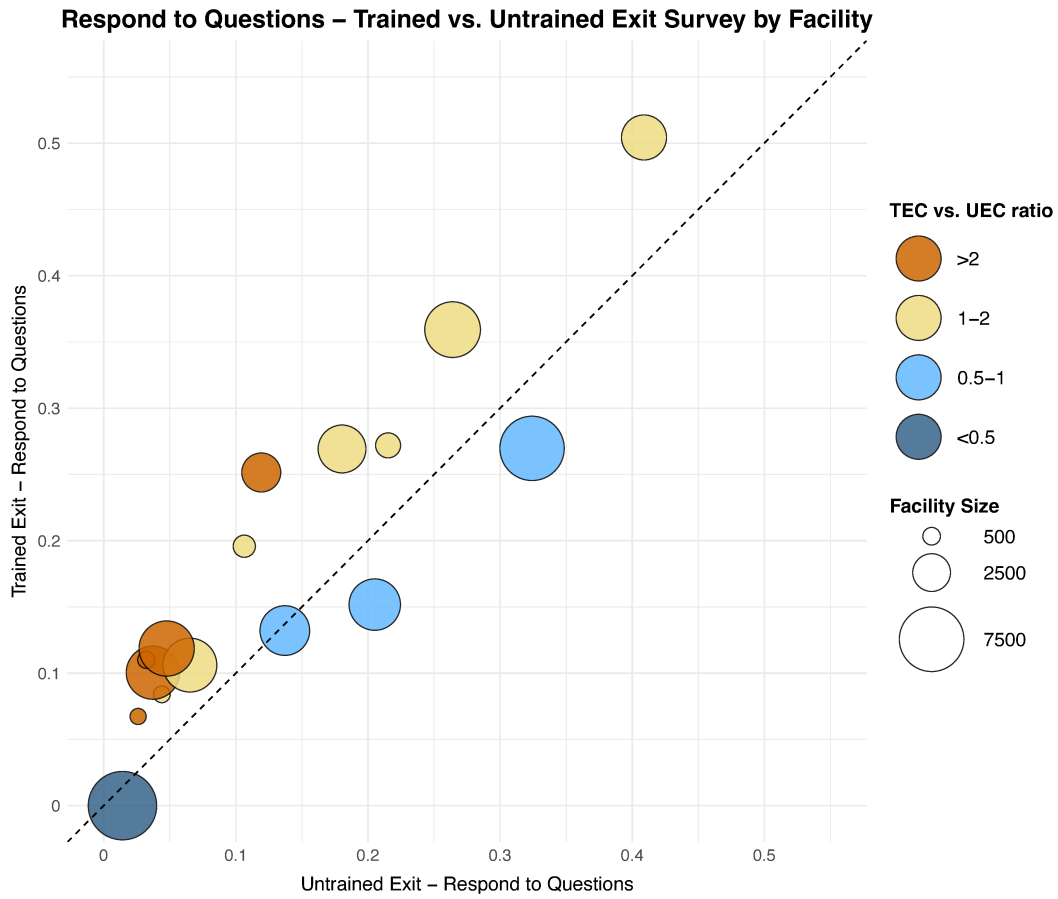

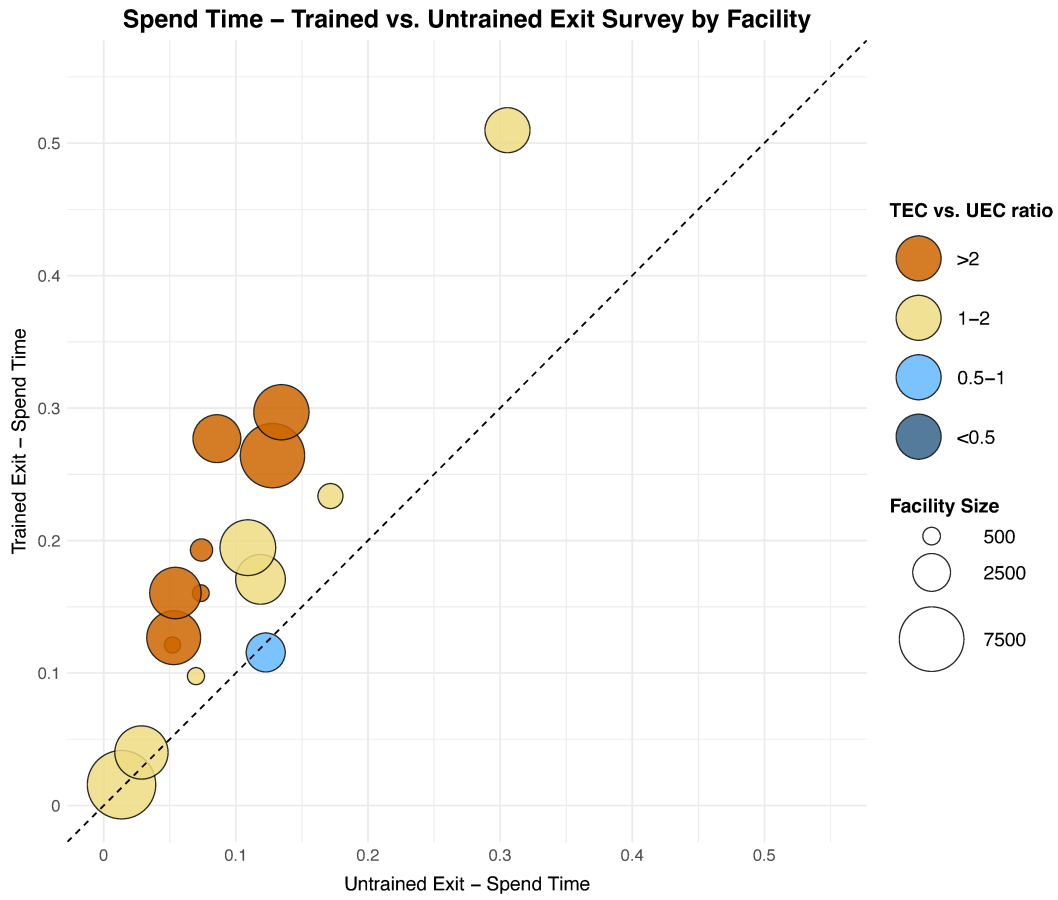

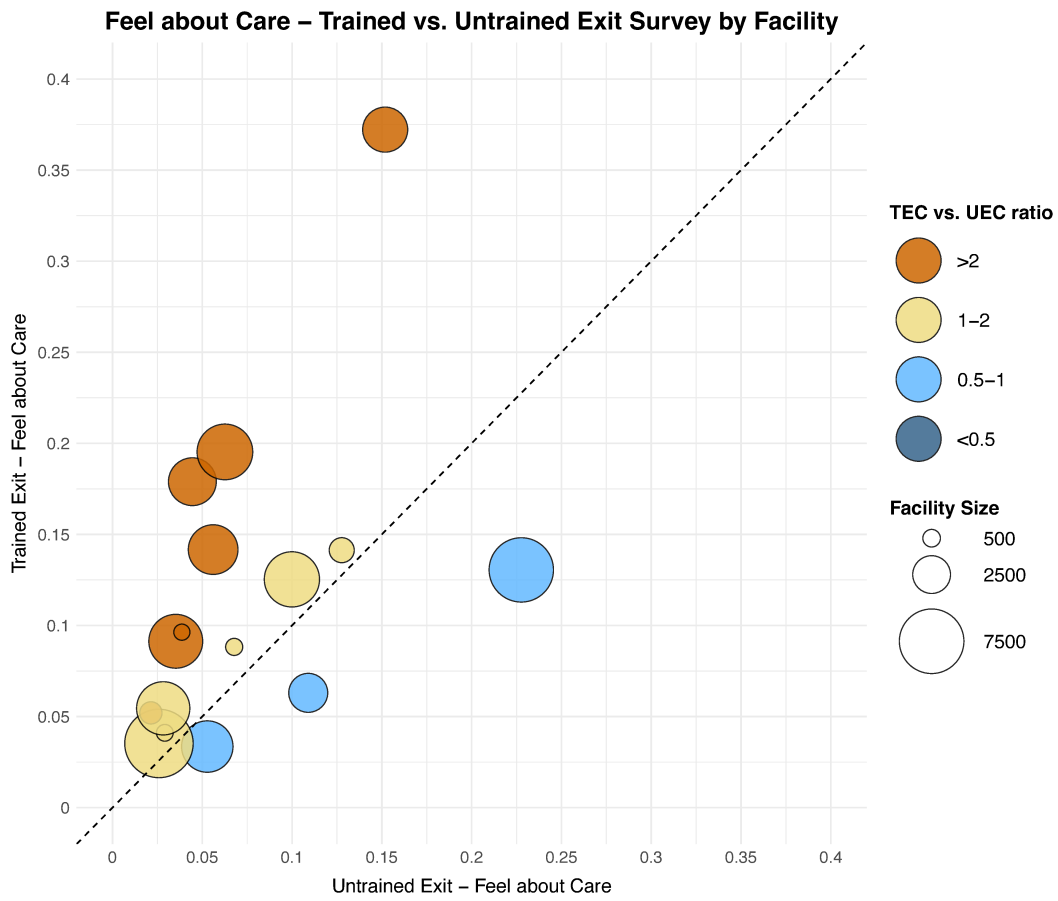

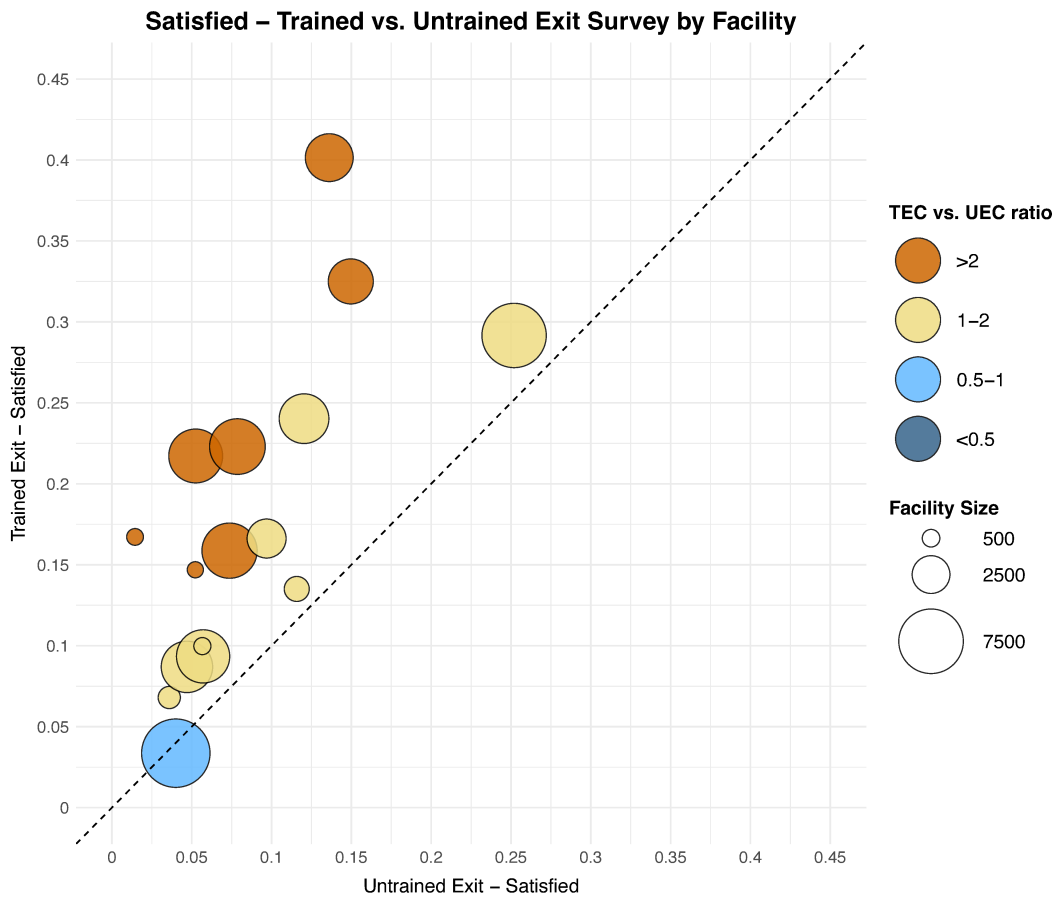

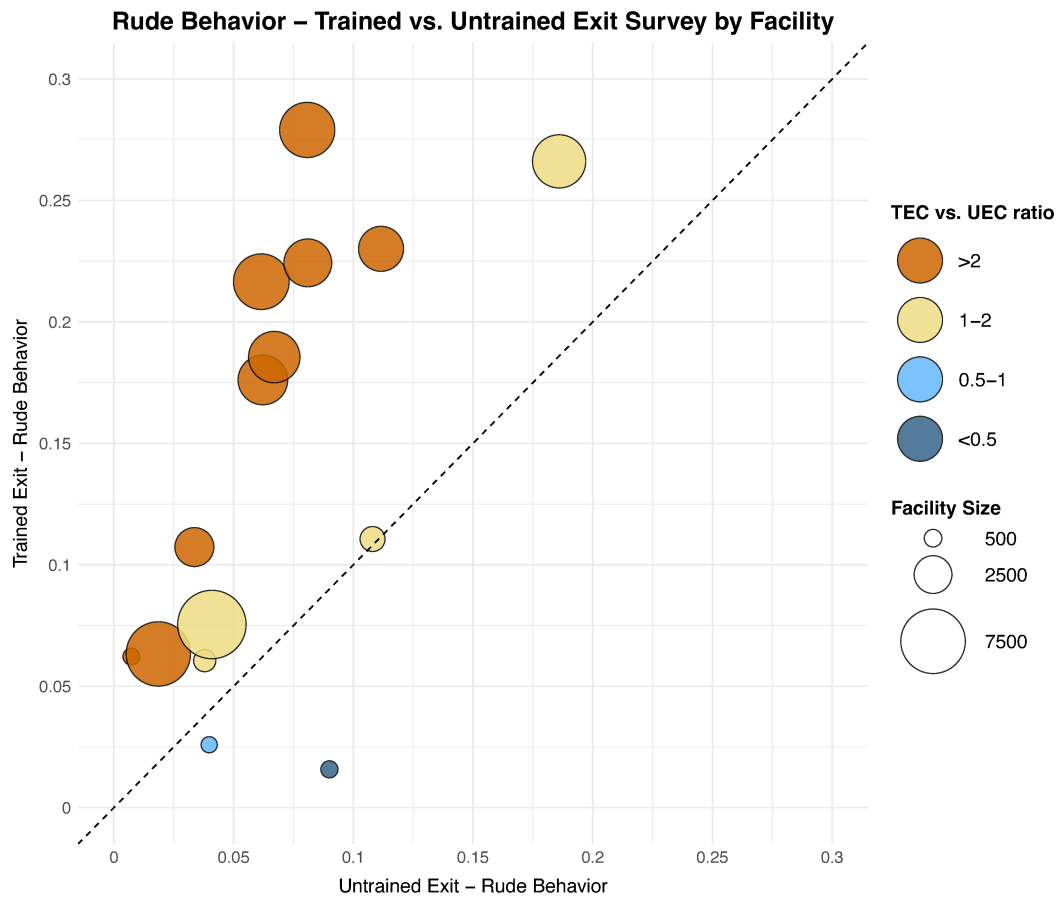



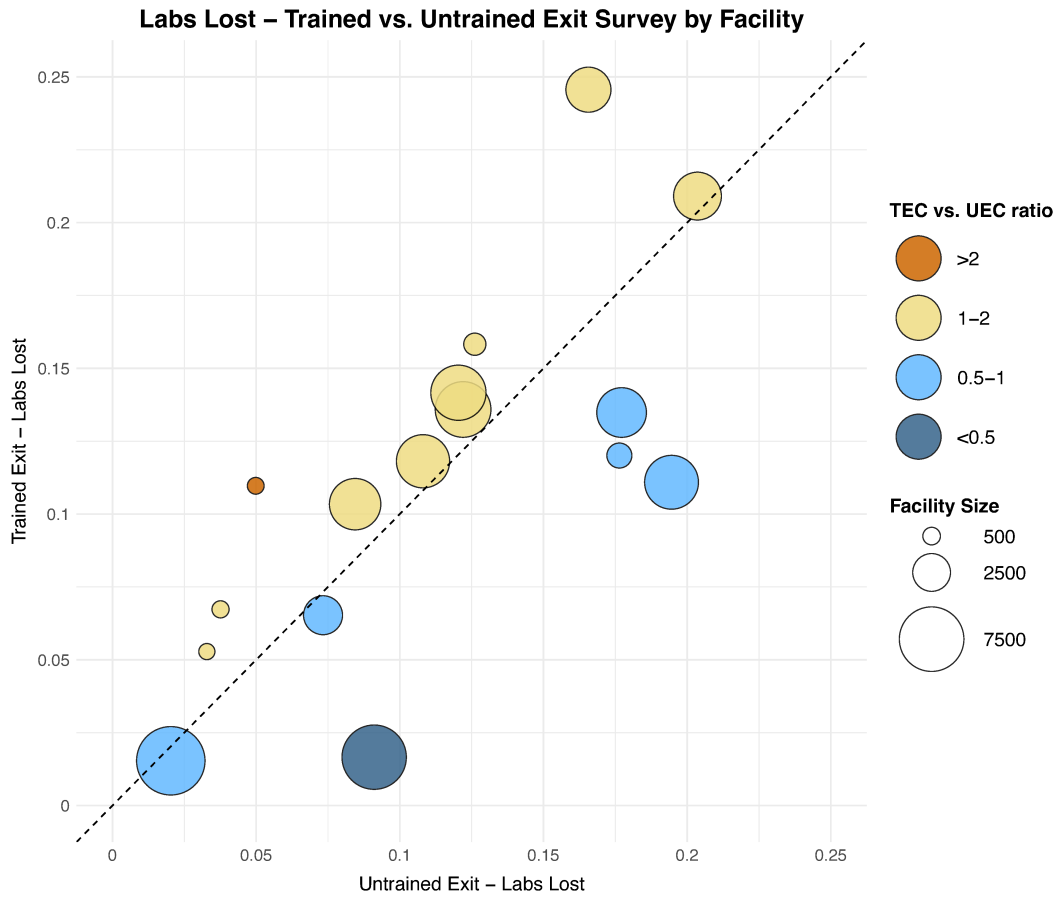

Supplement: bmjopen-2022-069086supp002.pdf [file bmjopen-2022-069086supp002.pdf]
