# Supplementary material for: Comparison of patient exit interviews with unannounced standardised patients for assessing HIV service delivery in Zambia: a study nested within a cluster randomised trial
Source: PubMed Central journal article supplement (PMC10335575; doi:10.1136/bmjopen-2022-069086), 2023-07-05
Supplement: bmjopen-2022-069086supp003.pdf [file bmjopen-2022-069086supp003.pdf]

## Supplementary Tables S1

**Supplementary Table S1. Mixed effect Poisson regression comparing 10 questions for Trained Exit Clients vs Untrained Exit Clients. Adjusted for age, sex, education, and study period.**

| Trained Exit Clients                                                                     | Prevalence ratio (PR) Unadjusted | P value | 95% Confidence Interval (CI) | PR-Adjusted | P value | 95% Confidence Interval (CI) | N    |
|------------------------------------------------------------------------------------------|----------------------------------|---------|------------------------------|-------------|---------|------------------------------|------|
| Sum score (Rate ratio)                                                                   | 1.73                             | <0.01   | 1.47-2.02                    | 1.64        | <0.01   | 1.39-1.94                    | 3480 |
| Did your HIV care provider greet you in a way that made you feel comfortable?            | 1.74                             | 0.01    | 1.24-2.44                    | 1.71        | <0.01   | 1.20-2.44                    | 3526 |
| Did your HIV care provider listen to what you said?                                      | 1.77                             | 0.09    | 0.91-3.45                    | 1.71        | 0.09    | 0.93-3.16                    | 3510 |
| Did your HIV care provider give you as much information about your health as you wanted? | 1.82                             | <0.01   | 1.43-2.33                    | 1.72        | <0.01   | 1.37-2.15                    | 3526 |
| Did your HIV care provider allow you to ask questions?                                   | 1.44                             | <0.01   | 1.20-1.73                    | 1.34        | <0.01   | 1.12-1.6                     | 3517 |
| Did your HIV care provider spend the right amount of time with you?                      | 1.94                             | <0.01   | 1.66-2.27                    | 1.85        | <0.01   | 1.58-2.17                    | 3520 |
| Overall, how did you feel about the care you received today?                             | 1.51                             | 0.02    | 1.06-2.16                    | 1.54        | 0.02    | 1.07-2.21                    | 3515 |
| Overall, were you satisfied with all your HIV care providers today?                      | 2.12                             | <0.01   | 1.68-2.66                    | 2.06        | <0.01   | 1.61-2.63                    | 3522 |
| I witnessed HIV care providers behaving rudely during my visit today                     | 2.39                             | <0.01   | 1.73-3.32                    | 2.28        | <0.01   | 1.63-3.19                    | 3524 |
| Were your lab results lost?                                                              | 0.99                             | 0.98    | 0.84-1.19                    | 0.99        | 0.93    | 0.78-1.26                    | 3522 |
| Were you able to pick up your medicine today?                                            | 1.04                             | 0.90    | 0.57-1.89                    | 1.26        | 0.55    | 0.59-2.71                    | 3525 |
